# Supplementary material
Source: Research Square preprint supplement (doi:10.21203/rs.3.rs-9566115/v1)
Supplement: Supplementary file 1 [file 0f0a67289b8f41fd46c9738b.docx]

| Molecule | PUB CHEM | PCID | Canonical SMILES | Formula | MW | ESOL Class | GI absorption | Lipinski #violations | Ghose #violations | Veber #violations | Egan #violations | Muegge #violations | Bioavailability Score |
| --- | --- | --- | --- | --- | --- | --- | --- | --- | --- | --- | --- | --- | --- |
| Molecule 3 | (5,12,13-Triaza-indeno[1,2-b]anthracen-13-yl)-acetic acid ethyl ester | 443275 | CCOC(=O)Cn1c2ccccc2c2c1nc1cc3ccccc3cc1n2 | C22H17N3O2 | 355.39 | Moderately soluble | High | 0 | 0 | 0 | 0 | 0 | 0.55 |
| Molecule 4 | 2,2'-(1-Phenyl-1H-1,2,4-triazole-3,5-diyl)bis-phenol | 443276 | Oc1ccccc1c1nn(c(n1)c1ccccc1O)c1ccccc1 | C20H15N3O2 | 329.35 | Moderately soluble | High | 0 | 0 | 0 | 0 | 0 | 0.55 |
| Molecule 5 | 4-Amino-1-piperidinecarboxylic acid | 445262 | NC1CCN(CC1)C(=O)O | C6H12N2O2 | 144.17 | Highly soluble | High | 0 | 1 | 0 | 0 | 2 | 0.55 |
| Molecule 6 | |  | C=CC1=C(C)/C(=C/c2[nH]c(c(c2C)CCC(=O)O)Cc2[nH]c(c(c2CCC(=O)O)C)/C=C/2\NC(=O)C(=C2C=C)C)/NC1=O | C33H36N4O6 | 584.66 | Moderately soluble | Low | 2 | 3 | 2 | 1 | 2 | 0.11 |
| Molecule 7 | 5-(3-Methyltriazen-1-yl)imidazole-4-carboxamide | 76953 | CN=NNc1nc[nH]c1C(=O)N | C5H8N6O | 168.16 | Very soluble | High | 0 | 0 | 0 | 0 | 1 | 0.55 |
| Molecule 8 | |  | CCOC12CC=CC(=O)C2(C)C2C(CC1O)C13OCC4C5(C(C3=O)C3(O1)C(CC2)(O)C(=O)OC3(C)C(C5)OC4=O)C | C30H36O11 | 572.6 | Soluble | Low | 2 | 3 | 1 | 1 | 3 | 0.17 |
| Molecule 9 | 5-N-Methyloxaluric acid | 443075 | CNC(=O)NC(=O)C(=O)O | C4H6N2O4 | 146.1 | Very soluble | High | 0 | 4 | 0 | 0 | 2 | 0.56 |
| Molecule 10 | alpha-Corocalene | 5316074 | CC1=Cc2c(CC1)c(C)ccc2C(C)C | C15H20 | 200.32 | Moderately soluble | Low | 1 | 0 | 0 | 0 | 1 | 0.55 |
| Molecule 11 | alpha-Eucaine | 5282357 | COC(=O)C1(OC(=O)c2ccccc2)CC(C)(C)N(C(C1)(C)C)C | C19H27NO4 | 333.42 | Soluble | High | 0 | 0 | 0 | 0 | 0 | 0.55 |
| Molecule 12 | Ankorine | 442166 | OCC[C@H]1C[C@@H]2N(C[C@@H]1CC)CCc1c2cc(OC)c(c1O)OC | C19H29NO4 | 335.44 | Soluble | High | 0 | 0 | 0 | 0 | 0 | 0.55 |
| Molecule 13 | |  |  |  | 0 | Soluble | High | 0 | 0 | 0 | 0 | 0 | 0.55 |
| Molecule 14 | |  | COc1cc(ccc1OC)N(C(=O)c1ccc(cc1)[N+](=O)[O-])CCCN(CCc1ccc(c(c1)OC)OC)C.Cl | C29H36ClN3O7 | 574.07 | Poorly soluble | Low | 1 | 4 | 1 | 0 | 1 | 0.55 |
| Molecule 15 | Cabergoline | 54746 | C=CCN1C[C@@H](C[C@H]2[C@H]1Cc1c[nH]c3c1c2ccc3)C(=O)N(C(=O)NCC)CCCN(C)C | C26H37N5O2 | 451.6 | Moderately soluble | High | 0 | 1 | 1 | 0 | 0 | 0.55 |
| Molecule 16 | Cyclopentolate | 2905 | CN(CCOC(=O)C(C1(O)CCCC1)c1ccccc1)C | C17H25NO3 | 291.39 | Soluble | High | 0 | 0 | 0 | 0 | 0 | 0.55 |
| Molecule 17 | |  | OC[C@H]([C@H](Cc1ncc(nc1)[C@H]([C@@H]([C@@H](CO)O)O)O)O)O | C12H20N2O7 | 304.3 | Highly soluble | Low | 1 | 1 | 1 | 1 | 3 | 0.55 |
| Molecule 18 | |  | Oc1ccc(cc1)C[C@@H](C(=O)N1CCC[C@H]1C(=O)N[C@H](C(=O)N[C@H](C(=O)N)Cc1ccccc1)Cc1ccccc1)N | C32H37N5O5 | 571.67 | Moderately soluble | Low | 1 | 3 | 2 | 1 | 1 | 0.55 |
| Molecule 19 | Ergosine | 105137 | CC(C[C@H]1C(=O)N2CCC[C@H]2[C@]2(N1C(=O)[C@](O2)(C)NC(=O)[C@H]1CN(C)[C@H]2C(=C1)c1cccc3c1c(C2)c[nH]3)O)C | C30H37N5O5 | 547.65 | Moderately soluble | High | 1 | 3 | 0 | 0 | 0 | 0.55 |
| Molecule 20 | |  | O[C@@H]1CC[C@]2([C@@H](C1)C[C@H]([C@@H]1[C@@H]2CC[C@]2([C@H]1CC[C@@H]2[C@@H](CCC(=O)NCC(=O)O)C)C)OS(=O)(=O)O)C | C26H43NO8S | 529.69 | Soluble | Low | 1 | 3 | 1 | 1 | 1 | 0.11 |
| Molecule 21 | Heliotrine | 906426 | CO[C@@H]([C@](C(=O)OCC1=CCN2[C@H]1[C@@H](O)CC2)(C(C)C)O)C | C16H27NO5 | 313.39 | Very soluble | High | 0 | 0 | 0 | 0 | 0 | 0.55 |
| Molecule 22 | Icaceine | 441738 | CN(C1COC2C1(C)CCC1C2=C[C@@H]2[C@@H]3[C@]1(C)CC[C@@H]([C@@]3(C(=O)O2)C)O)C | C22H33NO4 | 375.5 | Soluble | High | 0 | 0 | 0 | 0 | 0 | 0.55 |
| Molecule 23 | Ion Formula | 24266 | [O-]P(=O)(F)[O-].[Na+].[Na+] | FNa2O3P | 143.95 | Soluble | High | 0 | 0 | 0 | 0 | 0 | 0.55 |
| Molecule 24 | L-3-Hydroxykynurenine | 11811 | OC(=O)[C@H](CC(=O)c1cccc(c1N)O)N | C10H12N2O4 | 224.21 | Highly soluble | High | 0 | 0 | 0 | 0 | 1 | 0.55 |
| Molecule 25 | Lomefloxacin | 3948 | CCn1cc(C(=O)O)c(=O)c2c1c(F)c(N1CCNC(C1)C)c(c2)F | C17H19F2N3O3 | 351.35 | Very soluble | High | 0 | 0 | 0 | 0 | 0 | 0.55 |
| Molecule 26 | Loxtidine | 55473 | OCc1nn(c(n1)NCCCOc1cccc(c1)CN1CCCCC1)C | C19H29N5O2 | 359.47 | Soluble | High | 0 | 0 | 0 | 0 | 0 | 0.55 |
| Molecule 27 | Melicopicine | 101253 | COc1c(OC)c(OC)c2c(c1OC)n(C)c1c(c2=O)cccc1 | C18H19NO5 | 329.35 | Soluble | High | 0 | 0 | 0 | 0 | 0 | 0.55 |
| Molecule 28 | Methyl 2-furoate | 11902 | COC(=O)c1ccco1 | C6H6O3 | 126.11 | Very soluble | High | 0 | 3 | 0 | 0 | 1 | 0.55 |
| Molecule 29 | |  | CC(=O)N[C@H](C(=O)N[C@H](C(=O)N[C@H](C(=O)O)C)C)CC[P+](=O)O | C12H21N3O7P+ | 350.28 | Highly soluble | Low | 0 | 1 | 2 | 1 | 1 | 0.55 |
| Molecule 30 | N-Methoxy-1-vinyl-beta-carboline | 639591 | C=Cc1nccc2c1n(OC)c1c2cccc1 | C14H12N2O | 224.26 | Soluble | High | 0 | 0 | 0 | 0 | 0 | 0.55 |
| Molecule 31 | N-Methyl-(R,S)-tetrahydrobenzylisoquinoline | 440630 | CN1CCc2c(C1Cc1ccccc1)cccc2 | C17H19N | 237.34 | Moderately soluble | High | 0 | 0 | 0 | 0 | 1 | 0.55 |
| Molecule 32 | |  | NCCCC(C(=O)O)NC(C(=O)O)CCC(=O)O | C10H18N2O6 | 262.26 | Highly soluble | Low | 0 | 1 | 1 | 1 | 1 | 0.56 |
| Molecule 33 | Oxacyclotetradecan-2-one | 15596 | O=C1CCCCCCCCCCCCO1 | C13H24O2 | 212.33 | Moderately soluble | High | 0 | 0 | 0 | 0 | 0 | 0.55 |
| Molecule 34 | Paroxetine | 43815 | Fc1ccc(cc1)[C@@H]1CCNC[C@H]1COc1ccc2c(c1)OCO2 | C19H20FNO3 | 329.37 | Moderately soluble | High | 0 | 0 | 0 | 0 | 0 | 0.55 |
| Molecule 35 | PS-5 | 196445 | CC[C@H]1C(=O)N2[C@@H]1CC(=C2C(=O)O)SCCNC(=O)C | C13H18N2O4S | 298.36 | Very soluble | High | 0 | 0 | 0 | 0 | 0 | 0.56 |
| Molecule 36 | Sinalexin | 85760249 | COn1c2sncc2c2c1cccc2 | C10H8N2OS | 204.25 | Soluble | High | 0 | 0 | 0 | 0 | 0 | 0.55 |
| Molecule 37 | Suberic acid | 10457 | OC(=O)CCCCCCC(=O)O | C8H14O4 | 174.19 | Very soluble | High | 0 | 0 | 0 | 0 | 1 | 0.85 |
| Molecule 38 | Trifluralin | 5569 | CCCN(c1c(cc(cc1[N+](=O)[O-])C(F)(F)F)[N+](=O)[O-])CCC | C13H16F3N3O4 | 335.28 | Moderately soluble | High | 0 | 0 | 0 | 0 | 1 | 0.55 |
| Molecule 39 | |  | OC(C(C(=O)O)NC(=O)C(C(C)C)N)CC1OC2N(C1)C(=O)C2 | C14H23N3O6 | 329.35 | Highly soluble | Low | 0 | 1 | 1 | 1 | 1 | 0.55 |
| Molecule 40 | Zerumbone oxide | 5463724 | O=C1/C=C/C(C)(C)CC2C(CC/C=C\1/C)(O2)C | C15H22O2 | 234.33 | Soluble | High | 0 | 0 | 0 | 0 | 0 | 0.55 |
