# Supplementary material
Source: Research Square preprint supplement (doi:10.21203/rs.3.rs-9566115/v1)
Supplement: Supplementary file 2 [file 9759904a1a4f1836a75c6cf0.docx]

**Table 1: DETAILED ADME ANALYSIS OF PHYTOCHEMICALS OF *LEKHANIYA MAHAKASHAYA***

| **PUB CHEM** | **PCID** | **ESOL Class** | **GI absorption** | **Lipinski # violations** | **Ghose # violations** | **Veber # violations** | **Egan # violations** | **Muegge # violations** | **Bioavailability Score** |
| --- | --- | --- | --- | --- | --- | --- | --- | --- | --- |
| (5,12,13-Triaza-indeno[1,2-b]anthracen-13-yl)-acetic acid ethyl ester | 443275 | Moderately soluble | High |  | 0 | 0 | 0 | 0 | 0.55 |
| 2,2'-(1-Phenyl-1H-1,2,4-triazole-3,5-diyl)bis-phenol | 443276 | Moderately soluble | High | 0 | 0 | 0 | 0 | 0 | 0.55 |
| 4-Amino-1-piperidinecarboxylic acid | 445262 | Highly soluble | High | 0 | 1 | 0 | 0 | 2 | 0.55 |
| 5-(3-Methyltriazen-1-yl)imidazole-4-carboxamide | 76953 | Very soluble | High | 0 | 0 | 0 | 0 | 1 | 0.55 |
| 5-N-Methyloxaluric acid | 443075 | Very soluble | High | 0 | 4 | 0 | 0 | 2 | 0.56 |
| alpha-Corocalene | 5316074 | Moderately soluble | Low | 1 | 0 | 0 | 0 | 1 | 0.55 |
| alpha-Eucaine | 5282357 | Soluble | High | 0 | 0 | 0 | 0 | 0 | 0.55 |
| Ankorine | 442166 | Soluble | High | 0 | 0 | 0 | 0 | 0 | 0.55 |
| Cabergoline | 54746 | Moderately soluble | High | 0 | 1 | 1 | 0 | 0 | 0.55 |
| Cyclopentolate | 2905 | Soluble | High | 0 | 0 | 0 | 0 | 0 | 0.55 |
| Ergosine | 105137 | Moderately soluble | High | 1 | 3 | 0 | 0 | 0 | 0.55 |
| Heliotrine | 906426 | Very soluble | High | 0 | 0 | 0 | 0 | 0 | 0.55 |
| Icaceine | 441738 | Soluble | High | 0 | 0 | 0 | 0 | 0 | 0.55 |
| Ion Formula | 24266 | Soluble | High | 0 | 0 | 0 | 0 | 0 | 0.55 |
| L-3-Hydroxykynurenine | 11811 | Highly soluble | High | 0 | 0 | 0 | 0 | 1 | 0.55 |
| Lomefloxacin | 3948 | Very soluble | High | 0 | 0 | 0 | 0 | 0 | 0.55 |
| Loxtidine | 55473 | Soluble | High | 0 | 0 | 0 | 0 | 0 | 0.55 |
| Melicopicine | 101253 | Soluble | High | 0 | 0 | 0 | 0 | 0 | 0.55 |
| Methyl 2-furoate | 11902 | Very soluble | High | 0 | 3 | 0 | 0 | 1 | 0.55 |
| N-Methoxy-1-vinyl-beta-carboline | 639591 | Soluble | High | 0 | 0 | 0 | 0 | 0 | 0.55 |
| N-Methyl-(R,S)-tetrahydrobenzylisoquinoline | 440630 | Moderately soluble | High | 0 | 0 | 0 | 0 | 1 | 0.55 |
| Oxacyclotetradecan-2-one | 15596 | Moderately soluble | High | 0 | 0 | 0 | 0 | 0 | 0.55 |
| Paroxetine | 43815 | Moderately soluble | High | 0 | 0 | 0 | 0 | 0 | 0.55 |
| PS-5 | 196445 | Very soluble | High | 0 | 0 | 0 | 0 | 0 | 0.56 |
| Sinalexin | 85760249 | Soluble | High | 0 | 0 | 0 | 0 | 0 | 0.55 |
| Suberic acid | 10457 | Very soluble | High | 0 | 0 | 0 | 0 | 1 | 0.85 |
| Trifluralin | 5569 | Moderately soluble | High | 0 | 0 | 0 | 0 | 1 | 0.55 |
| Zerumbone oxide | 5463724 | Soluble | High | 0 | 0 | 0 | 0 | 0 | 0.55 |
