# Supplementary material
Source: Research Square preprint supplement (doi:10.21203/rs.3.rs-9566115/v1)
Supplement: Supplementary file 3 [file f28995ee9e6d0cb0d3fbc016.docx]

| **Target** | **Common name** | **Uniprot ID** | **ChEMBL ID** | **Target Class** | **Probability*** | **Known actives (3D/2D)** |
| --- | --- | --- | --- | --- | --- | --- |
| Aldose reductase (by homology) | AKR1B1 | P15121 | CHEMBL1900 | Enzyme | 0.153290397 | 0 / 6Â Â Â Â Â |
| Isocitrate dehydrogenase [NADP] cytoplasmic | IDH1 | O75874 | CHEMBL2007625 | Enzyme | 0.113285953 | 235 / 0Â Â Â Â Â |
| Matrix metalloproteinase 2 | MMP2 | P08253 | CHEMBL333 | Protease | 0.113285953 | 67 / 0Â Â Â Â Â |
| Metabotropic glutamate receptor 5 (by homology) | GRM5 | P41594 | CHEMBL3227 | Family C G protein-coupled receptor | 0.113285953 | 949 / 0Â Â Â Â Â |
| Cyclooxygenase-1 | PTGS1 | P23219 | CHEMBL221 | Oxidoreductase | 0.113285953 | 74 / 0Â Â Â Â Â |
| Cyclooxygenase-2 | PTGS2 | P35354 | CHEMBL230 | Oxidoreductase | 0.113285953 | 316 / 0Â Â Â Â Â |
| Serotonin 2b (5-HT2b) receptor | HTR2B | P41595 | CHEMBL1833 | Family A G protein-coupled receptor | 0.113285953 | 56 / 0Â Â Â Â Â |
| Serotonin 2a (5-HT2a) receptor | HTR2A | P28223 | CHEMBL224 | Family A G protein-coupled receptor | 0.113285953 | 126 / 0Â Â Â Â Â |
| Serotonin 2c (5-HT2c) receptor | HTR2C | P28335 | CHEMBL225 | Family A G protein-coupled receptor | 0.113285953 | 111 / 0Â Â Â Â Â |
| MAP kinase p38 alpha | MAPK14 | Q16539 | CHEMBL260 | Kinase | 0.113285953 | 689 / 0Â Â Â Â Â |
| Cathepsin K | CTSK | P43235 | CHEMBL268 | Protease | 0.113285953 | 216 / 0Â Â Â Â Â |
| Cytochrome P450 26A1 | CYP26A1 | O43174 | CHEMBL5141 | Cytochrome P450 | 0.113285953 | 36 / 0Â Â Â Â Â |
| Dihydroorotate dehydrogenase | DHODH | Q02127 | CHEMBL1966 | Oxidoreductase | 0.113285953 | 44 / 0Â Â Â Â Â |
| Bcl2-antagonist of cell death (BAD) | BAD | Q92934 | CHEMBL3817 | Other cytosolic protein | 0.113285953 | 10 / 0Â Â Â Â Â |
| Induced myeloid leukemia cell differentiation protein Mcl-1 | MCL1 | Q07820 | CHEMBL4361 | Other cytosolic protein | 0.113285953 | 17 / 0Â Â Â Â Â |
| Apoptosis regulator Bcl-X | BCL2L1 | Q07817 | CHEMBL4625 | Other ion channel | 0.113285953 | 11 / 0Â Â Â Â Â |
| Apoptosis regulator Bcl-W | BCL2L2 | Q92843 | CHEMBL4677 | Other cytosolic protein | 0.113285953 | 2 / 0Â Â Â Â Â |
| Apoptosis regulator Bcl-2 | BCL2 | P10415 | CHEMBL4860 | Other ion channel | 0.113285953 | 20 / 0Â Â Â Â Â |
| Bcl-2-like protein 10 | BCL2L10 | Q9HD36 | CHEMBL5988 | Unclassified protein | 0.113285953 | 1 / 0Â Â Â Â Â |
| Bcl-2-related protein A1 | BCL2A1 | Q16548 | CHEMBL6044 | Unclassified protein | 0.113285953 | 7 / 0Â Â Â Â Â |
| Tyrosine-protein kinase JAK2 | JAK2 | O60674 | CHEMBL2971 | Kinase | 0.113285953 | 209 / 51Â Â Â Â Â |
| Corticotropin releasing factor receptor 1 | CRHR1 | P34998 | CHEMBL1800 | Family B G protein-coupled receptor | 0.113285953 | 334 / 0Â Â Â Â Â |
| Signal transducer and activator of transcription 3 | STAT3 | P40763 | CHEMBL4026 | Transcription factor | 0.113285953 | 40 / 0Â Â Â Â Â |
| Dual specificity phosphatase Cdc25B | CDC25B | P30305 | CHEMBL4804 | Phosphatase | 0.113285953 | 22 / 0Â Â Â Â Â |
| Translocator protein (by homology) | TSPO | P30536 | CHEMBL5742 | Membrane receptor | 0.113285953 | 364 / 0Â Â Â Â Â |
| Muscarinic acetylcholine receptor M4 | CHRM4 | P08173 | CHEMBL1821 | Family A G protein-coupled receptor | 0.113285953 | 28 / 0Â Â Â Â Â |
| Muscarinic acetylcholine receptor M5 | CHRM5 | P08912 | CHEMBL2035 | Family A G protein-coupled receptor | 0.113285953 | 8 / 0Â Â Â Â Â |
| Muscarinic acetylcholine receptor M3 | CHRM3 | P20309 | CHEMBL245 | Family A G protein-coupled receptor | 0.113285953 | 73 / 0Â Â Â Â Â |
| Focal adhesion kinase 1 | PTK2 | Q05397 | CHEMBL2695 | Kinase | 0.113285953 | 42 / 0Â Â Â Â Â |
| Monoglyceride lipase | MGLL | Q99685 | CHEMBL4191 | Enzyme | 0.113285953 | 49 / 0Â Â Â Â Â |
| Proto-oncogene tyrosine-protein kinase MER | MERTK | Q12866 | CHEMBL5331 | Kinase | 0.113285953 | 5 / 0Â Â Â Â Â |
| Monoamine oxidase A | MAOA | P21397 | CHEMBL1951 | Oxidoreductase | 0.113285953 | 112 / 0Â Â Â Â Â |
| Metabotropic glutamate receptor 4 | GRM4 | Q14833 | CHEMBL2736 | Family C G protein-coupled receptor | 0.113285953 | 95 / 0Â Â Â Â Â |
| Phosphodiesterase 10A | PDE10A | Q9Y233 | CHEMBL4409 | Phosphodiesterase | 0.113285953 | 1081 / 0Â Â Â Â Â |
| c-Jun N-terminal kinase 3 | MAPK10 | P53779 | CHEMBL2637 | Kinase | 0.113285953 | 106 / 0Â Â Â Â Â |
| Androgen Receptor | AR | P10275 | CHEMBL1871 | Nuclear receptor | 0.113285953 | 46 / 0Â Â Â Â Â |
| Kynureninase | KYNU | Q16719 | CHEMBL5100 | Enzyme | 0.113285953 | 1 / 0Â Â Â Â Â |
| Metabotropic glutamate receptor 2 | GRM2 | Q14416 | CHEMBL5137 | Family C G protein-coupled receptor | 0.113285953 | 75 / 0Â Â Â Â Â |
| Smoothened homolog | SMO | Q99835 | CHEMBL5971 | Frizzled family G protein-coupled receptor | 0.113285953 | 61 / 0Â Â Â Â Â |
| Acetylcholinesterase | ACHE | P22303 | CHEMBL220 | Hydrolase | 0.113285953 | 165 / 0Â Â Â Â Â |
| Transitional endoplasmic reticulum ATPase | VCP | P55072 | CHEMBL1075145 | Primary active transporter | 0.113285953 | 58 / 0Â Â Â Â Â |
| Carboxypeptidase B | CPB1 | P15086 | CHEMBL2552 | Protease | 0.113285953 | 3 / 0Â Â Â Â Â |
| Phosphodiesterase 5A | PDE5A | O76074 | CHEMBL1827 | Phosphodiesterase | 0.113285953 | 196 / 0Â Â Â Â Â |
| Hypoxia-inducible factor 1 alpha | HIF1A | Q16665 | CHEMBL4261 | Transcription factor | 0.113285953 | 24 / 0Â Â Â Â Â |
| N-acylsphingosine-amidohydrolase (by homology) | NAAA | Q02083 | CHEMBL4349 | Enzyme | 0.113285953 | 33 / 0Â Â Â Â Â |
| Prostaglandin E synthase | PTGES | O14684 | CHEMBL5658 | Enzyme | 0.113285953 | 54 / 0Â Â Â Â Â |
| Cyclin-dependent kinase 5/CDK5 activator 1 | CDK5R1 CDK5 | Q15078 Q00535 | CHEMBL1907600 | Kinase | 0.113285953 | 110 / 0Â Â Â Â Â |
| Anandamide amidohydrolase | FAAH | O00519 | CHEMBL2243 | Enzyme | 0.113285953 | 202 / 0Â Â Â Â Â |
| Serine/threonine-protein kinase PLK1 | PLK1 | P53350 | CHEMBL3024 | Kinase | 0.113285953 | 38 / 0Â Â Â Â Â |
| G-protein coupled receptor 39 | GPR39 | O43194 | CHEMBL3091266 | Family A G protein-coupled receptor | 0.113285953 | 12 / 0Â Â Â Â Â |
| Neurokinin 3 receptor | TACR3 | P29371 | CHEMBL4429 | Family A G protein-coupled receptor | 0.113285953 | 146 / 0Â Â Â Â Â |
| Serine/threonine-protein kinase PLK2 | PLK2 | Q9NYY3 | CHEMBL5938 | Kinase | 0.113285953 | 10 / 0Â Â Â Â Â |
| Neurokinin 1 receptor | TACR1 | P25103 | CHEMBL249 | Family A G protein-coupled receptor | 0.113285953 | 85 / 0Â Â Â Â Â |
| Tyrosine-protein kinase LCK | LCK | P06239 | CHEMBL258 | Kinase | 0.113285953 | 127 / 0Â Â Â Â Â |
| Cholecystokinin B receptor | CCKBR | P32239 | CHEMBL298 | Family A G protein-coupled receptor | 0.113285953 | 287 / 0Â Â Â Â Â |
| Autotaxin | ENPP2 | Q13822 | CHEMBL3691 | Enzyme | 0.113285953 | 3 / 0Â Â Â Â Â |
| ADAMTS5 | ADAMTS5 | Q9UNA0 | CHEMBL2285 | Protease | 0.113285953 | 28 / 0Â Â Â Â Â |
| Hexokinase type IV | GCK | P35557 | CHEMBL3820 | Enzyme | 0.113285953 | 136 / 0Â Â Â Â Â |
| Serine/threonine-protein kinase 17B | STK17B | O94768 | CHEMBL3980 | Kinase | 0.113285953 | 2 / 0Â Â Â Â Â |
| Menin | MEN1 | O00255 | CHEMBL1615381 | Unclassified protein | 0.113285953 | 9 / 0Â Â Â Â Â |
| FK506-binding protein 1A | FKBP1A | P62942 | CHEMBL1902 | Isomerase | 0.113285953 | 94 / 0Â Â Â Â Â |
| Serine/threonine-protein kinase RAF | RAF1 | P04049 | CHEMBL1906 | Kinase | 0.113285953 | 49 / 0Â Â Â Â Â |
| Estrogen receptor alpha | ESR1 | P03372 | CHEMBL206 | Nuclear receptor | 0.113285953 | 29 / 0Â Â Â Â Â |
| SUMO-activating enzyme | SAE1 UBA2 | Q9UBE0 Q9UBT2 | CHEMBL2095174 | Enzyme | 0.113285953 | 12 / 0Â Â Â Â Â |
| Histamine H3 receptor | HRH3 | Q9Y5N1 | CHEMBL264 | Family A G protein-coupled receptor | 0.113285953 | 41 / 0Â Â Â Â Â |
| Estradiol 17-beta-dehydrogenase 2 | HSD17B2 | P37059 | CHEMBL2789 | Enzyme | 0.113285953 | 24 / 0Â Â Â Â Â |
| Histamine H4 receptor | HRH4 | Q9H3N8 | CHEMBL3759 | Family A G protein-coupled receptor | 0.113285953 | 26 / 0Â Â Â Â Â |
| Heat shock protein HSP 90-alpha | HSP90AA1 | P07900 | CHEMBL3880 | Other cytosolic protein | 0.113285953 | 26 / 0Â Â Â Â Â |
| c-Jun N-terminal kinase 2 | MAPK9 | P45984 | CHEMBL4179 | Kinase | 0.113285953 | 77 / 0Â Â Â Â Â |
| Dopamine D3 receptor | DRD3 | P35462 | CHEMBL234 | Family A G protein-coupled receptor | 0.113285953 | 60 / 0Â Â Â Â Â |
| P2X purinoceptor 3 | P2RX3 | P56373 | CHEMBL2998 | Ligand-gated ion channel | 0.113285953 | 33 / 0Â Â Â Â Â |
| Cytochrome P450 2C9 | CYP2C9 | P11712 | CHEMBL3397 | Cytochrome P450 | 0.113285953 | 11 / 0Â Â Â Â Â |
| Cytochrome P450 3A4 | CYP3A4 | P08684 | CHEMBL340 | Cytochrome P450 | 0.113285953 | 7 / 0Â Â Â Â Â |
| Cytochrome P450 2C19 | CYP2C19 | P33261 | CHEMBL3622 | Cytochrome P450 | 0.113285953 | 7 / 0Â Â Â Â Â |
| Gamma-secretase | PSEN2 PSENEN NCSTN APH1A PSEN1 APH1B | P49810 Q9NZ42 Q92542 Q96BI3 P49768 Q8WW43 | CHEMBL2094135 | Protease | 0.113285953 | 167 / 0Â Â Â Â Â |
| Cathepsin L | CTSL | P07711 | CHEMBL3837 | Protease | 0.113285953 | 130 / 0Â Â Â Â Â |
| 1-acylglycerol-3-phosphate O-acyltransferase beta | AGPAT2 | O15120 | CHEMBL4772 | Enzyme | 0.113285953 | 32 / 0Â Â Â Â Â |
| Leucine-rich repeat serine/threonine-protein kinase 2 | LRRK2 | Q5S007 | CHEMBL1075104 | Kinase | 0.113285953 | 44 / 0Â Â Â Â Â |
| Receptor protein-tyrosine kinase erbB-2 | ERBB2 | P04626 | CHEMBL1824 | Kinase | 0.113285953 | 84 / 0Â Â Â Â Â |
| Cyclin-dependent kinase 1 | CDK1 | P06493 | CHEMBL308 | Kinase | 0.113285953 | 64 / 0Â Â Â Â Â |
| Vascular endothelial growth factor receptor 2 | KDR | P35968 | CHEMBL279 | Kinase | 0.113285953 | 449 / 3Â Â Â Â Â |
| Protein farnesyltransferase | FNTA FNTB | P49354 P49356 | CHEMBL2094108 | Enzyme | 0.113285953 | 260 / 0Â Â Â Â Â |
| GABA-A receptor; alpha-6/beta-3/gamma-2 | GABRG2 GABRB3 GABRA6 | P18507 P28472 Q16445 | CHEMBL2095190 | Ligand-gated ion channel | 0.113285953 | 30 / 0Â Â Â Â Â |
| Microtubule-associated protein 2 | MAP2 | P11137 | CHEMBL2390810 | Unclassified protein | 0.113285953 | 1 / 0Â Â Â Â Â |
| Methionine aminopeptidase 1 | METAP1 | P53582 | CHEMBL2474 | Protease | 0.113285953 | 13 / 0Â Â Â Â Â |
| Cytochrome P450 17A1 | CYP17A1 | P05093 | CHEMBL3522 | Cytochrome P450 | 0.113285953 | 74 / 0Â Â Â Â Â |
| ATP-binding cassette sub-family G member 2 | ABCG2 | Q9UNQ0 | CHEMBL5393 | Primary active transporter | 0.113285953 | 33 / 0Â Â Â Â Â |
| Axin1/beta-catenin | CTNNB1 | P35222 | CHEMBL5866 | Unclassified protein | 0.113285953 | 0 / 3Â Â Â Â Â |
| Vascular endothelial growth factor receptor 1 | FLT1 | P17948 | CHEMBL1868 | Kinase | 0.113285953 | 125 / 0Â Â Â Â Â |
| Cyclin-dependent kinase 1/cyclin B | CCNB3 CDK1 CCNB1 CCNB2 | Q8WWL7 P06493 P14635 O95067 | CHEMBL2094127 | Other cytosolic protein | 0.113285953 | 65 / 0Â Â Â Â Â |
| Cyclin-dependent kinase 2/cyclin A | CDK2 CCNA1 CCNA2 | P24941 P78396 P20248 | CHEMBL2094128 | Other cytosolic protein | 0.113285953 | 76 / 0Â Â Â Â Â |
| Urokinase-type plasminogen activator | PLAU | P00749 | CHEMBL3286 | Protease | 0.113285953 | 7 / 0Â Â Â Â Â |
| Methionine aminopeptidase 2 | METAP2 | P50579 | CHEMBL3922 | Protease | 0.113285953 | 38 / 0Â Â Â Â Â |
| Prostanoid EP1 receptor | PTGER1 | P34995 | CHEMBL1811 | Family A G protein-coupled receptor | 0.113285953 | 54 / 0Â Â Â Â Â |
| Tyrosine-protein kinase ABL | ABL1 | P00519 | CHEMBL1862 | Kinase | 0.113285953 | 180 / 0Â Â Â Â Â |
| Platelet-derived growth factor receptor | PDGFRA PDGFRB | P16234 P09619 | CHEMBL2095189 | Kinase | 0.113285953 | 33 / 0Â Â Â Â Â |
| GABA A receptor alpha-4/beta-3/gamma-2 | GABRB3 GABRA4 GABRG2 | P28472 P48169 P18507 | CHEMBL2111366 | Ligand-gated ion channel | 0.113285953 | 6 / 0Â Â Â Â Â |
| GABA A receptor alpha-2/beta-2/gamma-2 | GABRA2 GABRB2 GABRG2 | P47869 P47870 P18507 | CHEMBL2111413 | Ligand-gated ion channel | 0.113285953 | 22 / 0Â Â Â Â Â |
| Tyrosine-protein kinase SRC | SRC | P12931 | CHEMBL267 | Kinase | 0.113285953 | 219 / 0Â Â Â Â Â |
| 5-lipoxygenase activating protein | ALOX5AP | P20292 | CHEMBL4550 | Other cytosolic protein | 0.113285953 | 78 / 0Â Â Â Â Â |
| Adenosine A2a receptor | ADORA2A | P29274 | CHEMBL251 | Family A G protein-coupled receptor | 0.12507596 | 79 / 0Â Â Â Â Â |
| c-Jun N-terminal kinase 1 | MAPK8 | P45983 | CHEMBL2276 | Kinase | 0.12507596 | 84 / 0Â Â Â Â Â |
| c-Jun N-terminal kinase 2 | MAPK9 | P45984 | CHEMBL4179 | Kinase | 0.12507596 | 45 / 0Â Â Â Â Â |
| Carbonic anhydrase II | CA2 | P00918 | CHEMBL205 | Lyase | 0.116739032 | 112 / 0Â Â Â Â Â |
| Carbonic anhydrase I | CA1 | P00915 | CHEMBL261 | Lyase | 0.116739032 | 90 / 0Â Â Â Â Â |
| Carbonic anhydrase XII | CA12 | O43570 | CHEMBL3242 | Lyase | 0.116739032 | 73 / 0Â Â Â Â Â |
| Carbonic anhydrase IX | CA9 | Q16790 | CHEMBL3594 | Lyase | 0.116739032 | 94 / 0Â Â Â Â Â |
| Adenosine A1 receptor | ADORA1 | P30542 | CHEMBL226 | Family A G protein-coupled receptor | 0.116739032 | 83 / 0Â Â Â Â Â |
| Dopamine transporter (by homology) | SLC6A3 | Q01959 | CHEMBL238 | Electrochemical transporter | 0.128898633 | 1376 / 677Â Â Â Â Â |
| Butyrylcholinesterase | BCHE | P06276 | CHEMBL1914 | Hydrolase | 0.112748418 | 44 / 29Â Â Â Â Â |
| Neuronal acetylcholine receptor protein alpha-7 subunit | CHRNA7 | P36544 | CHEMBL2492 | Ligand-gated ion channel | 0.104671941 | 118 / 16Â Â Â Â Â |
| Serotonin transporter | SLC6A4 | P31645 | CHEMBL228 | Electrochemical transporter | 0.104671941 | 1397 / 418Â Â Â Â Â |
| HERG | KCNH2 | Q12809 | CHEMBL240 | Voltage-gated ion channel | 0.104671941 | 373 / 19Â Â Â Â Â |
| Muscarinic acetylcholine receptor M2 | CHRM2 | P08172 | CHEMBL211 | Family A G protein-coupled receptor | 0.104671941 | 346 / 114Â Â Â Â Â |
| Muscarinic acetylcholine receptor M1 | CHRM1 | P11229 | CHEMBL216 | Family A G protein-coupled receptor | 0.104671941 | 464 / 195Â Â Â Â Â |
| Muscarinic acetylcholine receptor M3 | CHRM3 | P20309 | CHEMBL245 | Family A G protein-coupled receptor | 0.104671941 | 286 / 80Â Â Â Â Â |
| Sigma opioid receptor | SIGMAR1 | Q99720 | CHEMBL287 | Membrane receptor | 0.104671941 | 758 / 77Â Â Â Â Â |
| Norepinephrine transporter | SLC6A2 | P23975 | CHEMBL222 | Electrochemical transporter | 0.104671941 | 540 / 58Â Â Â Â Â |
| Muscarinic acetylcholine receptor M4 | CHRM4 | P08173 | CHEMBL1821 | Family A G protein-coupled receptor | 0.104671941 | 131 / 34Â Â Â Â Â |
| Telomerase reverse transcriptase | TERT | O14746 | CHEMBL2916 | Enzyme | 0.104671941 | 13 / 0Â Â Â Â Â |
| Serotonin 1f (5-HT1f) receptor | HTR1F | P30939 | CHEMBL1805 | Family A G protein-coupled receptor | 0.104671941 | 64 / 0Â Â Â Â Â |
| Tyrosine-protein kinase JAK3 | JAK3 | P52333 | CHEMBL2148 | Kinase | 0.104671941 | 33 / 0Â Â Â Â Â |
| Tyrosine-protein kinase JAK2 | JAK2 | O60674 | CHEMBL2971 | Kinase | 0.104671941 | 58 / 0Â Â Â Â Â |
| Serotonin 7 (5-HT7) receptor | HTR7 | P34969 | CHEMBL3155 | Family A G protein-coupled receptor | 0.104671941 | 332 / 0Â Â Â Â Â |
| Transient receptor potential cation channel subfamily M member 8 (by homology) | TRPM8 | Q7Z2W7 | CHEMBL1075319 | Voltage-gated ion channel | 0.104671941 | 7 / 0Â Â Â Â Â |
| Lysosomal Pro-X carboxypeptidase | PRCP | P42785 | CHEMBL2335 | Protease | 0.104671941 | 45 / 0Â Â Â Â Â |
| Rho-associated protein kinase 2 | ROCK2 | O75116 | CHEMBL2973 | Kinase | 0.104671941 | 83 / 0Â Â Â Â Â |
| Rho-associated protein kinase 1 | ROCK1 | Q13464 | CHEMBL3231 | Kinase | 0.104671941 | 40 / 0Â Â Â Â Â |
| Transient receptor potential cation channel subfamily A member 1 | TRPA1 | O75762 | CHEMBL6007 | Voltage-gated ion channel | 0.104671941 | 3 / 0Â Â Â Â Â |
| Vanilloid receptor | TRPV1 | Q8NER1 | CHEMBL4794 | Voltage-gated ion channel | 0.104671941 | 10 / 0Â Â Â Â Â |
| Dopamine D3 receptor | DRD3 | P35462 | CHEMBL234 | Family A G protein-coupled receptor | 0.104671941 | 521 / 38Â Â Â Â Â |
| Phosphodiesterase 8B | PDE8B | O95263 | CHEMBL4408 | Phosphodiesterase | 0.104671941 | 3 / 0Â Â Â Â Â |
| Muscarinic acetylcholine receptor M5 | CHRM5 | P08912 | CHEMBL2035 | Family A G protein-coupled receptor | 0.104671941 | 135 / 23Â Â Â Â Â |
| Platelet-derived growth factor receptor beta | PDGFRB | P09619 | CHEMBL1913 | Kinase | 0.104671941 | 21 / 0Â Â Â Â Â |
| Vascular endothelial growth factor receptor 2 | KDR | P35968 | CHEMBL279 | Kinase | 0.104671941 | 57 / 0Â Â Â Â Â |
| Fibroblast growth factor receptor 1 | FGFR1 | P11362 | CHEMBL3650 | Kinase | 0.104671941 | 22 / 0Â Â Â Â Â |
| Tyrosine-protein kinase JAK1 | JAK1 | P23458 | CHEMBL2835 | Kinase | 0.104671941 | 45 / 0Â Â Â Â Â |
| Tyrosine-protein kinase TYK2 | TYK2 | P29597 | CHEMBL3553 | Kinase | 0.104671941 | 14 / 0Â Â Â Â Â |
| Endothelin-converting enzyme 1 | ECE1 | P42892 | CHEMBL4791 | Protease | 0.104671941 | 2 / 0Â Â Â Â Â |
| Poly [ADP-ribose] polymerase-1 | PARP1 | P09874 | CHEMBL3105 | Enzyme | 0.104671941 | 185 / 0Â Â Â Â Â |
| Histamine H4 receptor | HRH4 | Q9H3N8 | CHEMBL3759 | Family A G protein-coupled receptor | 0.104671941 | 221 / 0Â Â Â Â Â |
| Glycine transporter 1 | SLC6A9 | P48067 | CHEMBL2337 | Electrochemical transporter | 0.104671941 | 59 / 0Â Â Â Â Â |
| Melanocortin receptor 4 | MC4R | P32245 | CHEMBL259 | Family A G protein-coupled receptor | 0.104671941 | 22 / 0Â Â Â Â Â |
| Melanocortin receptor 1 | MC1R | Q01726 | CHEMBL3795 | Family A G protein-coupled receptor | 0.104671941 | 4 / 0Â Â Â Â Â |
| Melanocortin receptor 3 | MC3R | P41968 | CHEMBL4644 | Family A G protein-coupled receptor | 0.104671941 | 3 / 0Â Â Â Â Â |
| Nuclear receptor subfamily 1 group D member 1 | NR1D1 | P20393 | CHEMBL1961783 | Nuclear receptor | 0.104671941 | 6 / 0Â Â Â Â Â |
| Dipeptidyl peptidase IX | DPP9 | Q86TI2 | CHEMBL4793 | Protease | 0.104671941 | 96 / 0Â Â Â Â Â |
| Dipeptidyl peptidase II | DPP7 | Q9UHL4 | CHEMBL3976 | Protease | 0.104671941 | 97 / 0Â Â Â Â Â |
| Serotonin 2a (5-HT2a) receptor | HTR2A | P28223 | CHEMBL224 | Family A G protein-coupled receptor | 0.104671941 | 685 / 6Â Â Â Â Â |
| Serotonin 6 (5-HT6) receptor | HTR6 | P50406 | CHEMBL3371 | Family A G protein-coupled receptor | 0.104671941 | 198 / 3Â Â Â Â Â |
| TGF-beta receptor type I | TGFBR1 | P36897 | CHEMBL4439 | Kinase | 0.104671941 | 19 / 0Â Â Â Â Â |
| Dipeptidyl peptidase VIII | DPP8 | Q6V1X1 | CHEMBL4657 | Protease | 0.104671941 | 143 / 0Â Â Â Â Â |
| Serotonin 3a (5-HT3a) receptor | HTR3A | P46098 | CHEMBL1899 | Ligand-gated ion channel | 0.104671941 | 122 / 8Â Â Â Â Â |
| Ghrelin receptor | GHSR | Q92847 | CHEMBL4616 | Family A G protein-coupled receptor | 0.104671941 | 38 / 0Â Â Â Â Â |
| Dopamine D2 receptor | DRD2 | P14416 | CHEMBL217 | Family A G protein-coupled receptor | 0.104671941 | 1577 / 64Â Â Â Â Â |
| Dopamine D4 receptor | DRD4 | P21917 | CHEMBL219 | Family A G protein-coupled receptor | 0.104671941 | 358 / 34Â Â Â Â Â |
| Solute carrier family 22 member 2 | SLC22A2 | O15244 | CHEMBL1743122 | Electrochemical transporter | 0.104671941 | 1 / 0Â Â Â Â Â |
| Multidrug and toxin extrusion protein 1 | SLC47A1 | Q96FL8 | CHEMBL1743126 | Electrochemical transporter | 0.104671941 | 2 / 0Â Â Â Â Â |
| Protein farnesyltransferase | FNTA FNTB | P49354 P49356 | CHEMBL2094108 | Enzyme | 0.104671941 | 87 / 0Â Â Â Â Â |
| Serotonin 3 (5-HT3) receptor | HTR3B HTR3A | O95264 P46098 | CHEMBL2111332 | Ligand-gated ion channel | 0.104671941 | 1 / 0Â Â Â Â Â |
| Tyrosine-protein kinase SRC | SRC | P12931 | CHEMBL267 | Kinase | 0.104671941 | 39 / 0Â Â Â Â Â |
| Serotonin 1b (5-HT1b) receptor | HTR1B | P28222 | CHEMBL1898 | Family A G protein-coupled receptor | 0.104671941 | 247 / 3Â Â Â Â Â |
| Serotonin 1a (5-HT1a) receptor | HTR1A | P08908 | CHEMBL214 | Family A G protein-coupled receptor | 0.104671941 | 655 / 9Â Â Â Â Â |
| Transcriptional regulator ERG | ERG | P11308 | CHEMBL1293191 | Unclassified protein | 0.104671941 | 8 / 0Â Â Â Â Â |
| Serine/threonine-protein kinase PIM1 | PIM1 | P11309 | CHEMBL2147 | Kinase | 0.104671941 | 189 / 0Â Â Â Â Â |
| Serine/threonine-protein kinase PIM2 | PIM2 | Q9P1W9 | CHEMBL4523 | Kinase | 0.104671941 | 155 / 0Â Â Â Â Â |
| Neuropeptide Y receptor type 5 | NPY5R | Q15761 | CHEMBL4561 | Family A G protein-coupled receptor | 0.104671941 | 7 / 0Â Â Â Â Â |
| Cholecystokinin A receptor (by homology) | CCKAR | P32238 | CHEMBL1901 | Family A G protein-coupled receptor | 0.104671941 | 1 / 0Â Â Â Â Â |
| Sodium channel protein type IV alpha subunit | SCN4A | P35499 | CHEMBL2072 | Voltage-gated ion channel | 0.104671941 | 4 / 0Â Â Â Â Â |
| Geranylgeranyl transferase type I beta subunit | PGGT1B | P53609 | CHEMBL4135 | Enzyme | 0.104671941 | 6 / 0Â Â Â Â Â |
| Nitric-oxide synthase, brain | NOS1 | P29475 | CHEMBL3568 | Enzyme | 0.104671941 | 78 / 0Â Â Â Â Â |
| Nitric oxide synthase, inducible | NOS2 | P35228 | CHEMBL4481 | Enzyme | 0.104671941 | 51 / 0Â Â Â Â Â |
| Tyrosine-protein kinase receptor FLT3 | FLT3 | P36888 | CHEMBL1974 | Kinase | 0.104671941 | 30 / 0Â Â Â Â Â |
| C-X-C chemokine receptor type 7 | ACKR3 | P25106 | CHEMBL2010631 | Family A G protein-coupled receptor | 0.104671941 | 6 / 0Â Â Â Â Â |
| Cyclin-dependent kinase 2/cyclin A | CDK2 CCNA1 CCNA2 | P24941 P78396 P20248 | CHEMBL2094128 | Other cytosolic protein | 0.104671941 | 20 / 0Â Â Â Â Â |
| Quinone reductase 2 | NQO2 | P16083 | CHEMBL3959 | Enzyme | 0.104671941 | 26 / 0Â Â Â Â Â |
| Potassium/sodium hyperpolarization-activated cyclic nucleotide-gated channel 4 | HCN4 | Q9Y3Q4 | CHEMBL1250417 | Voltage-gated ion channel | 0.104671941 | 15 / 0Â Â Â Â Â |
| Potassium/sodium hyperpolarization-activated cyclic nucleotide-gated channel 1 | HCN1 | O60741 | CHEMBL1795171 | Voltage-gated ion channel | 0.104671941 | 16 / 0Â Â Â Â Â |
| Orexin receptor 2 | HCRTR2 | O43614 | CHEMBL4792 | Family A G protein-coupled receptor | 0.104671941 | 20 / 0Â Â Â Â Â |
| Orexin receptor 1 | HCRTR1 | O43613 | CHEMBL5113 | Family A G protein-coupled receptor | 0.104671941 | 16 / 0Â Â Â Â Â |
| Monoamine oxidase A | MAOA | P21397 | CHEMBL1951 | Oxidoreductase | 0.104671941 | 24 / 0Â Â Â Â Â |
| Tyrosine-protein kinase LCK | LCK | P06239 | CHEMBL258 | Kinase | 0.104671941 | 17 / 0Â Â Â Â Â |
| CaM kinase II | CAMK2D | Q13557 | CHEMBL2801 | Kinase | 0.104671941 | 9 / 0Â Â Â Â Â |
| 3-phosphoinositide dependent protein kinase-1 | PDPK1 | O15530 | CHEMBL2534 | Kinase | 0.104671941 | 8 / 0Â Â Â Â Â |
| Cyclin-dependent kinase 2 | CDK2 | P24941 | CHEMBL301 | Kinase | 0.104671941 | 15 / 0Â Â Â Â Â |
| Histamine H1 receptor | HRH1 | P35367 | CHEMBL231 | Family A G protein-coupled receptor | 0.104671941 | 183 / 7Â Â Â Â Â |
| Dopamine D5 receptor | DRD5 | P21918 | CHEMBL1850 | Family A G protein-coupled receptor | 0.104671941 | 39 / 0Â Â Â Â Â |
| Phospholipase D1 | PLD1 | Q13393 | CHEMBL2536 | Hydrolase | 0.104671941 | 55 / 0Â Â Â Â Â |
| Phospholipase D2 | PLD2 | O14939 | CHEMBL2734 | Hydrolase | 0.104671941 | 52 / 0Â Â Â Â Â |
| Mu opioid receptor | OPRM1 | P35372 | CHEMBL233 | Family A G protein-coupled receptor | 0.104671941 | 597 / 33Â Â Â Â Â |
| Baculoviral IAP repeat-containing protein 2 | BIRC2 | Q13490 | CHEMBL5462 | Enzyme | 0.104671941 | 66 / 0Â Â Â Â Â |
| Serotonin 1e (5-HT1e) receptor | HTR1E | P28566 | CHEMBL2182 | Family A G protein-coupled receptor | 0.104671941 | 9 / 0Â Â Â Â Â |
| Protein kinase C theta | PRKCQ | Q04759 | CHEMBL3920 | Kinase | 0.104671941 | 73 / 0Â Â Â Â Â |
| Alpha-2a adrenergic receptor | ADRA2A | P08913 | CHEMBL1867 | Family A G protein-coupled receptor | 0.104671941 | 43 / 4Â Â Â Â Â |
| Adrenergic receptor alpha-2 | ADRA2C | P18825 | CHEMBL1916 | Family A G protein-coupled receptor | 0.104671941 | 41 / 5Â Â Â Â Â |
| Alpha-2b adrenergic receptor | ADRA2B | P18089 | CHEMBL1942 | Family A G protein-coupled receptor | 0.104671941 | 28 / 4Â Â Â Â Â |
| Probable G-protein coupled receptor 142 | GPR142 | Q7Z601 | CHEMBL2069161 | Family A G protein-coupled receptor | 0.104671941 | 12 / 0Â Â Â Â Â |
| Bradykinin B2 receptor | BDKRB2 | P30411 | CHEMBL3157 | Family A G protein-coupled receptor | 0.104671941 | 7 / 0Â Â Â Â Â |
| Alpha-1a adrenergic receptor (by homology) | ADRA1A | P35348 | CHEMBL229 | Family A G protein-coupled receptor | 0.104671941 | 193 / 6Â Â Â Â Â |
| NAD-dependent deacetylase sirtuin 2 | SIRT2 | Q8IXJ6 | CHEMBL4462 | Eraser | 0.104671941 | 2 / 0Â Â Â Â Â |
| Translocator protein (by homology) | TSPO | P30536 | CHEMBL5742 | Membrane receptor | 0.104671941 | 25 / 0Â Â Â Â Â |
| Dipeptidyl peptidase IV | DPP4 | P27487 | CHEMBL284 | Protease | 0.104671941 | 832 / 2Â Â Â Â Â |
| MAP kinase p38 alpha | MAPK14 | Q16539 | CHEMBL260 | Kinase | 0.104671941 | 32 / 0Â Â Â Â Â |
| Serotonin 2c (5-HT2c) receptor | HTR2C | P28335 | CHEMBL225 | Family A G protein-coupled receptor | 0.104671941 | 332 / 6Â Â Â Â Â |
| C-X-C chemokine receptor type 4 | CXCR4 | P61073 | CHEMBL2107 | Family A G protein-coupled receptor | 0.104671941 | 8 / 0Â Â Â Â Â |
| Nitric-oxide synthase, endothelial | NOS3 | P29474 | CHEMBL4803 | Enzyme | 0.104671941 | 28 / 0Â Â Â Â Â |
| p53-binding protein Mdm-2 | MDM2 | Q00987 | CHEMBL5023 | Other nuclear protein | 0.104671941 | 31 / 0Â Â Â Â Â |
| Synaptic vesicular amine transporter (by homology) | SLC18A2 | Q05940 | CHEMBL1893 | Electrochemical transporter | 0.314668769 | 61 / 91Â Â Â Â Â |
| Adrenergic receptor alpha-2 | ADRA2C | P18825 | CHEMBL1916 | Family A G protein-coupled receptor | 0.217731049 | 61 / 31Â Â Â Â Â |
| Alpha-1a adrenergic receptor | ADRA1A | P35348 | CHEMBL229 | Family A G protein-coupled receptor | 0.217731049 | 177 / 52Â Â Â Â Â |
| P-glycoprotein 1 | ABCB1 | P08183 | CHEMBL4302 | Primary active transporter | 0.177362767 | 142 / 93Â Â Â Â Â |
| Dipeptidyl peptidase IV | DPP4 | P27487 | CHEMBL284 | Protease | 0.177362767 | 205 / 58Â Â Â Â Â |
| Alpha-2a adrenergic receptor | ADRA2A | P08913 | CHEMBL1867 | Family A G protein-coupled receptor | 0.177362767 | 69 / 20Â Â Â Â Â |
| Acetylcholinesterase | ACHE | P22303 | CHEMBL220 | Hydrolase | 0.120823672 | 63 / 251Â Â Â Â Â |
| Putative hydrolase RBBP9 | RBBP9 | O75884 | CHEMBL1075121 | Enzyme | 0.120823672 | 0 / 1Â Â Â Â Â |
| Poly [ADP-ribose] polymerase-1 | PARP1 | P09874 | CHEMBL3105 | Enzyme | 0.120823672 | 62 / 12Â Â Â Â Â |
| Alpha-1b adrenergic receptor | ADRA1B | P35368 | CHEMBL232 | Family A G protein-coupled receptor | 0.120823672 | 104 / 37Â Â Â Â Â |
| Dopamine D2 receptor | DRD2 | P14416 | CHEMBL217 | Family A G protein-coupled receptor | 0.120823672 | 564 / 973Â Â Â Â Â |
| Small conductance calcium-activated potassium channel protein 1 | KCNN1 | Q92952 | CHEMBL2369 | Voltage-gated ion channel | 0.120823672 | 0 / 1Â Â Â Â Â |
| Small conductance calcium-activated potassium channel protein 3 | KCNN3 | Q9UGI6 | CHEMBL3381 | Voltage-gated ion channel | 0.120823672 | 0 / 1Â Â Â Â Â |
| Small conductance calcium-activated potassium channel protein 2 | KCNN2 | Q9H2S1 | CHEMBL4469 | Voltage-gated ion channel | 0.120823672 | 0 / 1Â Â Â Â Â |
| Serotonin transporter (by homology) | SLC6A4 | P31645 | CHEMBL228 | Electrochemical transporter | 0.112748418 | 695 / 434Â Â Â Â Â |
| HERG | KCNH2 | Q12809 | CHEMBL240 | Voltage-gated ion channel | 0.112748418 | 402 / 126Â Â Â Â Â |
| Dopamine D1 receptor | DRD1 | P21728 | CHEMBL2056 | Family A G protein-coupled receptor | 0.112748418 | 54 / 191Â Â Â Â Â |
| Sigma opioid receptor | SIGMAR1 | Q99720 | CHEMBL287 | Membrane receptor | 0.112748418 | 296 / 431Â Â Â Â Â |
| Dopamine transporter | SLC6A3 | Q01959 | CHEMBL238 | Electrochemical transporter | 0.112748418 | 440 / 313Â Â Â Â Â |
| Kappa Opioid receptor | OPRK1 | P41145 | CHEMBL237 | Family A G protein-coupled receptor | 0.112748418 | 594 / 980Â Â Â Â Â |
| Serotonin 1a (5-HT1a) receptor | HTR1A | P08908 | CHEMBL214 | Family A G protein-coupled receptor | 0.104671941 | 282 / 264Â Â Â Â Â |
| Butyrylcholinesterase | BCHE | P06276 | CHEMBL1914 | Hydrolase | 0.104671941 | 13 / 48Â Â Â Â Â |
| Mu opioid receptor | OPRM1 | P35372 | CHEMBL233 | Family A G protein-coupled receptor | 0.104671941 | 832 / 1330Â Â Â Â Â |
| Delta opioid receptor | OPRD1 | P41143 | CHEMBL236 | Family A G protein-coupled receptor | 0.104671941 | 637 / 1196Â Â Â Â Â |
| Dopamine D3 receptor | DRD3 | P35462 | CHEMBL234 | Family A G protein-coupled receptor | 0.104671941 | 321 / 382Â Â Â Â Â |
| Adrenergic receptor beta | ADRB2 | P07550 | CHEMBL210 | Family A G protein-coupled receptor | 0.104671941 | 271 / 41Â Â Â Â Â |
| Beta-1 adrenergic receptor | ADRB1 | P08588 | CHEMBL213 | Family A G protein-coupled receptor | 0.104671941 | 236 / 29Â Â Â Â Â |
| Dopamine D4 receptor | DRD4 | P21917 | CHEMBL219 | Family A G protein-coupled receptor | 0.104671941 | 128 / 104Â Â Â Â Â |
| Dopamine D5 receptor | DRD5 | P21918 | CHEMBL1850 | Family A G protein-coupled receptor | 0.104671941 | 9 / 36Â Â Â Â Â |
| Histamine H3 receptor | HRH3 | Q9Y5N1 | CHEMBL264 | Family A G protein-coupled receptor | 0.104671941 | 195 / 225Â Â Â Â Â |
| Beta-3 adrenergic receptor | ADRB3 | P13945 | CHEMBL246 | Family A G protein-coupled receptor | 0.104671941 | 215 / 33Â Â Â Â Â |
| Alpha-1d adrenergic receptor | ADRA1D | P25100 | CHEMBL223 | Family A G protein-coupled receptor | 0.104671941 | 115 / 17Â Â Â Â Â |
| Serotonin 2a (5-HT2a) receptor | HTR2A | P28223 | CHEMBL224 | Family A G protein-coupled receptor | 0.104671941 | 343 / 271Â Â Â Â Â |
| Serotonin 7 (5-HT7) receptor | HTR7 | P34969 | CHEMBL3155 | Family A G protein-coupled receptor | 0.104671941 | 73 / 67Â Â Â Â Â |
| Neuronal acetylcholine receptor; alpha4/beta2 | CHRNA4 CHRNB2 | P43681 P17787 | CHEMBL1907589 | Ligand-gated ion channel | 0.104671941 | 20 / 21Â Â Â Â Â |
| Serine/threonine-protein kinase mTOR | MTOR | P42345 | CHEMBL2842 | Kinase | 0.104671941 | 201 / 0Â Â Â Â Â |
| PI3-kinase p110-alpha subunit | PIK3CA | P42336 | CHEMBL4005 | Enzyme | 0.104671941 | 253 / 0Â Â Â Â Â |
| Macrophage colony stimulating factor receptor | CSF1R | P07333 | CHEMBL1844 | Kinase | 0.104671941 | 54 / 0Â Â Â Â Â |
| Mitogen-activated protein kinase kinase kinase 12 | MAP3K12 | Q12852 | CHEMBL1908389 | Enzyme | 0.104671941 | 28 / 0Â Â Â Â Â |
| Phosphodiesterase 10A | PDE10A | Q9Y233 | CHEMBL4409 | Phosphodiesterase | 0.104671941 | 133 / 0Â Â Â Â Â |
| Nociceptin receptor | OPRL1 | P41146 | CHEMBL2014 | Family A G protein-coupled receptor | 0.104671941 | 235 / 90Â Â Â Â Â |
| Coagulation factor VII/tissue factor | F3 | P13726 | CHEMBL4081 | Surface antigen | 0.104671941 | 0 / 21Â Â Â Â Â |
| Interleukin-1 receptor-associated kinase 4 | IRAK4 | Q9NWZ3 | CHEMBL3778 | Kinase | 0.104671941 | 37 / 0Â Â Â Â Â |
| Serotonin 1b (5-HT1b) receptor | HTR1B | P28222 | CHEMBL1898 | Family A G protein-coupled receptor | 0.104671941 | 91 / 35Â Â Â Â Â |
| Norepinephrine transporter | SLC6A2 | P23975 | CHEMBL222 | Electrochemical transporter | 0.104671941 | 294 / 146Â Â Â Â Â |
| ATP-sensitive inward rectifier potassium channel 1 | KCNJ1 | P48048 | CHEMBL1293292 | Voltage-gated ion channel | 0.104671941 | 50 / 0Â Â Â Â Â |
| Purine nucleoside phosphorylase | PNP | P00491 | CHEMBL4338 | Enzyme | 0.104671941 | 20 / 0Â Â Â Â Â |
| Proto-oncogene c-JUN | JUN | P05412 | CHEMBL4977 | Transcription factor | 0.104671941 | 3 / 4Â Â Â Â Â |
| Neuronal acetylcholine receptor; alpha3/alpha6/beta2/beta3 | CHRNB3 CHRNA6 CHRNB2 CHRNA3 | Q05901 Q15825 P17787 P32297 | CHEMBL2109233 | Ligand-gated ion channel | 0.104671941 | 4 / 0Â Â Â Â Â |
| Neuronal acetylcholine receptor; alpha3/beta2 | CHRNA3 CHRNB2 | P32297 P17787 | CHEMBL2109234 | Ligand-gated ion channel | 0.104671941 | 5 / 1Â Â Â Â Â |
| MAP kinase signal-integrating kinase 2 | MKNK2 | Q9HBH9 | CHEMBL4204 | Kinase | 0.104671941 | 24 / 0Â Â Â Â Â |
| MAP kinase-interacting serine/threonine-protein kinase MNK1 | MKNK1 | Q9BUB5 | CHEMBL4718 | Kinase | 0.104671941 | 8 / 0Â Â Â Â Â |
| Cyclin-dependent kinase 4/cyclin D1 | CCND1 CDK4 | P24385 P11802 | CHEMBL1907601 | Kinase | 0.104671941 | 45 / 0Â Â Â Â Â |
| Cyclin-dependent kinase 2/cyclin E | CCNE2 CDK2 CCNE1 | O96020 P24941 P24864 | CHEMBL2094126 | Other cytosolic protein | 0.104671941 | 60 / 0Â Â Â Â Â |
| Serotonin 2b (5-HT2b) receptor | HTR2B | P41595 | CHEMBL1833 | Family A G protein-coupled receptor | 0.104671941 | 64 / 78Â Â Â Â Â |
| Insulin-like growth factor I receptor | IGF1R | P08069 | CHEMBL1957 | Kinase | 0.104671941 | 87 / 0Â Â Â Â Â |
| Vascular endothelial growth factor receptor 2 | KDR | P35968 | CHEMBL279 | Kinase | 0.104671941 | 200 / 0Â Â Â Â Â |
| Phosphodiesterase 9A | PDE9A | O76083 | CHEMBL3535 | Phosphodiesterase | 0.104671941 | 14 / 0Â Â Â Â Â |
| MAP kinase p38 beta | MAPK11 | Q15759 | CHEMBL3961 | Kinase | 0.104671941 | 19 / 0Â Â Â Â Â |
| Phosphodiesterase 1C | PDE1C | Q14123 | CHEMBL4619 | Phosphodiesterase | 0.104671941 | 12 / 0Â Â Â Â Â |
| Neuronal acetylcholine receptor; alpha3/beta4 | CHRNA3 CHRNB4 | P32297 P30926 | CHEMBL1907594 | Ligand-gated ion channel | 0.104671941 | 2 / 6Â Â Â Â Â |
| Tyrosine-protein kinase JAK1 | JAK1 | P23458 | CHEMBL2835 | Kinase | 0.104671941 | 94 / 0Â Â Â Â Â |
| Tyrosine-protein kinase receptor FLT3 | FLT3 | P36888 | CHEMBL1974 | Kinase | 0.104671941 | 56 / 0Â Â Â Â Â |
| Cyclin-dependent kinase 2/cyclin A | CDK2 CCNA1 CCNA2 | P24941 P78396 P20248 | CHEMBL2094128 | Other cytosolic protein | 0.104671941 | 31 / 0Â Â Â Â Â |
| Potassium channel subfamily K member 3 | KCNK3 | O14649 | CHEMBL2321613 | Voltage-gated ion channel | 0.104671941 | 8 / 0Â Â Â Â Â |
| Tyrosine-protein kinase JAK2 | JAK2 | O60674 | CHEMBL2971 | Kinase | 0.104671941 | 130 / 0Â Â Â Â Â |
| Multidrug and toxin extrusion protein 1 | SLC47A1 | Q96FL8 | CHEMBL1743126 | Electrochemical transporter | 0.104671941 | 3 / 1Â Â Â Â Â |
| S-methyl-5-thioadenosine phosphorylase | MTAP | Q13126 | CHEMBL4941 | Enzyme | 0.104671941 | 39 / 0Â Â Â Â Â |
| Leucine-rich repeat serine/threonine-protein kinase 2 | LRRK2 | Q5S007 | CHEMBL1075104 | Kinase | 0.104671941 | 32 / 0Â Â Â Â Â |
| Cyclin-dependent kinase 9 | CDK9 | P50750 | CHEMBL3116 | Kinase | 0.104671941 | 77 / 0Â Â Â Â Â |
| Serotonin 4 (5-HT4) receptor | HTR4 | Q13639 | CHEMBL1875 | Family A G protein-coupled receptor | 0.104671941 | 59 / 0Â Â Â Â Â |
| Serine/threonine-protein kinase PIM1 | PIM1 | P11309 | CHEMBL2147 | Kinase | 0.104671941 | 187 / 0Â Â Â Â Â |
| Serine/threonine-protein kinase PIM2 | PIM2 | Q9P1W9 | CHEMBL4523 | Kinase | 0.104671941 | 126 / 0Â Â Â Â Â |
| Dipeptidyl peptidase II | DPP7 | Q9UHL4 | CHEMBL3976 | Protease | 0.104671941 | 34 / 1Â Â Â Â Â |
| Heat shock protein HSP 90-beta | HSP90AB1 | P08238 | CHEMBL4303 | Other cytosolic protein | 0.104671941 | 43 / 0Â Â Â Â Â |
| Neuronal acetylcholine receptor protein alpha-7 subunit | CHRNA7 | P36544 | CHEMBL2492 | Ligand-gated ion channel | 0.104671941 | 15 / 5Â Â Â Â Â |
| Receptor protein-tyrosine kinase erbB-2 | ERBB2 | P04626 | CHEMBL1824 | Kinase | 0.104671941 | 43 / 0Â Â Â Â Â |
| Cyclin-dependent kinase 2/cyclin E1 | CCNE1 CDK2 | P24864 P24941 | CHEMBL1907605 | Kinase | 0.104671941 | 25 / 0Â Â Â Â Â |
| Dipeptidyl peptidase I | CTSC | P53634 | CHEMBL2252 | Protease | 0.104671941 | 11 / 0Â Â Â Â Â |
| Phosphodiesterase 11A | PDE11A | Q9HCR9 | CHEMBL2717 | Phosphodiesterase | 0.104671941 | 7 / 0Â Â Â Â Â |
| Inhibitor of nuclear factor kappa B kinase epsilon subunit | IKBKE | Q14164 | CHEMBL3529 | Kinase | 0.104671941 | 10 / 0Â Â Â Â Â |
| Serine/threonine-protein kinase TBK1 | TBK1 | Q9UHD2 | CHEMBL5408 | Kinase | 0.104671941 | 10 / 0Â Â Â Â Â |
| MAP kinase-activated protein kinase 2 | MAPKAPK2 | P49137 | CHEMBL2208 | Kinase | 0.104671941 | 11 / 0Â Â Â Â Â |
| Ribosomal protein S6 kinase 1 | RPS6KB1 | P23443 | CHEMBL4501 | Kinase | 0.104671941 | 33 / 0Â Â Â Â Â |
| Serine/threonine-protein kinase Aurora-A | AURKA | O14965 | CHEMBL4722 | Kinase | 0.104671941 | 81 / 0Â Â Â Â Â |
| Dipeptidyl peptidase VIII | DPP8 | Q6V1X1 | CHEMBL4657 | Protease | 0.104671941 | 36 / 12Â Â Â Â Â |
| Serotonin 1f (5-HT1f) receptor | HTR1F | P30939 | CHEMBL1805 | Family A G protein-coupled receptor | 0.104671941 | 14 / 0Â Â Â Â Â |
| Histamine H1 receptor | HRH1 | P35367 | CHEMBL231 | Family A G protein-coupled receptor | 0.104671941 | 109 / 31Â Â Â Â Â |
| Potassium channel subfamily K member 2 | KCNK2 | O95069 | CHEMBL2321615 | Voltage-gated ion channel | 0.104671941 | 2 / 0Â Â Â Â Â |
| Histone H1.0 | H1F0 | P07305 | CHEMBL3707465 | Unclassified protein | 0.104671941 | 2 / 0Â Â Â Â Â |
| Serine/threonine-protein kinase PIM3 | PIM3 | Q86V86 | CHEMBL5407 | Kinase | 0.104671941 | 107 / 0Â Â Â Â Â |
| Voltage-gated T-type calcium channel alpha-1I subunit | CACNA1I | Q9P0X4 | CHEMBL5558 | Voltage-gated ion channel | 0.104671941 | 4 / 0Â Â Â Â Â |
| Peptide N-myristoyltransferase 1 | NMT1 | P30419 | CHEMBL2593 | Enzyme | 0.104671941 | 17 / 0Â Â Â Â Â |
| Nerve growth factor receptor Trk-A | NTRK1 | P04629 | CHEMBL2815 | Kinase | 0.104671941 | 88 / 0Â Â Â Â Â |
| Histamine H4 receptor | HRH4 | Q9H3N8 | CHEMBL3759 | Family A G protein-coupled receptor | 0.104671941 | 26 / 0Â Â Â Â Â |
| Dipeptidyl peptidase IX | DPP9 | Q86TI2 | CHEMBL4793 | Protease | 0.104671941 | 20 / 0Â Â Â Â Â |
| Serotonin 2c (5-HT2c) receptor | HTR2C | P28335 | CHEMBL225 | Family A G protein-coupled receptor | 0.104671941 | 127 / 79Â Â Â Â Â |
| DNA-dependent protein kinase | PRKDC | P78527 | CHEMBL3142 | Kinase | 0.104671941 | 72 / 0Â Â Â Â Â |
| Fibroblast activation protein alpha | FAP | Q12884 | CHEMBL4683 | Protease | 0.104671941 | 2 / 0Â Â Â Â Â |
| Serotonin 1d (5-HT1d) receptor | HTR1D | P28221 | CHEMBL1983 | Family A G protein-coupled receptor | 0.104671941 | 91 / 15Â Â Â Â Â |
| Dopamine D2 receptor (by homology) | DRD2 | P14416 | CHEMBL217 | Family A G protein-coupled receptor | 0.771064571 | 3135 / 324Â Â Â Â Â |
| C-X-C chemokine receptor type 3 | CXCR3 | P49682 | CHEMBL4441 | Family A G protein-coupled receptor | 0.109013468 | 52 / 55Â Â Â Â Â |
| Somatostatin receptor 2 (by homology) | SSTR2 | P30874 | CHEMBL1804 | Family A G protein-coupled receptor | 0.100634432 | 154 / 139Â Â Â Â Â |
| Melanocortin receptor 4 | MC4R | P32245 | CHEMBL259 | Family A G protein-coupled receptor | 0.100634432 | 977 / 282Â Â Â Â Â |
| Melanocortin receptor 1 | MC1R | Q01726 | CHEMBL3795 | Family A G protein-coupled receptor | 0.100634432 | 173 / 204Â Â Â Â Â |
| Serotonin 6 (5-HT6) receptor | HTR6 | P50406 | CHEMBL3371 | Family A G protein-coupled receptor | 0.100634432 | 886 / 123Â Â Â Â Â |
| Serotonin 7 (5-HT7) receptor | HTR7 | P34969 | CHEMBL3155 | Family A G protein-coupled receptor | 0.100634432 | 618 / 38Â Â Â Â Â |
| Neurokinin 1 receptor | TACR1 | P25103 | CHEMBL249 | Family A G protein-coupled receptor | 0.100634432 | 263 / 257Â Â Â Â Â |
| Dopamine D3 receptor | DRD3 | P35462 | CHEMBL234 | Family A G protein-coupled receptor | 0.100634432 | 1331 / 98Â Â Â Â Â |
| Norepinephrine transporter | SLC6A2 | P23975 | CHEMBL222 | Electrochemical transporter | 0.100634432 | 528 / 45Â Â Â Â Â |
| Serotonin transporter | SLC6A4 | P31645 | CHEMBL228 | Electrochemical transporter | 0.100634432 | 1843 / 251Â Â Â Â Â |
| Neurokinin 2 receptor | TACR2 | P21452 | CHEMBL2327 | Family A G protein-coupled receptor | 0.100634432 | 165 / 128Â Â Â Â Â |
| Dopamine transporter | SLC6A3 | Q01959 | CHEMBL238 | Electrochemical transporter | 0.100634432 | 835 / 66Â Â Â Â Â |
| Histone deacetylase 1 | HDAC1 | Q13547 | CHEMBL325 | Eraser | 0.100634432 | 193 / 63Â Â Â Â Â |
| Serotonin 1b (5-HT1b) receptor (by homology) | HTR1B | P28222 | CHEMBL1898 | Family A G protein-coupled receptor | 0.100634432 | 564 / 280Â Â Â Â Â |
| Inhibitor of NF-kappa-B kinase (IKK) | IKBKG IKBKB CHUK | Q9Y6K9 O14920 O15111 | CHEMBL2111328 | Kinase | 0.100634432 | 9 / 0Â Â Â Â Â |
| Histone deacetylase 3 | HDAC3 | O15379 | CHEMBL1829 | Eraser | 0.100634432 | 41 / 25Â Â Â Â Â |
| Dopamine D1 receptor | DRD1 | P21728 | CHEMBL2056 | Family A G protein-coupled receptor | 0.100634432 | 245 / 35Â Â Â Â Â |
| Alpha-1a adrenergic receptor (by homology) | ADRA1A | P35348 | CHEMBL229 | Family A G protein-coupled receptor | 0.100634432 | 453 / 44Â Â Â Â Â |
| Acetylcholinesterase | ACHE | P22303 | CHEMBL220 | Hydrolase | 0.100634432 | 730 / 117Â Â Â Â Â |
| Tyrosine-protein kinase FYN | FYN | P06241 | CHEMBL1841 | Kinase | 0.100634432 | 35 / 0Â Â Â Â Â |
| Tyrosine-protein kinase YES | YES1 | P07947 | CHEMBL2073 | Kinase | 0.100634432 | 33 / 0Â Â Â Â Â |
| Histamine H2 receptor | HRH2 | P25021 | CHEMBL1941 | Family A G protein-coupled receptor | 0.100634432 | 24 / 3Â Â Â Â Â |
| Histamine H1 receptor | HRH1 | P35367 | CHEMBL231 | Family A G protein-coupled receptor | 0.100634432 | 178 / 16Â Â Â Â Â |
| Cyclin-dependent kinase 1 | CDK1 | P06493 | CHEMBL308 | Kinase | 0.100634432 | 128 / 0Â Â Â Â Â |
| MAP kinase ERK2 (by homology) | MAPK1 | P28482 | CHEMBL4040 | Kinase | 0.100634432 | 157 / 0Â Â Â Â Â |
| Serotonin 1a (5-HT1a) receptor | HTR1A | P08908 | CHEMBL214 | Family A G protein-coupled receptor | 0.100634432 | 1200 / 115Â Â Â Â Â |
| Voltage-gated N-type calcium channel alpha-1B subunit | CACNA1B | Q00975 | CHEMBL4478 | Voltage-gated ion channel | 0.100634432 | 26 / 0Â Â Â Â Â |
| Serotonin 2c (5-HT2c) receptor | HTR2C | P28335 | CHEMBL225 | Family A G protein-coupled receptor | 0.100634432 | 619 / 56Â Â Â Â Â |
| Tyrosine-protein kinase SYK | SYK | P43405 | CHEMBL2599 | Kinase | 0.100634432 | 264 / 0Â Â Â Â Â |
| Serotonin 2a (5-HT2a) receptor | HTR2A | P28223 | CHEMBL224 | Family A G protein-coupled receptor | 0.100634432 | 1316 / 118Â Â Â Â Â |
| EZH2/SUZ12/EED/RBBP7/RBBP4 | EZH2 | Q15910 | CHEMBL2189110 | Writer | 0.100634432 | 66 / 0Â Â Â Â Â |
| TGF-beta receptor type I | TGFBR1 | P36897 | CHEMBL4439 | Kinase | 0.100634432 | 77 / 0Â Â Â Â Â |
| Calmodulin | CALM1 | P62158 | CHEMBL6093 | Unclassified protein | 0.100634432 | 2 / 0Â Â Â Â Â |
| Lethal(3)malignant brain tumor-like protein 1 | L3MBTL1 | Q9Y468 | CHEMBL1287622 | Reader | 0.100634432 | 33 / 0Â Â Â Â Â |
| p53-binding protein Mdm-2 | MDM2 | Q00987 | CHEMBL5023 | Other nuclear protein | 0.100634432 | 105 / 0Â Â Â Â Â |
| Phosphodiesterase 9A | PDE9A | O76083 | CHEMBL3535 | Phosphodiesterase | 0.100634432 | 1 / 0Â Â Â Â Â |
| Baculoviral IAP repeat-containing protein 3 | BIRC3 | Q13489 | CHEMBL5335 | Enzyme | 0.100634432 | 30 / 0Â Â Â Â Â |
| Corticotropin releasing factor receptor 1 | CRHR1 | P34998 | CHEMBL1800 | Family B G protein-coupled receptor | 0.100634432 | 21 / 0Â Â Â Â Â |
| LIM domain kinase 2 | LIMK2 | P53671 | CHEMBL5932 | Kinase | 0.100634432 | 62 / 0Â Â Â Â Â |
| HERG | KCNH2 | Q12809 | CHEMBL240 | Voltage-gated ion channel | 0.100634432 | 1088 / 79Â Â Â Â Â |
| Vascular endothelial growth factor receptor 1 | FLT1 | P17948 | CHEMBL1868 | Kinase | 0.100634432 | 69 / 0Â Â Â Â Â |
| Platelet-derived growth factor receptor alpha | PDGFRA | P16234 | CHEMBL2007 | Kinase | 0.100634432 | 51 / 0Â Â Â Â Â |
| Serotonin 5a (5-HT5a) receptor | HTR5A | P47898 | CHEMBL3426 | Family A G protein-coupled receptor | 0.100634432 | 33 / 13Â Â Â Â Â |
| Mu opioid receptor | OPRM1 | P35372 | CHEMBL233 | Family A G protein-coupled receptor | 0.100634432 | 1855 / 266Â Â Â Â Â |
| MBT domain-containing protein 1 | MBTD1 | Q05BQ5 | CHEMBL1287625 | Reader | 0.100634432 | 13 / 0Â Â Â Â Â |
| Insulin receptor | INSR | P06213 | CHEMBL1981 | Kinase | 0.100634432 | 52 / 0Â Â Â Â Â |
| ALK tyrosine kinase receptor | ALK | Q9UM73 | CHEMBL4247 | Kinase | 0.100634432 | 117 / 0Â Â Â Â Â |
| Melanocortin receptor 5 | MC5R | P33032 | CHEMBL4608 | Family A G protein-coupled receptor | 0.100634432 | 154 / 120Â Â Â Â Â |
| Epidermal growth factor receptor erbB1 | EGFR | P00533 | CHEMBL203 | Kinase | 0.100634432 | 492 / 0Â Â Â Â Â |
| Phosphodiesterase 4D | PDE4D | Q08499 | CHEMBL288 | Phosphodiesterase | 0.100634432 | 14 / 0Â Â Â Â Â |
| Phosphodiesterase 7A | PDE7A | Q13946 | CHEMBL3012 | Phosphodiesterase | 0.100634432 | 22 / 0Â Â Â Â Â |
| Epoxide hydratase | EPHX2 | P34913 | CHEMBL2409 | Protease | 0.100634432 | 36 / 27Â Â Â Â Â |
| Cyclin-dependent kinase 2/cyclin A | CDK2 CCNA1 CCNA2 | P24941 P78396 P20248 | CHEMBL2094128 | Other cytosolic protein | 0.100634432 | 144 / 0Â Â Â Â Â |
| Steryl-sulfatase | STS | P08842 | CHEMBL3559 | Enzyme | 0.100634432 | 2 / 0Â Â Â Â Â |
| Histone-lysine N-methyltransferase SMYD3 | SMYD3 | Q9H7B4 | CHEMBL2321643 | Writer | 0.100634432 | 6 / 0Â Â Â Â Â |
| Membrane-bound transcription factor site-1 protease | MBTPS1 | Q14703 | CHEMBL5916 | Protease | 0.100634432 | 19 / 0Â Â Â Â Â |
| Serine/threonine-protein kinase AKT2 | AKT2 | P31751 | CHEMBL2431 | Kinase | 0.100634432 | 230 / 0Â Â Â Â Â |
| Nociceptin receptor | OPRL1 | P41146 | CHEMBL2014 | Family A G protein-coupled receptor | 0.100634432 | 301 / 31Â Â Â Â Â |
| Serine/threonine-protein kinase mTOR | MTOR | P42345 | CHEMBL2842 | Kinase | 0.100634432 | 187 / 0Â Â Â Â Â |
| Fatty acid synthase | FASN | P49327 | CHEMBL4158 | Transferase | 0.100634432 | 23 / 0Â Â Â Â Â |
| Lysosomal Pro-X carboxypeptidase | PRCP | P42785 | CHEMBL2335 | Protease | 0.100634432 | 159 / 0Â Â Â Â Â |
| Tyrosine-protein kinase JAK2 | JAK2 | O60674 | CHEMBL2971 | Kinase | 0.100634432 | 225 / 0Â Â Â Â Â |
| Dipeptidyl peptidase II | DPP7 | Q9UHL4 | CHEMBL3976 | Protease | 0.100634432 | 277 / 0Â Â Â Â Â |
| Serine/threonine-protein kinase Aurora-A | AURKA | O14965 | CHEMBL4722 | Kinase | 0.100634432 | 242 / 0Â Â Â Â Â |
| Mitogen-activated protein kinase 7 | MAPK7 | Q13164 | CHEMBL5332 | Kinase | 0.100634432 | 10 / 0Â Â Â Â Â |
| Melanocortin receptor 3 | MC3R | P41968 | CHEMBL4644 | Family A G protein-coupled receptor | 0.100634432 | 177 / 139Â Â Â Â Â |
| Receptor protein-tyrosine kinase erbB-2 | ERBB2 | P04626 | CHEMBL1824 | Kinase | 0.100634432 | 150 / 0Â Â Â Â Â |
| Protein arginine N-methyltransferase 6 | PRMT6 | Q96LA8 | CHEMBL1275221 | Writer | 0.100634432 | 12 / 0Â Â Â Â Â |
| Protein arginine N-methyltransferase 8 | PRMT8 | Q9NR22 | CHEMBL3108648 | Writer | 0.100634432 | 12 / 0Â Â Â Â Â |
| Dual specificity protein kinase TTK | TTK | P33981 | CHEMBL3983 | Kinase | 0.100634432 | 35 / 0Â Â Â Â Â |
| Serine/threonine-protein kinase PAK 1 | PAK1 | Q13153 | CHEMBL4600 | Kinase | 0.100634432 | 54 / 0Â Â Â Â Â |
| Protein-arginine N-methyltransferase 1 | PRMT1 | Q99873 | CHEMBL5524 | Writer | 0.100634432 | 12 / 0Â Â Â Â Â |
| Alpha-2a adrenergic receptor | ADRA2A | P08913 | CHEMBL1867 | Family A G protein-coupled receptor | 0.100634432 | 73 / 35Â Â Â Â Â |
| Adrenergic receptor alpha-2 | ADRA2C | P18825 | CHEMBL1916 | Family A G protein-coupled receptor | 0.100634432 | 59 / 28Â Â Â Â Â |
| Alpha-2b adrenergic receptor | ADRA2B | P18089 | CHEMBL1942 | Family A G protein-coupled receptor | 0.100634432 | 50 / 33Â Â Â Â Â |
| Alpha-1d adrenergic receptor | ADRA1D | P25100 | CHEMBL223 | Family A G protein-coupled receptor | 0.100634432 | 228 / 17Â Â Â Â Â |
| Cytochrome P450 2D6 | CYP2D6 | P10635 | CHEMBL289 | Cytochrome P450 | 0.100634432 | 6 / 5Â Â Â Â Â |
| Delta opioid receptor | OPRD1 | P41143 | CHEMBL236 | Family A G protein-coupled receptor | 0.100634432 | 1562 / 166Â Â Â Â Â |
| Tyrosine-protein kinase JAK1 | JAK1 | P23458 | CHEMBL2835 | Kinase | 0.100634432 | 166 / 0Â Â Â Â Â |
| LIM domain kinase 1 | LIMK1 | P53667 | CHEMBL3836 | Kinase | 0.100634432 | 44 / 0Â Â Â Â Â |
| Baculoviral IAP repeat-containing protein 8 | BIRC8 | Q96P09 | CHEMBL5851 | Unclassified protein | 0.100634432 | 6 / 0Â Â Â Â Â |
| MAP kinase ERK1 (by homology) | MAPK3 | P27361 | CHEMBL3385 | Kinase | 0.100634432 | 51 / 0Â Â Â Â Â |
| Melanin-concentrating hormone receptor 1 | MCHR1 | Q99705 | CHEMBL344 | Family A G protein-coupled receptor | 0.100634432 | 927 / 37Â Â Â Â Â |
| C-C chemokine receptor type 4 | CCR4 | P51679 | CHEMBL2414 | Family A G protein-coupled receptor | 0.100634432 | 75 / 0Â Â Â Â Â |
| Tumor suppressor p53-binding protein 1 | TP53BP1 | Q12888 | CHEMBL2424509 | Reader | 0.100634432 | 3 / 0Â Â Â Â Â |
| Serine/threonine-protein kinase B-raf | BRAF | P15056 | CHEMBL5145 | Kinase | 0.100634432 | 115 / 0Â Â Â Â Â |
| Protein Mdm4 | MDM4 | O15151 | CHEMBL1255126 | Unclassified protein | 0.100634432 | 18 / 0Â Â Â Â Â |
| Phosphodiesterase 4B (by homology) | PDE4B | Q07343 | CHEMBL275 | Phosphodiesterase | 0.100634432 | 52 / 0Â Â Â Â Â |
| Prostanoid EP1 receptor | PTGER1 | P34995 | CHEMBL1811 | Family A G protein-coupled receptor | 0.100634432 | 23 / 0Â Â Â Â Â |
| Carbonic anhydrase II | CA2 | P00918 | CHEMBL205 | Lyase | 0.100634432 | 89 / 0Â Â Â Â Â |
| Carbonic anhydrase I | CA1 | P00915 | CHEMBL261 | Lyase | 0.100634432 | 63 / 0Â Â Â Â Â |
| Ileal bile acid transporter | SLC10A2 | Q12908 | CHEMBL2778 | Electrochemical transporter | 0.100634432 | 8 / 0Â Â Â Â Â |
| Prolyl endopeptidase | PREP | P48147 | CHEMBL3202 | Protease | 0.100634432 | 11 / 0Â Â Â Â Â |
| Carbonic anhydrase IX | CA9 | Q16790 | CHEMBL3594 | Lyase | 0.100634432 | 48 / 0Â Â Â Â Â |
| Serine/threonine-protein kinase Chk1 | CHEK1 | O14757 | CHEMBL4630 | Kinase | 0.100634432 | 453 / 0Â Â Â Â Â |
| Nitric-oxide synthase, endothelial | NOS3 | P29474 | CHEMBL4803 | Enzyme | 0.100634432 | 69 / 0Â Â Â Â Â |
| Voltage-gated T-type calcium channel alpha-1H subunit | CACNA1H | O95180 | CHEMBL1859 | Voltage-gated ion channel | 0.100634432 | 19 / 0Â Â Â Â Â |
| Monoamine oxidase B | MAOB | P27338 | CHEMBL2039 | Oxidoreductase | 0.100634432 | 78 / 0Â Â Â Â Â |
| Dopamine transporter (by homology) | SLC6A3 | Q01959 | CHEMBL238 | Electrochemical transporter | 0.460288742 | 882 / 360Â Â Â Â Â |
| Muscarinic acetylcholine receptor M2 | CHRM2 | P08172 | CHEMBL211 | Family A G protein-coupled receptor | 0.443883112 | 299 / 119Â Â Â Â Â |
| Muscarinic acetylcholine receptor M4 | CHRM4 | P08173 | CHEMBL1821 | Family A G protein-coupled receptor | 0.427205275 | 58 / 31Â Â Â Â Â |
| Muscarinic acetylcholine receptor M1 | CHRM1 | P11229 | CHEMBL216 | Family A G protein-coupled receptor | 0.427205275 | 306 / 105Â Â Â Â Â |
| Muscarinic acetylcholine receptor M3 | CHRM3 | P20309 | CHEMBL245 | Family A G protein-coupled receptor | 0.427205275 | 258 / 125Â Â Â Â Â |
| Sigma opioid receptor | SIGMAR1 | Q99720 | CHEMBL287 | Membrane receptor | 0.320218721 | 381 / 46Â Â Â Â Â |
| Muscarinic acetylcholine receptor M5 | CHRM5 | P08912 | CHEMBL2035 | Family A G protein-coupled receptor | 0.180252494 | 58 / 24Â Â Â Â Â |
| Cytochrome P450 2D6 | CYP2D6 | P10635 | CHEMBL289 | Cytochrome P450 | 0.171978589 | 17 / 2Â Â Â Â Â |
| Lysosomal Pro-X carboxypeptidase | PRCP | P42785 | CHEMBL2335 | Protease | 0.130791955 | 38 / 2Â Â Â Â Â |
| Serotonin 2b (5-HT2b) receptor | HTR2B | P41595 | CHEMBL1833 | Family A G protein-coupled receptor | 0.865790531 | 134 / 18Â Â Â Â Â |
| Alpha-2a adrenergic receptor | ADRA2A | P08913 | CHEMBL1867 | Family A G protein-coupled receptor | 0.865790531 | 112 / 12Â Â Â Â Â |
| Serotonin 1b (5-HT1b) receptor (by homology) | HTR1B | P28222 | CHEMBL1898 | Family A G protein-coupled receptor | 0.865790531 | 197 / 12Â Â Â Â Â |
| Adrenergic receptor alpha-2 | ADRA2C | P18825 | CHEMBL1916 | Family A G protein-coupled receptor | 0.865790531 | 102 / 9Â Â Â Â Â |
| Alpha-2b adrenergic receptor | ADRA2B | P18089 | CHEMBL1942 | Family A G protein-coupled receptor | 0.865790531 | 93 / 11Â Â Â Â Â |
| Dopamine D1 receptor | DRD1 | P21728 | CHEMBL2056 | Family A G protein-coupled receptor | 0.865790531 | 78 / 22Â Â Â Â Â |
| Dopamine D2 receptor | DRD2 | P14416 | CHEMBL217 | Family A G protein-coupled receptor | 0.865790531 | 1449 / 26Â Â Â Â Â |
| Alpha-1d adrenergic receptor | ADRA1D | P25100 | CHEMBL223 | Family A G protein-coupled receptor | 0.865790531 | 302 / 8Â Â Â Â Â |
| Serotonin 2a (5-HT2a) receptor | HTR2A | P28223 | CHEMBL224 | Family A G protein-coupled receptor | 0.865790531 | 709 / 28Â Â Â Â Â |
| Serotonin 2c (5-HT2c) receptor | HTR2C | P28335 | CHEMBL225 | Family A G protein-coupled receptor | 0.865790531 | 332 / 15Â Â Â Â Â |
| Alpha-1a adrenergic receptor (by homology) | ADRA1A | P35348 | CHEMBL229 | Family A G protein-coupled receptor | 0.865790531 | 479 / 8Â Â Â Â Â |
| Mu opioid receptor | OPRM1 | P35372 | CHEMBL233 | Family A G protein-coupled receptor | 0.865790531 | 1472 / 24Â Â Â Â Â |
| Dopamine D3 receptor | DRD3 | P35462 | CHEMBL234 | Family A G protein-coupled receptor | 0.865790531 | 529 / 17Â Â Â Â Â |
| Beta-3 adrenergic receptor | ADRB3 | P13945 | CHEMBL246 | Family A G protein-coupled receptor | 0.865790531 | 96 / 2Â Â Â Â Â |
| Serotonin 6 (5-HT6) receptor | HTR6 | P50406 | CHEMBL3371 | Family A G protein-coupled receptor | 0.865790531 | 257 / 21Â Â Â Â Â |
| Cytochrome P450 2C9 | CYP2C9 | P11712 | CHEMBL3397 | Cytochrome P450 | 0.865790531 | 7 / 2Â Â Â Â Â |
| Cytochrome P450 3A4 | CYP3A4 | P08684 | CHEMBL340 | Cytochrome P450 | 0.865790531 | 20 / 6Â Â Â Â Â |
| Thromboxane-A synthase | TBXAS1 | P24557 | CHEMBL1835 | Cytochrome P450 | 0.759710317 | 7 / 2Â Â Â Â Â |
| Tyrosine-protein kinase FYN | FYN | P06241 | CHEMBL1841 | Kinase | 0.666326507 | 27 / 1Â Â Â Â Â |
| Serotonin 1d (5-HT1d) receptor | HTR1D | P28221 | CHEMBL1983 | Family A G protein-coupled receptor | 0.666326507 | 159 / 5Â Â Â Â Â |
| Adrenergic receptor beta | ADRB2 | P07550 | CHEMBL210 | Family A G protein-coupled receptor | 0.666326507 | 125 / 5Â Â Â Â Â |
| Beta-1 adrenergic receptor | ADRB1 | P08588 | CHEMBL213 | Family A G protein-coupled receptor | 0.666326507 | 121 / 7Â Â Â Â Â |
| Tyrosine-protein kinase LCK | LCK | P06239 | CHEMBL258 | Kinase | 0.666326507 | 94 / 1Â Â Â Â Â |
| Serotonin 5a (5-HT5a) receptor | HTR5A | P47898 | CHEMBL3426 | Family A G protein-coupled receptor | 0.666326507 | 11 / 8Â Â Â Â Â |
| Serotonin 1a (5-HT1a) receptor | HTR1A | P08908 | CHEMBL214 | Family A G protein-coupled receptor | 0.583471019 | 692 / 11Â Â Â Â Â |
| Serotonin 7 (5-HT7) receptor | HTR7 | P34969 | CHEMBL3155 | Family A G protein-coupled receptor | 0.2432091 | 271 / 11Â Â Â Â Â |
| Androgen Receptor | AR | P10275 | CHEMBL1871 | Nuclear receptor | 0.142092181 | 29 / 1Â Â Â Â Â |
| ATP-sensitive inward rectifier potassium channel 1 | KCNJ1 | P48048 | CHEMBL1293292 | Voltage-gated ion channel | 0.111501865 | 42 / 0Â Â Â Â Â |
| Cyclin-dependent kinase 2/cyclin E | CCNE2 CDK2 CCNE1 | O96020 P24941 P24864 | CHEMBL2094126 | Other cytosolic protein | 0.111501865 | 43 / 0Â Â Â Â Â |
| Endoplasmic reticulum mannosyl-oligosaccharide 1,2-alpha-mannosidase | MAN1B1 | Q9UKM7 | CHEMBL2308 | Enzyme | 0.111501865 | 9 / 0Â Â Â Â Â |
| Alpha-mannosidase 2A1 | MAN2A1 | Q16706 | CHEMBL4056 | Enzyme | 0.111501865 | 4 / 0Â Â Â Â Â |
| DNA topoisomerase II alpha | TOP2A | P11388 | CHEMBL1806 | Isomerase | 0.111501865 | 3 / 0Â Â Â Â Â |
| Serotonin 4 (5-HT4) receptor | HTR4 | Q13639 | CHEMBL1875 | Family A G protein-coupled receptor | 0.111501865 | 36 / 0Â Â Â Â Â |
| Mu opioid receptor | OPRM1 | P35372 | CHEMBL233 | Family A G protein-coupled receptor | 0.111501865 | 400 / 0Â Â Â Â Â |
| Delta opioid receptor | OPRD1 | P41143 | CHEMBL236 | Family A G protein-coupled receptor | 0.111501865 | 353 / 0Â Â Â Â Â |
| Kappa Opioid receptor | OPRK1 | P41145 | CHEMBL237 | Family A G protein-coupled receptor | 0.111501865 | 287 / 0Â Â Â Â Â |
| Dipeptidyl peptidase IV | DPP4 | P27487 | CHEMBL284 | Protease | 0.111501865 | 198 / 0Â Â Â Â Â |
| Purine nucleoside phosphorylase | PNP | P00491 | CHEMBL4338 | Enzyme | 0.111501865 | 69 / 0Â Â Â Â Â |
| Phosphodiesterase 5A | PDE5A | O76074 | CHEMBL1827 | Phosphodiesterase | 0.111501865 | 21 / 0Â Â Â Â Â |
| Phosphodiesterase 11A | PDE11A | Q9HCR9 | CHEMBL2717 | Phosphodiesterase | 0.111501865 | 6 / 0Â Â Â Â Â |
| Phosphodiesterase 10A | PDE10A | Q9Y233 | CHEMBL4409 | Phosphodiesterase | 0.111501865 | 65 / 0Â Â Â Â Â |
| Methionine aminopeptidase 2 | METAP2 | P50579 | CHEMBL3922 | Protease | 0.111501865 | 98 / 0Â Â Â Â Â |
| Epidermal growth factor receptor erbB1 | EGFR | P00533 | CHEMBL203 | Kinase | 0.111501865 | 157 / 0Â Â Â Â Â |
| Serotonin 1b (5-HT1b) receptor (by homology) | HTR1B | P28222 | CHEMBL1898 | Family A G protein-coupled receptor | 0.111501865 | 43 / 0Â Â Â Â Â |
| Beta-1 adrenergic receptor | ADRB1 | P08588 | CHEMBL213 | Family A G protein-coupled receptor | 0.111501865 | 174 / 0Â Â Â Â Â |
| Histone-lysine N-methyltransferase, H3 lysine-9 specific 5 | EHMT1 | Q9H9B1 | CHEMBL6031 | Writer | 0.111501865 | 1 / 0Â Â Â Â Â |
| Histone-lysine N-methyltransferase, H3 lysine-9 specific 3 | EHMT2 | Q96KQ7 | CHEMBL6032 | Writer | 0.111501865 | 5 / 0Â Â Â Â Â |
| Adrenergic receptor beta | ADRB2 | P07550 | CHEMBL210 | Family A G protein-coupled receptor | 0.111501865 | 192 / 0Â Â Â Â Â |
| Serine/threonine-protein kinase Chk1 | CHEK1 | O14757 | CHEMBL4630 | Kinase | 0.111501865 | 79 / 0Â Â Â Â Â |
| Alpha-L-fucosidase I | FUCA1 | P04066 | CHEMBL4176 | Enzyme | 0.111501865 | 40 / 0Â Â Â Â Â |
| Protein kinase C theta | PRKCQ | Q04759 | CHEMBL3920 | Kinase | 0.111501865 | 23 / 0Â Â Â Â Â |
| Serotonin 6 (5-HT6) receptor | HTR6 | P50406 | CHEMBL3371 | Family A G protein-coupled receptor | 0.111501865 | 193 / 0Â Â Â Â Â |
| Carbonic anhydrase II | CA2 | P00918 | CHEMBL205 | Lyase | 0.111501865 | 94 / 0Â Â Â Â Â |
| c-Jun N-terminal kinase 2 | MAPK9 | P45984 | CHEMBL4179 | Kinase | 0.111501865 | 17 / 0Â Â Â Â Â |
| Transient receptor potential cation channel subfamily V member 3 | TRPV3 | Q8NET8 | CHEMBL5522 | Voltage-gated ion channel | 0.111501865 | 84 / 0Â Â Â Â Â |
| Beta-3 adrenergic receptor | ADRB3 | P13945 | CHEMBL246 | Family A G protein-coupled receptor | 0.111501865 | 166 / 0Â Â Â Â Â |
| Dipeptidyl peptidase II | DPP7 | Q9UHL4 | CHEMBL3976 | Protease | 0.111501865 | 23 / 0Â Â Â Â Â |
| Dipeptidyl peptidase VIII | DPP8 | Q6V1X1 | CHEMBL4657 | Protease | 0.111501865 | 28 / 0Â Â Â Â Â |
| S-methyl-5-thioadenosine phosphorylase | MTAP | Q13126 | CHEMBL4941 | Enzyme | 0.111501865 | 59 / 0Â Â Â Â Â |
| Serine/threonine-protein kinase Chk2 | CHEK2 | O96017 | CHEMBL2527 | Kinase | 0.111501865 | 10 / 0Â Â Â Â Â |
| C-C chemokine receptor type 1 | CCR1 | P32246 | CHEMBL2413 | Family A G protein-coupled receptor | 0.111501865 | 88 / 0Â Â Â Â Â |
| Serotonin 1a (5-HT1a) receptor | HTR1A | P08908 | CHEMBL214 | Family A G protein-coupled receptor | 0.111501865 | 183 / 0Â Â Â Â Â |
| Histamine H1 receptor | HRH1 | P35367 | CHEMBL231 | Family A G protein-coupled receptor | 0.111501865 | 74 / 0Â Â Â Â Â |
| Serotonin 7 (5-HT7) receptor | HTR7 | P34969 | CHEMBL3155 | Family A G protein-coupled receptor | 0.111501865 | 40 / 0Â Â Â Â Â |
| P-glycoprotein 1 | ABCB1 | P08183 | CHEMBL4302 | Primary active transporter | 0.111501865 | 99 / 0Â Â Â Â Â |
| P2X purinoceptor 7 | P2RX7 | Q99572 | CHEMBL4805 | Ligand-gated ion channel | 0.111501865 | 10 / 0Â Â Â Â Â |
| Nociceptin receptor | OPRL1 | P41146 | CHEMBL2014 | Family A G protein-coupled receptor | 0.111501865 | 64 / 0Â Â Â Â Â |
| Dopamine D1 receptor | DRD1 | P21728 | CHEMBL2056 | Family A G protein-coupled receptor | 0.111501865 | 30 / 0Â Â Â Â Â |
| Dopamine D2 receptor | DRD2 | P14416 | CHEMBL217 | Family A G protein-coupled receptor | 0.111501865 | 260 / 0Â Â Â Â Â |
| Dopamine D4 receptor | DRD4 | P21917 | CHEMBL219 | Family A G protein-coupled receptor | 0.111501865 | 79 / 0Â Â Â Â Â |
| Adenosine A1 receptor | ADORA1 | P30542 | CHEMBL226 | Family A G protein-coupled receptor | 0.111501865 | 501 / 0Â Â Â Â Â |
| Dopamine D3 receptor | DRD3 | P35462 | CHEMBL234 | Family A G protein-coupled receptor | 0.111501865 | 135 / 0Â Â Â Â Â |
| Adenosine A3 receptor | ADORA3 | P0DMS8 | CHEMBL256 | Family A G protein-coupled receptor | 0.111501865 | 268 / 0Â Â Â Â Â |
| Lysosomal alpha-mannosidase | MAN2B1 | O00754 | CHEMBL4059 | Enzyme | 0.111501865 | 2 / 0Â Â Â Â Â |
| Serine/threonine-protein kinase Aurora-B | AURKB | Q96GD4 | CHEMBL2185 | Kinase | 0.111501865 | 28 / 0Â Â Â Â Â |
| Tyrosyl-tRNA synthetase | YARS | P54577 | CHEMBL3179 | Enzyme | 0.111501865 | 5 / 0Â Â Â Â Â |
| Ribosomal protein S6 kinase 1 | RPS6KB1 | P23443 | CHEMBL4501 | Kinase | 0.111501865 | 16 / 0Â Â Â Â Â |
| Serine/threonine-protein kinase Aurora-A | AURKA | O14965 | CHEMBL4722 | Kinase | 0.111501865 | 40 / 0Â Â Â Â Â |
| Nerve growth factor receptor Trk-A | NTRK1 | P04629 | CHEMBL2815 | Kinase | 0.111501865 | 78 / 0Â Â Â Â Â |
| Histamine H4 receptor | HRH4 | Q9H3N8 | CHEMBL3759 | Family A G protein-coupled receptor | 0.111501865 | 30 / 0Â Â Â Â Â |
| Thrombin | F2 | P00734 | CHEMBL204 | Protease | 0.111501865 | 34 / 0Â Â Â Â Â |
| Thrombin and coagulation factor X | F10 | P00742 | CHEMBL244 | Protease | 0.111501865 | 32 / 0Â Â Â Â Â |
| Poly [ADP-ribose] polymerase-1 | PARP1 | P09874 | CHEMBL3105 | Enzyme | 0.111501865 | 46 / 0Â Â Â Â Â |
| PI3-kinase p110-alpha subunit | PIK3CA | P42336 | CHEMBL4005 | Enzyme | 0.111501865 | 184 / 0Â Â Â Â Â |
| Tyrosine-protein kinase receptor FLT3 | FLT3 | P36888 | CHEMBL1974 | Kinase | 0.111501865 | 27 / 0Â Â Â Â Â |
| Tyrosine-protein kinase SRC | SRC | P12931 | CHEMBL267 | Kinase | 0.111501865 | 88 / 0Â Â Â Â Â |
| Vesicular acetylcholine transporter | SLC18A3 | Q16572 | CHEMBL4767 | Electrochemical transporter | 0.111501865 | 103 / 0Â Â Â Â Â |
| Serine/threonine-protein kinase PIM3 | PIM3 | Q86V86 | CHEMBL5407 | Kinase | 0.111501865 | 62 / 0Â Â Â Â Â |
| Histamine H3 receptor | HRH3 | Q9Y5N1 | CHEMBL264 | Family A G protein-coupled receptor | 0.111501865 | 120 / 0Â Â Â Â Â |
| Sphingosine kinase 2 | SPHK2 | Q9NRA0 | CHEMBL3023 | Enzyme | 0.111501865 | 20 / 0Â Â Â Â Â |
| Sphingosine kinase 1 | SPHK1 | Q9NYA1 | CHEMBL4394 | Enzyme | 0.111501865 | 25 / 0Â Â Â Â Â |
| Beta-secretase 1 | BACE1 | P56817 | CHEMBL4822 | Protease | 0.111501865 | 154 / 0Â Â Â Â Â |
| PI3-kinase p110-delta subunit | PIK3CD | O00329 | CHEMBL3130 | Enzyme | 0.111501865 | 36 / 0Â Â Â Â Â |
| c-Jun N-terminal kinase 1 | MAPK8 | P45983 | CHEMBL2276 | Kinase | 0.111501865 | 17 / 0Â Â Â Â Â |
| Cyclin-dependent kinase 2/cyclin A | CDK2 CCNA1 CCNA2 | P24941 P78396 P20248 | CHEMBL2094128 | Other cytosolic protein | 0.111501865 | 28 / 0Â Â Â Â Â |
| Serine/threonine-protein kinase PIM1 | PIM1 | P11309 | CHEMBL2147 | Kinase | 0.111501865 | 96 / 0Â Â Â Â Â |
| Protein kinase C iota | PRKCI | P41743 | CHEMBL2598 | Kinase | 0.111501865 | 8 / 0Â Â Â Â Â |
| MAP kinase p38 alpha | MAPK14 | Q16539 | CHEMBL260 | Kinase | 0.111501865 | 72 / 0Â Â Â Â Â |
| MAP kinase p38 beta | MAPK11 | Q15759 | CHEMBL3961 | Kinase | 0.111501865 | 15 / 0Â Â Â Â Â |
| Heat shock protein HSP 90-beta | HSP90AB1 | P08238 | CHEMBL4303 | Other cytosolic protein | 0.111501865 | 28 / 0Â Â Â Â Â |
| Neuronal acetylcholine receptor protein alpha-4 subunit | CHRNA4 | P43681 | CHEMBL1882 | Ligand-gated ion channel | 0.111501865 | 17 / 0Â Â Â Â Â |
| Indoleamine 2,3-dioxygenase | IDO1 | P14902 | CHEMBL4685 | Enzyme | 0.111501865 | 6 / 0Â Â Â Â Â |
| ATPase family AAA domain-containing protein 2 | ATAD2 | Q6PL18 | CHEMBL2150837 | Reader | 0.111501865 | 9 / 0Â Â Â Â Â |
| Cyclin-dependent kinase 1 | CDK1 | P06493 | CHEMBL308 | Kinase | 0.111501865 | 54 / 0Â Â Â Â Â |
| MAP kinase signal-integrating kinase 2 | MKNK2 | Q9HBH9 | CHEMBL4204 | Kinase | 0.111501865 | 20 / 0Â Â Â Â Â |
| p53-binding protein Mdm-2 | MDM2 | Q00987 | CHEMBL5023 | Other nuclear protein | 0.111501865 | 45 / 0Â Â Â Â Â |
| Synaptic vesicular amine transporter (by homology) | SLC18A2 | Q05940 | CHEMBL1893 | Electrochemical transporter | 0.111501865 | 47 / 0Â Â Â Â Â |
| C-C chemokine receptor type 3 | CCR3 | P51677 | CHEMBL3473 | Family A G protein-coupled receptor | 0.111501865 | 62 / 0Â Â Â Â Â |
| Inhibitor of apoptosis protein 3 | XIAP | P98170 | CHEMBL4198 | Other cytosolic protein | 0.111501865 | 59 / 0Â Â Â Â Â |
| Voltage-gated potassium channel subunit Kv1.5 | KCNA5 | P22460 | CHEMBL4306 | Voltage-gated ion channel | 0.111501865 | 12 / 0Â Â Â Â Â |
| Baculoviral IAP repeat-containing protein 2 | BIRC2 | Q13490 | CHEMBL5462 | Enzyme | 0.111501865 | 33 / 0Â Â Â Â Â |
| Serotonin 1f (5-HT1f) receptor | HTR1F | P30939 | CHEMBL1805 | Family A G protein-coupled receptor | 0.111501865 | 13 / 0Â Â Â Â Â |
| Sodium channel protein type IX alpha subunit | SCN9A | Q15858 | CHEMBL4296 | Voltage-gated ion channel | 0.111501865 | 116 / 0Â Â Â Â Â |
| Arachidonate 12-lipoxygenase | ALOX12 | P18054 | CHEMBL3687 | Enzyme | 0.111501865 | 2 / 0Â Â Â Â Â |
| Carbonic anhydrase IV | CA4 | P22748 | CHEMBL3729 | Lyase | 0.111501865 | 4 / 0Â Â Â Â Â |
| Bromodomain-containing protein 4 | BRD4 | O60885 | CHEMBL1163125 | Reader | 0.111501865 | 14 / 0Â Â Â Â Â |
| Tyrosine-protein kinase SYK | SYK | P43405 | CHEMBL2599 | Kinase | 0.111501865 | 81 / 0Â Â Â Â Â |
| Leucine-rich repeat serine/threonine-protein kinase 2 | LRRK2 | Q5S007 | CHEMBL1075104 | Kinase | 0.111501865 | 26 / 0Â Â Â Â Â |
| Cathepsin D | CTSD | P07339 | CHEMBL2581 | Protease | 0.111501865 | 37 / 0Â Â Â Â Â |
| Serine/threonine-protein kinase receptor R3 | ACVRL1 | P37023 | CHEMBL5311 | Kinase | 0.111501865 | 23 / 0Â Â Â Â Â |
| Calcium sensing receptor | CASR | P41180 | CHEMBL1878 | Family C G protein-coupled receptor | 0.111501865 | 16 / 0Â Â Â Â Â |
| Alpha-1d adrenergic receptor | ADRA1D | P25100 | CHEMBL223 | Family A G protein-coupled receptor | 0.111501865 | 69 / 0Â Â Â Â Â |
| Alpha-1b adrenergic receptor | ADRA1B | P35368 | CHEMBL232 | Family A G protein-coupled receptor | 0.111501865 | 65 / 0Â Â Â Â Â |
| Tyrosine-protein kinase LCK | LCK | P06239 | CHEMBL258 | Kinase | 0.111501865 | 17 / 0Â Â Â Â Â |
| Mannose-6-phosphate isomerase | MPI | P34949 | CHEMBL2758 | Isomerase | 0.111501865 | 2 / 0Â Â Â Â Â |
| Casein kinase I delta | CSNK1D | P48730 | CHEMBL2828 | Kinase | 0.111501865 | 2 / 0Â Â Â Â Â |
| Matrix metalloproteinase 1 | MMP1 | P03956 | CHEMBL332 | Protease | 0.111501865 | 81 / 0Â Â Â Â Â |
| Dipeptidyl peptidase IV | DPP4 | P27487 | CHEMBL284 | Protease | 0.113285953 | 152 / 0Â Â Â Â Â |
| Neuronal acetylcholine receptor protein alpha-7 subunit | CHRNA7 | P36544 | CHEMBL2492 | Ligand-gated ion channel | 0.113285953 | 13 / 0Â Â Â Â Â |
| Vesicular acetylcholine transporter | SLC18A3 | Q16572 | CHEMBL4767 | Electrochemical transporter | 0.113285953 | 165 / 0Â Â Â Â Â |
| Histamine H3 receptor | HRH3 | Q9Y5N1 | CHEMBL264 | Family A G protein-coupled receptor | 0.113285953 | 205 / 0Â Â Â Â Â |
| Anti-estrogen binding site (AEBS) | EBP | Q15125 | CHEMBL4931 | Enzyme | 0.113285953 | 4 / 2Â Â Â Â Â |
| Serotonin 3a (5-HT3a) receptor | HTR3A | P46098 | CHEMBL1899 | Ligand-gated ion channel | 0.113285953 | 37 / 0Â Â Â Â Â |
| Serotonin transporter (by homology) | SLC6A4 | P31645 | CHEMBL228 | Electrochemical transporter | 0.113285953 | 599 / 0Â Â Â Â Â |
| Protein arginine N-methyltransferase 6 | PRMT6 | Q96LA8 | CHEMBL1275221 | Writer | 0.113285953 | 3 / 0Â Â Â Â Â |
| Rho-associated protein kinase 2 | ROCK2 | O75116 | CHEMBL2973 | Kinase | 0.113285953 | 59 / 0Â Â Â Â Â |
| Protein arginine N-methyltransferase 8 | PRMT8 | Q9NR22 | CHEMBL3108648 | Writer | 0.113285953 | 3 / 0Â Â Â Â Â |
| Protein-arginine N-methyltransferase 1 | PRMT1 | Q99873 | CHEMBL5524 | Writer | 0.113285953 | 3 / 0Â Â Â Â Â |
| Sonic hedgehog protein | SHH | Q15465 | CHEMBL5602 | Unclassified protein | 0.113285953 | 0 / 5Â Â Â Â Â |
| Alpha-2a adrenergic receptor | ADRA2A | P08913 | CHEMBL1867 | Family A G protein-coupled receptor | 0.113285953 | 45 / 0Â Â Â Â Â |
| Adrenergic receptor alpha-2 | ADRA2C | P18825 | CHEMBL1916 | Family A G protein-coupled receptor | 0.113285953 | 39 / 0Â Â Â Â Â |
| Alpha-2b adrenergic receptor | ADRA2B | P18089 | CHEMBL1942 | Family A G protein-coupled receptor | 0.113285953 | 34 / 0Â Â Â Â Â |
| Alpha-1d adrenergic receptor | ADRA1D | P25100 | CHEMBL223 | Family A G protein-coupled receptor | 0.113285953 | 67 / 0Â Â Â Â Â |
| Potassium channel subfamily K member 3 | KCNK3 | O14649 | CHEMBL2321613 | Voltage-gated ion channel | 0.113285953 | 2 / 0Â Â Â Â Â |
| Alpha-1b adrenergic receptor | ADRA1B | P35368 | CHEMBL232 | Family A G protein-coupled receptor | 0.113285953 | 65 / 0Â Â Â Â Â |
| Dopamine D3 receptor | DRD3 | P35462 | CHEMBL234 | Family A G protein-coupled receptor | 0.113285953 | 289 / 0Â Â Â Â Â |
| Neurokinin 1 receptor | TACR1 | P25103 | CHEMBL249 | Family A G protein-coupled receptor | 0.113285953 | 53 / 0Â Â Â Â Â |
| C-X-C chemokine receptor type 7 | ACKR3 | P25106 | CHEMBL2010631 | Family A G protein-coupled receptor | 0.113285953 | 3 / 0Â Â Â Â Â |
| Synaptic vesicular amine transporter (by homology) | SLC18A2 | Q05940 | CHEMBL1893 | Electrochemical transporter | 0.113285953 | 54 / 0Â Â Â Â Â |
| Poly [ADP-ribose] polymerase-1 | PARP1 | P09874 | CHEMBL3105 | Enzyme | 0.113285953 | 52 / 0Â Â Â Â Â |
| Serotonin 2b (5-HT2b) receptor | HTR2B | P41595 | CHEMBL1833 | Family A G protein-coupled receptor | 0.113285953 | 43 / 0Â Â Â Â Â |
| Adenosine A3 receptor | ADORA3 | P0DMS8 | CHEMBL256 | Family A G protein-coupled receptor | 0.113285953 | 62 / 0Â Â Â Â Â |
| Cytochrome P450 2D6 | CYP2D6 | P10635 | CHEMBL289 | Cytochrome P450 | 0.113285953 | 7 / 0Â Â Â Â Â |
| Serotonin 6 (5-HT6) receptor | HTR6 | P50406 | CHEMBL3371 | Family A G protein-coupled receptor | 0.113285953 | 188 / 0Â Â Â Â Â |
| Nociceptin receptor | OPRL1 | P41146 | CHEMBL2014 | Family A G protein-coupled receptor | 0.113285953 | 165 / 0Â Â Â Â Â |
| Phosphodiesterase 10A | PDE10A | Q9Y233 | CHEMBL4409 | Phosphodiesterase | 0.113285953 | 97 / 0Â Â Â Â Â |
| Serotonin 1d (5-HT1d) receptor | HTR1D | P28221 | CHEMBL1983 | Family A G protein-coupled receptor | 0.113285953 | 77 / 0Â Â Â Â Â |
| C-C chemokine receptor type 2 | CCR2 | P41597 | CHEMBL4015 | Family A G protein-coupled receptor | 0.113285953 | 44 / 0Â Â Â Â Â |
| Dipeptidyl peptidase VIII | DPP8 | Q6V1X1 | CHEMBL4657 | Protease | 0.113285953 | 30 / 0Â Â Â Â Â |
| Dipeptidyl peptidase IX | DPP9 | Q86TI2 | CHEMBL4793 | Protease | 0.113285953 | 19 / 0Â Â Â Â Â |
| p53-binding protein Mdm-2 | MDM2 | Q00987 | CHEMBL5023 | Other nuclear protein | 0.113285953 | 110 / 0Â Â Â Â Â |
| Histamine H1 receptor | HRH1 | P35367 | CHEMBL231 | Family A G protein-coupled receptor | 0.113285953 | 98 / 0Â Â Â Â Â |
| C-C chemokine receptor type 3 | CCR3 | P51677 | CHEMBL3473 | Family A G protein-coupled receptor | 0.113285953 | 114 / 0Â Â Â Â Â |
| Serotonin 1b (5-HT1b) receptor (by homology) | HTR1B | P28222 | CHEMBL1898 | Family A G protein-coupled receptor | 0.113285953 | 78 / 0Â Â Â Â Â |
| Dopamine D1 receptor | DRD1 | P21728 | CHEMBL2056 | Family A G protein-coupled receptor | 0.113285953 | 48 / 0Â Â Â Â Â |
| Serotonin 2c (5-HT2c) receptor | HTR2C | P28335 | CHEMBL225 | Family A G protein-coupled receptor | 0.113285953 | 93 / 0Â Â Â Â Â |
| Dopamine D5 receptor | DRD5 | P21918 | CHEMBL1850 | Family A G protein-coupled receptor | 0.113285953 | 10 / 0Â Â Â Â Â |
| Histamine H2 receptor | HRH2 | P25021 | CHEMBL1941 | Family A G protein-coupled receptor | 0.113285953 | 8 / 0Â Â Â Â Â |
| Dopamine D4 receptor | DRD4 | P21917 | CHEMBL219 | Family A G protein-coupled receptor | 0.113285953 | 120 / 0Â Â Â Â Â |
| Potassium channel subfamily K member 2 | KCNK2 | O95069 | CHEMBL2321615 | Voltage-gated ion channel | 0.113285953 | 2 / 0Â Â Â Â Â |
| Serotonin 7 (5-HT7) receptor | HTR7 | P34969 | CHEMBL3155 | Family A G protein-coupled receptor | 0.113285953 | 54 / 0Â Â Â Â Â |
| Phosphodiesterase 9A | PDE9A | O76083 | CHEMBL3535 | Phosphodiesterase | 0.113285953 | 13 / 0Â Â Â Â Â |
| Histone H1.0 | H1F0 | P07305 | CHEMBL3707465 | Unclassified protein | 0.113285953 | 1 / 0Â Â Â Â Â |
| Phosphodiesterase 1C | PDE1C | Q14123 | CHEMBL4619 | Phosphodiesterase | 0.113285953 | 11 / 0Â Â Â Â Â |
| Tyrosine-protein kinase JAK1 | JAK1 | P23458 | CHEMBL2835 | Kinase | 0.113285953 | 70 / 0Â Â Â Â Â |
| Histamine H4 receptor | HRH4 | Q9H3N8 | CHEMBL3759 | Family A G protein-coupled receptor | 0.113285953 | 22 / 0Â Â Â Â Â |
| ATP-sensitive inward rectifier potassium channel 1 | KCNJ1 | P48048 | CHEMBL1293292 | Voltage-gated ion channel | 0.113285953 | 52 / 0Â Â Â Â Â |
| Insulin-like growth factor I receptor | IGF1R | P08069 | CHEMBL1957 | Kinase | 0.113285953 | 45 / 0Â Â Â Â Â |
| Serine/threonine-protein kinase AKT2 | AKT2 | P31751 | CHEMBL2431 | Kinase | 0.113285953 | 18 / 0Â Â Â Â Â |
| Serine/threonine-protein kinase AKT | AKT1 | P31749 | CHEMBL4282 | Kinase | 0.113285953 | 58 / 0Â Â Â Â Â |
| Serine/threonine-protein kinase AKT | AKT3 | Q9Y243 | CHEMBL4816 | Kinase | 0.113285953 | 16 / 0Â Â Â Â Â |
| Neuronal acetylcholine receptor; alpha3/alpha6/beta2/beta3 | CHRNB3 CHRNA6 CHRNB2 CHRNA3 | Q05901 Q15825 P17787 P32297 | CHEMBL2109233 | Ligand-gated ion channel | 0.113285953 | 4 / 0Â Â Â Â Â |
| Tyrosine-protein kinase JAK3 | JAK3 | P52333 | CHEMBL2148 | Kinase | 0.113285953 | 63 / 0Â Â Â Â Â |
| Tyrosine-protein kinase JAK2 | JAK2 | O60674 | CHEMBL2971 | Kinase | 0.113285953 | 103 / 0Â Â Â Â Â |
| Choline kinase alpha | CHKA | P35790 | CHEMBL3117 | Enzyme | 0.113285953 | 1 / 0Â Â Â Â Â |
| Tyrosine-protein kinase TYK2 | TYK2 | P29597 | CHEMBL3553 | Kinase | 0.113285953 | 26 / 0Â Â Â Â Â |
| Dipeptidyl peptidase II | DPP7 | Q9UHL4 | CHEMBL3976 | Protease | 0.113285953 | 17 / 0Â Â Â Â Â |
| Neuronal acetylcholine receptor protein alpha-4 subunit | CHRNA4 | P43681 | CHEMBL1882 | Ligand-gated ion channel | 0.113285953 | 10 / 0Â Â Â Â Â |
| Fibroblast activation protein alpha | FAP | Q12884 | CHEMBL4683 | Protease | 0.113285953 | 2 / 0Â Â Â Â Â |
| Serine/threonine-protein kinase receptor R3 | ACVRL1 | P37023 | CHEMBL5311 | Kinase | 0.113285953 | 22 / 0Â Â Â Â Â |
| Butyrylcholinesterase | BCHE | P06276 | CHEMBL1914 | Hydrolase | 0.113285953 | 15 / 0Â Â Â Â Â |
| Leukotriene A4 hydrolase | LTA4H | P09960 | CHEMBL4618 | Protease | 0.113285953 | 16 / 0Â Â Â Â Â |
| Urokinase-type plasminogen activator | PLAU | P00749 | CHEMBL3286 | Protease | 0.113285953 | 15 / 0Â Â Â Â Â |
| Histone-lysine N-methyltransferase, H3 lysine-79 specific | DOT1L | Q8TEK3 | CHEMBL1795117 | Writer | 0.113285953 | 3 / 0Â Â Â Â Â |
| Thrombin and coagulation factor X | F10 | P00742 | CHEMBL244 | Protease | 0.113285953 | 55 / 0Â Â Â Â Â |
| Methionine aminopeptidase 2 | METAP2 | P50579 | CHEMBL3922 | Protease | 0.113285953 | 42 / 0Â Â Â Â Â |
| Inhibitor of apoptosis protein 3 | XIAP | P98170 | CHEMBL4198 | Other cytosolic protein | 0.113285953 | 101 / 0Â Â Â Â Â |
| Baculoviral IAP repeat-containing protein 2 | BIRC2 | Q13490 | CHEMBL5462 | Enzyme | 0.113285953 | 71 / 0Â Â Â Â Â |
| CREB-binding protein/p53 | CREBBP | Q92793 | CHEMBL5747 | Writer | 0.113285953 | 7 / 0Â Â Â Â Â |
| Nitric-oxide synthase, brain | NOS1 | P29475 | CHEMBL3568 | Enzyme | 0.113285953 | 33 / 0Â Â Â Â Â |
| Neuropeptide Y receptor type 1 | NPY1R | P25929 | CHEMBL4777 | Family A G protein-coupled receptor | 0.113285953 | 24 / 0Â Â Â Â Â |
| Smoothened homolog | SMO | Q99835 | CHEMBL5971 | Frizzled family G protein-coupled receptor | 0.113285953 | 13 / 4Â Â Â Â Â |
| Bromodomain-containing protein 4 | BRD4 | O60885 | CHEMBL1163125 | Reader | 0.113285953 | 17 / 0Â Â Â Â Â |
| Serotonin 4 (5-HT4) receptor | HTR4 | Q13639 | CHEMBL1875 | Family A G protein-coupled receptor | 0.113285953 | 50 / 0Â Â Â Â Â |
| S-methyl-5-thioadenosine phosphorylase | MTAP | Q13126 | CHEMBL4941 | Enzyme | 0.113285953 | 30 / 0Â Â Â Â Â |
| Lysine-specific histone demethylase 1 | KDM1A | O60341 | CHEMBL6136 | Eraser | 0.113285953 | 1 / 0Â Â Â Â Â |
| Adrenergic receptor beta | ADRB2 | P07550 | CHEMBL210 | Family A G protein-coupled receptor | 0.113285953 | 202 / 0Â Â Â Â Â |
| Beta-1 adrenergic receptor | ADRB1 | P08588 | CHEMBL213 | Family A G protein-coupled receptor | 0.113285953 | 167 / 0Â Â Â Â Â |
| Beta-3 adrenergic receptor | ADRB3 | P13945 | CHEMBL246 | Family A G protein-coupled receptor | 0.113285953 | 173 / 0Â Â Â Â Â |
| Nerve growth factor receptor Trk-A | NTRK1 | P04629 | CHEMBL2815 | Kinase | 0.113285953 | 52 / 0Â Â Â Â Â |
| Phenylethanolamine N-methyltransferase | PNMT | P11086 | CHEMBL4617 | Enzyme | 0.113285953 | 12 / 0Â Â Â Â Â |
| Rho-associated protein kinase 1 | ROCK1 | Q13464 | CHEMBL3231 | Kinase | 0.113285953 | 22 / 0Â Â Â Â Â |
| Serine/threonine-protein kinase MRCK-A | CDC42BPA | Q5VT25 | CHEMBL4516 | Kinase | 0.113285953 | 5 / 0Â Â Â Â Â |
| Leucine-rich repeat serine/threonine-protein kinase 2 | LRRK2 | Q5S007 | CHEMBL1075104 | Kinase | 0.113285953 | 16 / 0Â Â Â Â Â |
| GABA-A receptor; alpha-3/beta-3/gamma-2 | GABRB3 GABRA3 GABRG2 | P28472 P34903 P18507 | CHEMBL2094120 | Ligand-gated ion channel | 0.113285953 | 5 / 0Â Â Â Â Â |
| GABA-A receptor; alpha-1/beta-3/gamma-2 | GABRB3 GABRG2 GABRA1 | P28472 P18507 P14867 | CHEMBL2094121 | Ligand-gated ion channel | 0.113285953 | 5 / 0Â Â Â Â Â |
| GABA-A receptor; alpha-5/beta-3/gamma-2 | GABRB3 GABRG2 GABRA5 | P28472 P18507 P31644 | CHEMBL2094122 | Ligand-gated ion channel | 0.113285953 | 6 / 0Â Â Â Â Â |
| GABA-A receptor; alpha-2/beta-3/gamma-2 | GABRA2 GABRB3 GABRG2 | P47869 P28472 P18507 | CHEMBL2094130 | Ligand-gated ion channel | 0.113285953 | 5 / 0Â Â Â Â Â |
| Transketolase | TKT | P29401 | CHEMBL4983 | Enzyme | 0.113285953 | 28 / 0Â Â Â Â Â |
| C-C chemokine receptor type 1 | CCR1 | P32246 | CHEMBL2413 | Family A G protein-coupled receptor | 0.113285953 | 168 / 0Â Â Â Â Â |
| Cyclin-dependent kinase 9 | CDK9 | P50750 | CHEMBL3116 | Kinase | 0.113285953 | 54 / 0Â Â Â Â Â |
| Serine/threonine-protein kinase ILK-1 | ILK | Q13418 | CHEMBL5247 | Kinase | 0.113285953 | 40 / 0Â Â Â Â Â |
| Peptide N-myristoyltransferase 1 | NMT1 | P30419 | CHEMBL2593 | Enzyme | 0.113285953 | 17 / 0Â Â Â Â Â |
| MAP kinase p38 alpha | MAPK14 | Q16539 | CHEMBL260 | Kinase | 0.113285953 | 108 / 0Â Â Â Â Â |
| Glycogen synthase kinase-3 alpha | GSK3A | P49840 | CHEMBL2850 | Kinase | 0.113285953 | 14 / 0Â Â Â Â Â |
| DNA-dependent protein kinase | PRKDC | P78527 | CHEMBL3142 | Kinase | 0.113285953 | 53 / 0Â Â Â Â Â |
| MAP kinase p38 beta | MAPK11 | Q15759 | CHEMBL3961 | Kinase | 0.113285953 | 16 / 0Â Â Â Â Â |
| Kynureninase | KYNU | Q16719 | CHEMBL5100 | Enzyme | 0.155759218 | 4 / 2Â Â Â Â Â |
| Glycogen synthase kinase-3 beta | GSK3B | P49841 | CHEMBL262 | Kinase | 0.130706653 | 17 / 49Â Â Â Â Â |
| Neuronal acetylcholine receptor; alpha4/beta2 | CHRNA4 CHRNB2 | P43681 P17787 | CHEMBL1907589 | Ligand-gated ion channel | 0.109339753 | 15 / 0Â Â Â Â Â |
| Neuronal acetylcholine receptor protein alpha-7 subunit | CHRNA7 | P36544 | CHEMBL2492 | Ligand-gated ion channel | 0.109339753 | 10 / 0Â Â Â Â Â |
| Rho-associated protein kinase 2 | ROCK2 | O75116 | CHEMBL2973 | Kinase | 0.109339753 | 127 / 0Â Â Â Â Â |
| Serine/threonine-protein kinase Chk1 | CHEK1 | O14757 | CHEMBL4630 | Kinase | 0.109339753 | 150 / 0Â Â Â Â Â |
| p53-binding protein Mdm-2 | MDM2 | Q00987 | CHEMBL5023 | Other nuclear protein | 0.109339753 | 145 / 0Â Â Â Â Â |
| Dopamine D1 receptor | DRD1 | P21728 | CHEMBL2056 | Family A G protein-coupled receptor | 0.109339753 | 41 / 0Â Â Â Â Â |
| Serotonin 2a (5-HT2a) receptor | HTR2A | P28223 | CHEMBL224 | Family A G protein-coupled receptor | 0.109339753 | 408 / 0Â Â Â Â Â |
| Dopamine D3 receptor | DRD3 | P35462 | CHEMBL234 | Family A G protein-coupled receptor | 0.109339753 | 394 / 0Â Â Â Â Â |
| Mu opioid receptor | OPRM1 | P35372 | CHEMBL233 | Family A G protein-coupled receptor | 0.109339753 | 693 / 0Â Â Â Â Â |
| Delta opioid receptor | OPRD1 | P41143 | CHEMBL236 | Family A G protein-coupled receptor | 0.109339753 | 540 / 0Â Â Â Â Â |
| Dopamine transporter (by homology) | SLC6A3 | Q01959 | CHEMBL238 | Electrochemical transporter | 0.109339753 | 291 / 0Â Â Â Â Â |
| Tyrosine-protein kinase SYK | SYK | P43405 | CHEMBL2599 | Kinase | 0.109339753 | 345 / 0Â Â Â Â Â |
| Heat shock protein HSP 90-beta | HSP90AB1 | P08238 | CHEMBL4303 | Other cytosolic protein | 0.109339753 | 37 / 0Â Â Â Â Â |
| Muscarinic acetylcholine receptor M2 | CHRM2 | P08172 | CHEMBL211 | Family A G protein-coupled receptor | 0.109339753 | 111 / 0Â Â Â Â Â |
| Muscarinic acetylcholine receptor M1 | CHRM1 | P11229 | CHEMBL216 | Family A G protein-coupled receptor | 0.109339753 | 120 / 0Â Â Â Â Â |
| Muscarinic acetylcholine receptor M3 | CHRM3 | P20309 | CHEMBL245 | Family A G protein-coupled receptor | 0.109339753 | 113 / 0Â Â Â Â Â |
| GABA receptor alpha-5 subunit | GABRA5 | P31644 | CHEMBL5112 | Ligand-gated ion channel | 0.109339753 | 44 / 0Â Â Â Â Â |
| Protein arginine N-methyltransferase 6 | PRMT6 | Q96LA8 | CHEMBL1275221 | Writer | 0.109339753 | 3 / 0Â Â Â Â Â |
| Protein arginine N-methyltransferase 8 | PRMT8 | Q9NR22 | CHEMBL3108648 | Writer | 0.109339753 | 3 / 0Â Â Â Â Â |
| Protein-arginine N-methyltransferase 1 | PRMT1 | Q99873 | CHEMBL5524 | Writer | 0.109339753 | 3 / 0Â Â Â Â Â |
| PI3-kinase p110-alpha subunit | PIK3CA | P42336 | CHEMBL4005 | Enzyme | 0.109339753 | 407 / 0Â Â Â Â Â |
| Nociceptin receptor | OPRL1 | P41146 | CHEMBL2014 | Family A G protein-coupled receptor | 0.109339753 | 134 / 0Â Â Â Â Â |
| Norepinephrine transporter | SLC6A2 | P23975 | CHEMBL222 | Electrochemical transporter | 0.109339753 | 118 / 0Â Â Â Â Â |
| Cathepsin D | CTSD | P07339 | CHEMBL2581 | Protease | 0.109339753 | 102 / 0Â Â Â Â Â |
| MAP kinase signal-integrating kinase 2 | MKNK2 | Q9HBH9 | CHEMBL4204 | Kinase | 0.109339753 | 46 / 0Â Â Â Â Â |
| Beta-secretase 1 | BACE1 | P56817 | CHEMBL4822 | Protease | 0.109339753 | 377 / 0Â Â Â Â Â |
| Mitogen-activated protein kinase kinase kinase 14 | MAP3K14 | Q99558 | CHEMBL5888 | Kinase | 0.109339753 | 183 / 0Â Â Â Â Â |
| Epidermal growth factor receptor erbB1 | EGFR | P00533 | CHEMBL203 | Kinase | 0.109339753 | 266 / 0Â Â Â Â Â |
| Serotonin 3a (5-HT3a) receptor | HTR3A | P46098 | CHEMBL1899 | Ligand-gated ion channel | 0.109339753 | 45 / 0Â Â Â Â Â |
| DNA-dependent protein kinase | PRKDC | P78527 | CHEMBL3142 | Kinase | 0.109339753 | 95 / 0Â Â Â Â Â |
| Serine/threonine-protein kinase AKT2 | AKT2 | P31751 | CHEMBL2431 | Kinase | 0.109339753 | 74 / 0Â Â Â Â Â |
| Serine/threonine-protein kinase AKT | AKT1 | P31749 | CHEMBL4282 | Kinase | 0.109339753 | 147 / 0Â Â Â Â Â |
| Serine/threonine-protein kinase AKT | AKT3 | Q9Y243 | CHEMBL4816 | Kinase | 0.109339753 | 49 / 0Â Â Â Â Â |
| Serine/threonine-protein kinase ILK-1 | ILK | Q13418 | CHEMBL5247 | Kinase | 0.109339753 | 41 / 0Â Â Â Â Â |
| Adenosine kinase | ADK | P55263 | CHEMBL3589 | Enzyme | 0.109339753 | 78 / 0Â Â Â Â Â |
| Multidrug resistance-associated protein 1 | ABCC1 | P33527 | CHEMBL3004 | Primary active transporter | 0.109339753 | 10 / 0Â Â Â Â Â |
| P-glycoprotein 1 (by homology) | ABCB1 | P08183 | CHEMBL4302 | Primary active transporter | 0.109339753 | 123 / 0Â Â Â Â Â |
| Serotonin 2b (5-HT2b) receptor | HTR2B | P41595 | CHEMBL1833 | Family A G protein-coupled receptor | 0.109339753 | 44 / 0Â Â Â Â Â |
| Alpha-2a adrenergic receptor | ADRA2A | P08913 | CHEMBL1867 | Family A G protein-coupled receptor | 0.109339753 | 57 / 0Â Â Â Â Â |
| Serotonin 1b (5-HT1b) receptor (by homology) | HTR1B | P28222 | CHEMBL1898 | Family A G protein-coupled receptor | 0.109339753 | 85 / 0Â Â Â Â Â |
| Alpha-2b adrenergic receptor | ADRA2B | P18089 | CHEMBL1942 | Family A G protein-coupled receptor | 0.109339753 | 48 / 0Â Â Â Â Â |
| Neuronal acetylcholine receptor; alpha3/beta2 | CHRNA3 CHRNB2 | P32297 P17787 | CHEMBL2109234 | Ligand-gated ion channel | 0.109339753 | 5 / 0Â Â Â Â Â |
| Dipeptidyl peptidase I | CTSC | P53634 | CHEMBL2252 | Protease | 0.109339753 | 12 / 0Â Â Â Â Â |
| Serotonin 2c (5-HT2c) receptor | HTR2C | P28335 | CHEMBL225 | Family A G protein-coupled receptor | 0.109339753 | 94 / 0Â Â Â Â Â |
| Cathepsin K | CTSK | P43235 | CHEMBL268 | Protease | 0.109339753 | 50 / 0Â Â Â Â Â |
| Serotonin 6 (5-HT6) receptor | HTR6 | P50406 | CHEMBL3371 | Family A G protein-coupled receptor | 0.109339753 | 185 / 0Â Â Â Â Â |
| Sodium channel protein type IX alpha subunit | SCN9A | Q15858 | CHEMBL4296 | Voltage-gated ion channel | 0.109339753 | 116 / 0Â Â Â Â Â |
| Ghrelin receptor | GHSR | Q92847 | CHEMBL4616 | Family A G protein-coupled receptor | 0.109339753 | 56 / 0Â Â Â Â Â |
| Monoamine oxidase B | MAOB | P27338 | CHEMBL2039 | Oxidoreductase | 0.109339753 | 6 / 0Â Â Â Â Â |
| Serine/threonine-protein kinase mTOR | MTOR | P42345 | CHEMBL2842 | Kinase | 0.109339753 | 490 / 0Â Â Â Â Â |
| Dipeptidyl peptidase IV | DPP4 | P27487 | CHEMBL284 | Protease | 0.109339753 | 257 / 0Â Â Â Â Â |
| Muscarinic acetylcholine receptor M5 | CHRM5 | P08912 | CHEMBL2035 | Family A G protein-coupled receptor | 0.109339753 | 22 / 0Â Â Â Â Â |
| Phosphodiesterase 9A | PDE9A | O76083 | CHEMBL3535 | Phosphodiesterase | 0.109339753 | 15 / 0Â Â Â Â Â |
| Leukotriene A4 hydrolase | LTA4H | P09960 | CHEMBL4618 | Protease | 0.109339753 | 67 / 0Â Â Â Â Â |
| Phosphodiesterase 1C | PDE1C | Q14123 | CHEMBL4619 | Phosphodiesterase | 0.109339753 | 12 / 0Â Â Â Â Â |
| Synaptic vesicular amine transporter (by homology) | SLC18A2 | Q05940 | CHEMBL1893 | Electrochemical transporter | 0.109339753 | 45 / 0Â Â Â Â Â |
| Mitogen-activated protein kinase kinase kinase 12 | MAP3K12 | Q12852 | CHEMBL1908389 | Enzyme | 0.109339753 | 26 / 0Â Â Â Â Â |
| Serotonin 1a (5-HT1a) receptor | HTR1A | P08908 | CHEMBL214 | Family A G protein-coupled receptor | 0.109339753 | 206 / 0Â Â Â Â Â |
| Glycogen synthase kinase-3 beta | GSK3B | P49841 | CHEMBL262 | Kinase | 0.109339753 | 117 / 0Â Â Â Â Â |
| Dual specificity protein phosphatase 3 | DUSP3 | P51452 | CHEMBL2635 | Phosphatase | 0.109339753 | 2 / 0Â Â Â Â Â |
| Serotonin 7 (5-HT7) receptor | HTR7 | P34969 | CHEMBL3155 | Family A G protein-coupled receptor | 0.109339753 | 53 / 0Â Â Â Â Â |
| Bradykinin B1 receptor | BDKRB1 | P46663 | CHEMBL4308 | Family A G protein-coupled receptor | 0.109339753 | 38 / 0Â Â Â Â Â |
| Serotonin 5a (5-HT5a) receptor | HTR5A | P47898 | CHEMBL3426 | Family A G protein-coupled receptor | 0.109339753 | 5 / 0Â Â Â Â Â |
| Histone-lysine N-methyltransferase, H3 lysine-9 specific 3 | EHMT2 | Q96KQ7 | CHEMBL6032 | Writer | 0.109339753 | 4 / 0Â Â Â Â Â |
| Poly [ADP-ribose] polymerase-1 | PARP1 | P09874 | CHEMBL3105 | Enzyme | 0.109339753 | 62 / 0Â Â Â Â Â |
| Cyclin-dependent kinase 9 | CDK9 | P50750 | CHEMBL3116 | Kinase | 0.109339753 | 82 / 0Â Â Â Â Â |
| Inhibitor of apoptosis protein 3 | XIAP | P98170 | CHEMBL4198 | Other cytosolic protein | 0.109339753 | 93 / 0Â Â Â Â Â |
| Baculoviral IAP repeat-containing protein 2 | BIRC2 | Q13490 | CHEMBL5462 | Enzyme | 0.109339753 | 45 / 0Â Â Â Â Â |
| Alpha-1d adrenergic receptor | ADRA1D | P25100 | CHEMBL223 | Family A G protein-coupled receptor | 0.109339753 | 123 / 0Â Â Â Â Â |
| Alpha-1a adrenergic receptor | ADRA1A | P35348 | CHEMBL229 | Family A G protein-coupled receptor | 0.109339753 | 164 / 0Â Â Â Â Â |
| Alpha-1b adrenergic receptor | ADRA1B | P35368 | CHEMBL232 | Family A G protein-coupled receptor | 0.109339753 | 117 / 0Â Â Â Â Â |
| Estrogen receptor beta | ESR2 | Q92731 | CHEMBL242 | Nuclear receptor | 0.109339753 | 57 / 0Â Â Â Â Â |
| Histone-lysine N-methyltransferase, H3 lysine-79 specific | DOT1L | Q8TEK3 | CHEMBL1795117 | Writer | 0.109339753 | 10 / 0Â Â Â Â Â |
| Receptor protein-tyrosine kinase erbB-2 | ERBB2 | P04626 | CHEMBL1824 | Kinase | 0.109339753 | 65 / 0Â Â Â Â Â |
| Kinesin-1 heavy chain/ Tyrosine-protein kinase receptor RET | RET | P07949 | CHEMBL2041 | Kinase | 0.109339753 | 38 / 0Â Â Â Â Â |
| Thrombin | F2 | P00734 | CHEMBL204 | Protease | 0.109339753 | 133 / 0Â Â Â Â Â |
| Ribosomal protein S6 kinase alpha 3 | RPS6KA3 | P51812 | CHEMBL2345 | Kinase | 0.109339753 | 8 / 0Â Â Â Â Â |
| Beta-3 adrenergic receptor | ADRB3 | P13945 | CHEMBL246 | Family A G protein-coupled receptor | 0.109339753 | 233 / 0Â Â Â Â Â |
| Macrophage-stimulating protein receptor | MST1R | Q04912 | CHEMBL2689 | Kinase | 0.109339753 | 6 / 0Â Â Â Â Â |
| Receptor protein-tyrosine kinase erbB-4 | ERBB4 | Q15303 | CHEMBL3009 | Kinase | 0.109339753 | 10 / 0Â Â Â Â Â |
| Interleukin-1 receptor-associated kinase 1 | IRAK1 | P51617 | CHEMBL3357 | Kinase | 0.109339753 | 8 / 0Â Â Â Â Â |
| Nitric-oxide synthase, brain | NOS1 | P29475 | CHEMBL3568 | Enzyme | 0.109339753 | 28 / 0Â Â Â Â Â |
| Interleukin-1 receptor-associated kinase 4 | IRAK4 | Q9NWZ3 | CHEMBL3778 | Kinase | 0.109339753 | 54 / 0Â Â Â Â Â |
| Ribosomal protein S6 kinase 1 | RPS6KB1 | P23443 | CHEMBL4501 | Kinase | 0.109339753 | 30 / 0Â Â Â Â Â |
| Beta-chymotrypsin | CTRB1 | P17538 | CHEMBL4796 | Protease | 0.109339753 | 3 / 0Â Â Â Â Â |
| Mitogen-activated protein kinase kinase kinase 7 | MAP3K7 | O43318 | CHEMBL5776 | Kinase | 0.109339753 | 14 / 0Â Â Â Â Â |
| Adrenergic receptor alpha-2 | ADRA2C | P18825 | CHEMBL1916 | Family A G protein-coupled receptor | 0.109339753 | 56 / 0Â Â Â Â Â |
| Monoamine oxidase A | MAOA | P21397 | CHEMBL1951 | Oxidoreductase | 0.109339753 | 7 / 0Â Â Â Â Â |
| cGMP-dependent protein kinase 1 beta | PRKG1 | Q13976 | CHEMBL4273 | Kinase | 0.109339753 | 2 / 0Â Â Â Â Â |
| Cytochrome P450 2D6 | CYP2D6 | P10635 | CHEMBL289 | Cytochrome P450 | 0.109339753 | 5 / 0Â Â Â Â Â |
| Cyclin-dependent kinase 7 | CDK7 | P50613 | CHEMBL3055 | Kinase | 0.109339753 | 9 / 0Â Â Â Â Â |
| Serotonin 4 (5-HT4) receptor | HTR4 | Q13639 | CHEMBL1875 | Family A G protein-coupled receptor | 0.109339753 | 76 / 0Â Â Â Â Â |
| Heat shock protein HSP 90-alpha | HSP90AA1 | P07900 | CHEMBL3880 | Other cytosolic protein | 0.109339753 | 55 / 0Â Â Â Â Â |
| Phosphodiesterase 7A | PDE7A | Q13946 | CHEMBL3012 | Phosphodiesterase | 0.109339753 | 28 / 0Â Â Â Â Â |
| Maternal embryonic leucine zipper kinase | MELK | Q14680 | CHEMBL4578 | Kinase | 0.109339753 | 13 / 0Â Â Â Â Â |
| Serine/threonine-protein kinase Aurora-A | AURKA | O14965 | CHEMBL4722 | Kinase | 0.109339753 | 136 / 0Â Â Â Â Â |
| Homeodomain-interacting protein kinase 4 | HIPK4 | Q8NE63 | CHEMBL1075167 | Kinase | 0.109339753 | 6 / 0Â Â Â Â Â |
| Serine/threonine-protein kinase SBK1 | SBK1 | Q52WX2 | CHEMBL1163129 | Kinase | 0.109339753 | 5 / 0Â Â Â Â Â |
| Tyrosine-protein kinase ABL | ABL1 | P00519 | CHEMBL1862 | Kinase | 0.109339753 | 75 / 0Â Â Â Â Â |
| Tyrosine-protein kinase receptor FLT3 | FLT3 | P36888 | CHEMBL1974 | Kinase | 0.109339753 | 96 / 0Â Â Â Â Â |
| Cathepsin (V and K) | CTSV | O60911 | CHEMBL3272 | Protease | 0.322632471 | 27 / 12Â Â Â Â Â |
| Adenosine A2a receptor (by homology) | ADORA2A | P29274 | CHEMBL251 | Family A G protein-coupled receptor | 0.136969565 | 376 / 1Â Â Â Â Â |
| Cytochrome P450 19A1 | CYP19A1 | P11511 | CHEMBL1978 | Cytochrome P450 | 0.104671941 | 294 / 10Â Â Â Â Â |
| Orexin receptor 2 | HCRTR2 | O43614 | CHEMBL4792 | Family A G protein-coupled receptor | 0.104671941 | 756 / 0Â Â Â Â Â |
| Orexin receptor 1 | HCRTR1 | O43613 | CHEMBL5113 | Family A G protein-coupled receptor | 0.104671941 | 613 / 0Â Â Â Â Â |
| Quinone reductase 2 | NQO2 | P16083 | CHEMBL3959 | Enzyme | 0.104671941 | 55 / 14Â Â Â Â Â |
| Protein farnesyltransferase | FNTA FNTB | P49354 P49356 | CHEMBL2094108 | Enzyme | 0.104671941 | 200 / 0Â Â Â Â Â |
| Geranylgeranyl transferase type I | PGGT1B FNTA | P53609 P49354 | CHEMBL2095164 | Enzyme | 0.104671941 | 67 / 0Â Â Â Â Â |
| 11-beta-hydroxysteroid dehydrogenase 1 | HSD11B1 | P28845 | CHEMBL4235 | Enzyme | 0.104671941 | 337 / 0Â Â Â Â Â |
| Metabotropic glutamate receptor 5 | GRM5 | P41594 | CHEMBL3227 | Family C G protein-coupled receptor | 0.104671941 | 667 / 0Â Â Â Â Â |
| Phosphodiesterase 10A (by homology) | PDE10A | Q9Y233 | CHEMBL4409 | Phosphodiesterase | 0.104671941 | 920 / 0Â Â Â Â Â |
| Phosphodiesterase 4D | PDE4D | Q08499 | CHEMBL288 | Phosphodiesterase | 0.104671941 | 64 / 0Â Â Â Â Â |
| Bradykinin B2 receptor | BDKRB2 | P30411 | CHEMBL3157 | Family A G protein-coupled receptor | 0.104671941 | 24 / 0Â Â Â Â Â |
| Phosphatidylinositol-5-phosphate 4-kinase type-2 gamma | PIP4K2C | Q8TBX8 | CHEMBL1770034 | Enzyme | 0.104671941 | 18 / 0Â Â Â Â Â |
| c-Jun N-terminal kinase 1 | MAPK8 | P45983 | CHEMBL2276 | Kinase | 0.104671941 | 243 / 0Â Â Â Â Â |
| MAP kinase p38 alpha | MAPK14 | Q16539 | CHEMBL260 | Kinase | 0.104671941 | 492 / 0Â Â Â Â Â |
| c-Jun N-terminal kinase 3 | MAPK10 | P53779 | CHEMBL2637 | Kinase | 0.104671941 | 163 / 0Â Â Â Â Â |
| SPS1/STE20-related protein kinase YSK4 | MAP3K19 | Q56UN5 | CHEMBL6191 | Kinase | 0.104671941 | 5 / 0Â Â Â Â Â |
| Dual specificity mitogen-activated protein kinase kinase 1 | MAP2K1 | Q02750 | CHEMBL3587 | Kinase | 0.104671941 | 35 / 0Â Â Â Â Â |
| Transient receptor potential cation channel subfamily A member 1 | TRPA1 | O75762 | CHEMBL6007 | Voltage-gated ion channel | 0.104671941 | 33 / 0Â Â Â Â Â |
| Vascular endothelial growth factor receptor 2 | KDR | P35968 | CHEMBL279 | Kinase | 0.104671941 | 377 / 25Â Â Â Â Â |
| Urotensin II receptor | UTS2R | Q9UKP6 | CHEMBL3764 | Family A G protein-coupled receptor | 0.104671941 | 8 / 0Â Â Â Â Â |
| Prolyl endopeptidase | PREP | P48147 | CHEMBL3202 | Protease | 0.104671941 | 130 / 0Â Â Â Â Â |
| Fibroblast activation protein alpha (by homology) | FAP | Q12884 | CHEMBL4683 | Protease | 0.104671941 | 60 / 0Â Â Â Â Â |
| ATP-binding cassette sub-family G member 2 | ABCG2 | Q9UNQ0 | CHEMBL5393 | Primary active transporter | 0.104671941 | 34 / 4Â Â Â Â Â |
| Melatonin receptor 1A | MTNR1A | P48039 | CHEMBL1945 | Family A G protein-coupled receptor | 0.104671941 | 427 / 0Â Â Â Â Â |
| Melatonin receptor 1B | MTNR1B | P49286 | CHEMBL1946 | Family A G protein-coupled receptor | 0.104671941 | 356 / 0Â Â Â Â Â |
| Phosphodiesterase 4A | PDE4A | P27815 | CHEMBL254 | Phosphodiesterase | 0.104671941 | 86 / 0Â Â Â Â Â |
| Adenosine A1 receptor (by homology) | ADORA1 | P30542 | CHEMBL226 | Family A G protein-coupled receptor | 0.104671941 | 501 / 0Â Â Â Â Â |
| Voltage-gated potassium channel subunit Kv1.5 | KCNA5 | P22460 | CHEMBL4306 | Voltage-gated ion channel | 0.104671941 | 131 / 0Â Â Â Â Â |
| Adenosine A3 receptor | ADORA3 | P0DMS8 | CHEMBL256 | Family A G protein-coupled receptor | 0.104671941 | 238 / 0Â Â Â Â Â |
| Arachidonate 5-lipoxygenase | ALOX5 | P09917 | CHEMBL215 | Oxidoreductase | 0.104671941 | 67 / 0Â Â Â Â Â |
| Phosphodiesterase 2A | PDE2A | O00408 | CHEMBL2652 | Phosphodiesterase | 0.104671941 | 171 / 0Â Â Â Â Â |
| DNA-dependent protein kinase | PRKDC | P78527 | CHEMBL3142 | Kinase | 0.104671941 | 90 / 0Â Â Â Â Â |
| Cathepsin (B and K) | CTSB | P07858 | CHEMBL4072 | Protease | 0.104671941 | 124 / 0Â Â Â Â Â |
| Receptor protein-tyrosine kinase erbB-2 | ERBB2 | P04626 | CHEMBL1824 | Kinase | 0.104671941 | 82 / 0Â Â Â Â Â |
| Poly [ADP-ribose] polymerase 2 | PARP2 | Q9UGN5 | CHEMBL5366 | Enzyme | 0.104671941 | 23 / 0Â Â Â Â Â |
| Sodium channel protein type X alpha subunit (by homology) | SCN10A | Q9Y5Y9 | CHEMBL5451 | Voltage-gated ion channel | 0.104671941 | 45 / 0Â Â Â Â Â |
| Tankyrase-2 | TNKS2 | Q9H2K2 | CHEMBL6154 | Enzyme | 0.104671941 | 62 / 0Â Â Â Â Â |
| Tankyrase-1 | TNKS | O95271 | CHEMBL6164 | Enzyme | 0.104671941 | 48 / 0Â Â Â Â Â |
| Glutamate NMDA receptor; GRIN1/GRIN2A | GRIN2A GRIN1 | Q12879 Q05586 | CHEMBL1907604 | Ligand-gated ion channel | 0.104671941 | 15 / 0Â Â Â Â Â |
| Focal adhesion kinase 1 | PTK2 | Q05397 | CHEMBL2695 | Kinase | 0.104671941 | 69 / 0Â Â Â Â Â |
| Glutamate receptor ionotropic, AMPA 2 | GRIA2 | P42262 | CHEMBL4016 | Ligand-gated ion channel | 0.104671941 | 7 / 0Â Â Â Â Â |
| Metabotropic glutamate receptor 2 | GRM2 | Q14416 | CHEMBL5137 | Family C G protein-coupled receptor | 0.104671941 | 35 / 0Â Â Â Â Â |
| Tyrosine-protein kinase SYK | SYK | P43405 | CHEMBL2599 | Kinase | 0.104671941 | 83 / 0Â Â Â Â Â |
| Phosphodiesterase 4B | PDE4B | Q07343 | CHEMBL275 | Phosphodiesterase | 0.104671941 | 139 / 0Â Â Â Â Â |
| Beta-glucuronidase | GUSB | P08236 | CHEMBL2728 | Enzyme | 0.104671941 | 2 / 0Â Â Â Â Â |
| Angiotensin-converting enzyme | ACE | P12821 | CHEMBL1808 | Protease | 0.104671941 | 5 / 0Â Â Â Â Â |
| CDK8/Cyclin C | CCNC CDK8 | P24863 P49336 | CHEMBL3038474 | Kinase | 0.104671941 | 18 / 0Â Â Â Â Â |
| Poly [ADP-ribose] polymerase-1 | PARP1 | P09874 | CHEMBL3105 | Enzyme | 0.104671941 | 212 / 0Â Â Â Â Â |
| Tumor necrosis factor receptor R1 | TNFRSF1A | P19438 | CHEMBL3378 | Membrane receptor | 0.104671941 | 17 / 0Â Â Â Â Â |
| Voltage-gated N-type calcium channel alpha-1B subunit | CACNA1B | Q00975 | CHEMBL4478 | Voltage-gated ion channel | 0.104671941 | 26 / 0Â Â Â Â Â |
| Neuropeptide Y receptor type 5 | NPY5R | Q15761 | CHEMBL4561 | Family A G protein-coupled receptor | 0.104671941 | 134 / 0Â Â Â Â Â |
| Leucine-rich repeat serine/threonine-protein kinase 2 | LRRK2 | Q5S007 | CHEMBL1075104 | Kinase | 0.104671941 | 89 / 0Â Â Â Â Â |
| Prostanoid EP1 receptor (by homology) | PTGER1 | P34995 | CHEMBL1811 | Family A G protein-coupled receptor | 0.104671941 | 31 / 0Â Â Â Â Â |
| Glycogen synthase kinase-3 beta | GSK3B | P49841 | CHEMBL262 | Kinase | 0.104671941 | 261 / 0Â Â Â Â Â |
| PI3-kinase p110-delta subunit | PIK3CD | O00329 | CHEMBL3130 | Enzyme | 0.104671941 | 145 / 0Â Â Â Â Â |
| PI3-kinase p110-beta subunit | PIK3CB | P42338 | CHEMBL3145 | Enzyme | 0.104671941 | 79 / 0Â Â Â Â Â |
| Tyrosine-protein kinase HCK | HCK | P08631 | CHEMBL3234 | Kinase | 0.104671941 | 42 / 0Â Â Â Â Â |
| PI3-kinase p110-gamma subunit | PIK3CG | P48736 | CHEMBL3267 | Enzyme | 0.104671941 | 94 / 0Â Â Â Â Â |
| PI4-kinase beta subunit | PI4KB | Q9UBF8 | CHEMBL3268 | Enzyme | 0.104671941 | 22 / 0Â Â Â Â Â |
| PI3-kinase p110-alpha subunit | PIK3CA | P42336 | CHEMBL4005 | Enzyme | 0.104671941 | 188 / 0Â Â Â Â Â |
| Serotonin 2b (5-HT2b) receptor | HTR2B | P41595 | CHEMBL1833 | Family A G protein-coupled receptor | 0.104671941 | 55 / 0Â Â Â Â Â |
| Glyceraldehyde-3-phosphate dehydrogenase liver | GAPDH | P04406 | CHEMBL2284 | Oxidoreductase | 0.104671941 | 2 / 0Â Â Â Â Â |
| Tyrosine-protein kinase FYN | FYN | P06241 | CHEMBL1841 | Kinase | 0.104671941 | 15 / 0Â Â Â Â Â |
| Cytochrome P450 11B1 | CYP11B1 | P15538 | CHEMBL1908 | Cytochrome P450 | 0.104671941 | 146 / 0Â Â Â Â Â |
| Thyroid hormone receptor beta-1 | THRB | P10828 | CHEMBL1947 | Nuclear receptor | 0.104671941 | 17 / 0Â Â Â Â Â |
| Cytochrome P450 11B2 | CYP11B2 | P19099 | CHEMBL2722 | Cytochrome P450 | 0.104671941 | 178 / 0Â Â Â Â Â |
| Intercellular adhesion molecule-1 | ICAM1 | P05362 | CHEMBL3070 | Adhesion | 0.104671941 | 18 / 0Â Â Â Â Â |
| Vascular cell adhesion protein 1 | VCAM1 | P19320 | CHEMBL3735 | Adhesion | 0.104671941 | 8 / 0Â Â Â Â Â |
| Selectin E | SELE | P16581 | CHEMBL3890 | Adhesion | 0.104671941 | 19 / 0Â Â Â Â Â |
| P2X purinoceptor 7 | P2RX7 | Q99572 | CHEMBL4805 | Ligand-gated ion channel | 0.104671941 | 362 / 0Â Â Â Â Â |
| Free fatty acid receptor 1 | FFAR1 | O14842 | CHEMBL4422 | Family A G protein-coupled receptor | 0.104671941 | 3 / 0Â Â Â Â Â |
| Activin receptor type-1B | ACVR1B | P36896 | CHEMBL5310 | Kinase | 0.104671941 | 2 / 0Â Â Â Â Â |
| Corticotropin releasing factor receptor 1 | CRHR1 | P34998 | CHEMBL1800 | Family B G protein-coupled receptor | 0.104671941 | 153 / 0Â Â Â Â Â |
| C-C chemokine receptor type 5 | CCR5 | P51681 | CHEMBL274 | Family A G protein-coupled receptor | 0.104671941 | 3 / 0Â Â Â Â Â |
| Calpain 1 | CAPN1 | P07384 | CHEMBL3891 | Protease | 0.104671941 | 77 / 0Â Â Â Â Â |
| NAD-dependent deacetylase sirtuin 2 | SIRT2 | Q8IXJ6 | CHEMBL4462 | Eraser | 0.104671941 | 51 / 0Â Â Â Â Â |
| Indoleamine 2,3-dioxygenase | IDO1 | P14902 | CHEMBL4685 | Enzyme | 0.104671941 | 37 / 0Â Â Â Â Â |
| Tyrosine-protein kinase JAK3 | JAK3 | P52333 | CHEMBL2148 | Kinase | 0.104671941 | 286 / 0Â Â Â Â Â |
| Tyrosine-protein kinase JAK1 | JAK1 | P23458 | CHEMBL2835 | Kinase | 0.104671941 | 186 / 0Â Â Â Â Â |
| Phosphodiesterase 4C | PDE4C | Q08493 | CHEMBL291 | Phosphodiesterase | 0.104671941 | 20 / 0Â Â Â Â Â |
| Tyrosine-protein kinase JAK2 | JAK2 | O60674 | CHEMBL2971 | Kinase | 0.104671941 | 346 / 0Â Â Â Â Â |
| Tyrosine-protein kinase TYK2 | TYK2 | P29597 | CHEMBL3553 | Kinase | 0.104671941 | 94 / 0Â Â Â Â Â |
| Chymase | CMA1 | P23946 | CHEMBL4068 | Protease | 0.104671941 | 54 / 0Â Â Â Â Â |
| ALK tyrosine kinase receptor | ALK | Q9UM73 | CHEMBL4247 | Kinase | 0.104671941 | 75 / 0Â Â Â Â Â |
| Stem cell growth factor receptor | KIT | P10721 | CHEMBL1936 | Kinase | 0.104671941 | 36 / 0Â Â Â Â Â |
| Tyrosine-protein kinase receptor FLT3 | FLT3 | P36888 | CHEMBL1974 | Kinase | 0.104671941 | 86 / 0Â Â Â Â Â |
| Kinesin-1 heavy chain/ Tyrosine-protein kinase receptor RET | RET | P07949 | CHEMBL2041 | Kinase | 0.104671941 | 42 / 0Â Â Â Â Â |
| Tyrosine-protein kinase YES | YES1 | P07947 | CHEMBL2073 | Kinase | 0.104671941 | 5 / 0Â Â Â Â Â |
| Serine/threonine-protein kinase PIM1 | PIM1 | P11309 | CHEMBL2147 | Kinase | 0.104671941 | 128 / 0Â Â Â Â Â |
| Tyrosine-protein kinase CSK | CSK | P41240 | CHEMBL2634 | Kinase | 0.104671941 | 3 / 0Â Â Â Â Â |
| Protein-glutamine gamma-glutamyltransferase | TGM2 | P21980 | CHEMBL2730 | Enzyme | 0.104671941 | 35 / 0Â Â Â Â Â |
| Casein kinase I delta | CSNK1D | P48730 | CHEMBL2828 | Kinase | 0.104671941 | 27 / 0Â Â Â Â Â |
| Serine/threonine-protein kinase mTOR | MTOR | P42345 | CHEMBL2842 | Kinase | 0.104671941 | 75 / 0Â Â Â Â Â |
| Cytochrome P450 17A1 | CYP17A1 | P05093 | CHEMBL3522 | Cytochrome P450 | 0.104671941 | 79 / 0Â Â Â Â Â |
| Serine/threonine-protein kinase PIM2 | PIM2 | Q9P1W9 | CHEMBL4523 | Kinase | 0.104671941 | 90 / 0Â Â Â Â Â |
| Serine/threonine-protein kinase RIPK2 | RIPK2 | O43353 | CHEMBL5014 | Kinase | 0.104671941 | 11 / 0Â Â Â Â Â |
| Insulin-like growth factor I receptor | IGF1R | P08069 | CHEMBL1957 | Kinase | 0.104671941 | 53 / 0Â Â Â Â Â |
| Cathepsin K | CTSK | P43235 | CHEMBL268 | Protease | 0.104671941 | 229 / 0Â Â Â Â Â |
| Sigma opioid receptor (by homology) | SIGMAR1 | Q99720 | CHEMBL287 | Membrane receptor | 0.697501031 | 314 / 418Â Â Â Â Â |
| Dopamine D2 receptor (by homology) | DRD2 | P14416 | CHEMBL217 | Family A G protein-coupled receptor | 0.688752414 | 276 / 655Â Â Â Â Â |
| Lysosomal Pro-X carboxypeptidase | PRCP | P42785 | CHEMBL2335 | Protease | 0.661620921 | 17 / 16Â Â Â Â Â |
| Dopamine D1 receptor | DRD1 | P21728 | CHEMBL2056 | Family A G protein-coupled receptor | 0.198808518 | 29 / 145Â Â Â Â Â |
| Mu opioid receptor | OPRM1 | P35372 | CHEMBL233 | Family A G protein-coupled receptor | 0.180616481 | 34 / 482Â Â Â Â Â |
| Dopamine D3 receptor | DRD3 | P35462 | CHEMBL234 | Family A G protein-coupled receptor | 0.135226129 | 129 / 217Â Â Â Â Â |
| Dopamine D5 receptor | DRD5 | P21918 | CHEMBL1850 | Family A G protein-coupled receptor | 0.135226129 | 17 / 23Â Â Â Â Â |
| Dopamine D4 receptor | DRD4 | P21917 | CHEMBL219 | Family A G protein-coupled receptor | 0.135226129 | 45 / 62Â Â Â Â Â |
| Norepinephrine transporter | SLC6A2 | P23975 | CHEMBL222 | Electrochemical transporter | 0.12615425 | 323 / 202Â Â Â Â Â |
| Serotonin transporter | SLC6A4 | P31645 | CHEMBL228 | Electrochemical transporter | 0.12615425 | 564 / 417Â Â Â Â Â |
| Kappa Opioid receptor | OPRK1 | P41145 | CHEMBL237 | Family A G protein-coupled receptor | 0.108018051 | 27 / 298Â Â Â Â Â |
| Protein-tyrosine phosphatase 1B | PTPN1 | P18031 | CHEMBL335 | Phosphatase | 0.1571192 | 12 / 30Â Â Â Â Â |
| Vitamin D receptor | VDR | P11473 | CHEMBL1977 | Nuclear receptor | 0.119061923 | 0 / 3Â Â Â Â Â |
| Dual specificity phosphatase Cdc25A | CDC25A | P30304 | CHEMBL3775 | Phosphatase | 0.119061923 | 4 / 13Â Â Â Â Â |
| Muscarinic acetylcholine receptor M4 | CHRM4 | P08173 | CHEMBL1821 | Family A G protein-coupled receptor | 0.996293668 | 53 / 6Â Â Â Â Â |
| Muscarinic acetylcholine receptor M5 | CHRM5 | P08912 | CHEMBL2035 | Family A G protein-coupled receptor | 0.996293668 | 72 / 10Â Â Â Â Â |
| P2X purinoceptor 4 | P2RX4 | Q99571 | CHEMBL2104 | Ligand-gated ion channel | 0.996293668 | 1 / 1Â Â Â Â Â |
| Muscarinic acetylcholine receptor M2 | CHRM2 | P08172 | CHEMBL211 | Family A G protein-coupled receptor | 0.996293668 | 178 / 24Â Â Â Â Â |
| Muscarinic acetylcholine receptor M1 | CHRM1 | P11229 | CHEMBL216 | Family A G protein-coupled receptor | 0.996293668 | 265 / 44Â Â Â Â Â |
| Norepinephrine transporter | SLC6A2 | P23975 | CHEMBL222 | Electrochemical transporter | 0.996293668 | 1055 / 285Â Â Â Â Â |
| Serotonin transporter | SLC6A4 | P31645 | CHEMBL228 | Electrochemical transporter | 0.996293668 | 1875 / 544Â Â Â Â Â |
| Dopamine transporter | SLC6A3 | Q01959 | CHEMBL238 | Electrochemical transporter | 0.996293668 | 1261 / 480Â Â Â Â Â |
| HERG | KCNH2 | Q12809 | CHEMBL240 | Voltage-gated ion channel | 0.996293668 | 509 / 67Â Â Â Â Â |
| Muscarinic acetylcholine receptor M3 | CHRM3 | P20309 | CHEMBL245 | Family A G protein-coupled receptor | 0.996293668 | 157 / 25Â Â Â Â Â |
| Neurokinin 1 receptor | TACR1 | P25103 | CHEMBL249 | Family A G protein-coupled receptor | 0.996293668 | 94 / 11Â Â Â Â Â |
| Sigma opioid receptor | SIGMAR1 | Q99720 | CHEMBL287 | Membrane receptor | 0.996293668 | 449 / 123Â Â Â Â Â |
| Cytochrome P450 2D6 | CYP2D6 | P10635 | CHEMBL289 | Cytochrome P450 | 0.996293668 | 8 / 2Â Â Â Â Â |
| Serotonin 1a (5-HT1a) receptor | HTR1A | P08908 | CHEMBL214 | Family A G protein-coupled receptor | 0.282326576 | 476 / 97Â Â Â Â Â |
| Inhibitor of nuclear factor kappa B kinase beta subunit | IKBKB | O14920 | CHEMBL1991 | Kinase | 0.104671941 | 89 / 0Â Â Â Â Â |
| Inhibitor of NF-kappa-B kinase (IKK) | CHUK | O15111 | CHEMBL3476 | Kinase | 0.104671941 | 47 / 0Â Â Â Â Â |
| Epidermal growth factor receptor erbB1 | EGFR | P00533 | CHEMBL203 | Kinase | 0.104671941 | 208 / 0Â Â Â Â Â |
| Cyclin-dependent kinase 2 | CDK2 | P24941 | CHEMBL301 | Kinase | 0.104671941 | 74 / 0Â Â Â Â Â |
| Cyclin-dependent kinase 1 | CDK1 | P06493 | CHEMBL308 | Kinase | 0.104671941 | 67 / 0Â Â Â Â Â |
| Protein kinase C theta | PRKCQ | Q04759 | CHEMBL3920 | Kinase | 0.104671941 | 225 / 0Â Â Â Â Â |
| Rho-associated protein kinase 1 | ROCK1 | Q13464 | CHEMBL3231 | Kinase | 0.104671941 | 130 / 0Â Â Â Â Â |
| Serine/threonine-protein kinase B-raf | BRAF | P15056 | CHEMBL5145 | Kinase | 0.104671941 | 18 / 0Â Â Â Â Â |
| Retinoid X receptor alpha | RXRA | P19793 | CHEMBL2061 | Nuclear receptor | 0.104671941 | 7 / 0Â Â Â Â Â |
| Cyclin-dependent kinase 9 | CDK9 | P50750 | CHEMBL3116 | Kinase | 0.104671941 | 135 / 0Â Â Â Â Â |
| Rho-associated protein kinase 2 | ROCK2 | O75116 | CHEMBL2973 | Kinase | 0.104671941 | 323 / 0Â Â Â Â Â |
| Serine/threonine-protein kinase Nek1 | NEK1 | Q96PY6 | CHEMBL5855 | Kinase | 0.104671941 | 180 / 0Â Â Â Â Â |
| Protein kinase C alpha | PRKCA | P17252 | CHEMBL299 | Kinase | 0.104671941 | 82 / 0Â Â Â Â Â |
| Protein kinase C beta | PRKCB | P05771 | CHEMBL3045 | Kinase | 0.104671941 | 109 / 0Â Â Â Â Â |
| Protein kinase C epsilon | PRKCE | Q02156 | CHEMBL3582 | Kinase | 0.104671941 | 70 / 0Â Â Â Â Â |
| Protein kinase C eta | PRKCH | P24723 | CHEMBL3616 | Kinase | 0.104671941 | 59 / 0Â Â Â Â Â |
| Maternal embryonic leucine zipper kinase | MELK | Q14680 | CHEMBL4578 | Kinase | 0.104671941 | 123 / 0Â Â Â Â Â |
| Dipeptidyl peptidase VIII | DPP8 | Q6V1X1 | CHEMBL4657 | Protease | 0.104671941 | 280 / 0Â Â Â Â Â |
| Serotonin 1f (5-HT1f) receptor | HTR1F | P30939 | CHEMBL1805 | Family A G protein-coupled receptor | 0.104671941 | 47 / 0Â Â Â Â Â |
| Dipeptidyl peptidase II | DPP7 | Q9UHL4 | CHEMBL3976 | Protease | 0.104671941 | 289 / 0Â Â Â Â Â |
| Dipeptidyl peptidase IX | DPP9 | Q86TI2 | CHEMBL4793 | Protease | 0.104671941 | 212 / 0Â Â Â Â Â |
| GABA-A receptor; alpha-1/beta-2/gamma-2 | GABRA1 GABRB2 GABRG2 | P14867 P47870 P18507 | CHEMBL2095172 | Ligand-gated ion channel | 0.104671941 | 5 / 0Â Â Â Â Â |
| Carbonic anhydrase II | CA2 | P00918 | CHEMBL205 | Lyase | 0.104671941 | 114 / 0Â Â Â Â Â |
| Carbonic anhydrase VII | CA7 | P43166 | CHEMBL2326 | Lyase | 0.104671941 | 11 / 0Â Â Â Â Â |
| Carbonic anhydrase I | CA1 | P00915 | CHEMBL261 | Lyase | 0.104671941 | 60 / 0Â Â Â Â Â |
| Carbonic anhydrase XIV | CA14 | Q9ULX7 | CHEMBL3510 | Lyase | 0.104671941 | 9 / 0Â Â Â Â Â |
| Carbonic anhydrase IX | CA9 | Q16790 | CHEMBL3594 | Lyase | 0.104671941 | 33 / 0Â Â Â Â Â |
| Serine/threonine-protein kinase Chk1 | CHEK1 | O14757 | CHEMBL4630 | Kinase | 0.104671941 | 348 / 0Â Â Â Â Â |
| Vascular endothelial growth factor receptor 2 | KDR | P35968 | CHEMBL279 | Kinase | 0.104671941 | 113 / 0Â Â Â Â Â |
| Dopamine D2 receptor | DRD2 | P14416 | CHEMBL217 | Family A G protein-coupled receptor | 0.104671941 | 1347 / 271Â Â Â Â Â |
| WD repeat-containing protein 5 | WDR5 | P61964 | CHEMBL1075317 | Unclassified protein | 0.104671941 | 22 / 0Â Â Â Â Â |
| Poly [ADP-ribose] polymerase-1 | PARP1 | P09874 | CHEMBL3105 | Enzyme | 0.104671941 | 385 / 0Â Â Â Â Â |
| Glycogen synthase kinase-3 beta | GSK3B | P49841 | CHEMBL262 | Kinase | 0.104671941 | 53 / 0Â Â Â Â Â |
| Carbonic anhydrase XII | CA12 | O43570 | CHEMBL3242 | Lyase | 0.104671941 | 21 / 0Â Â Â Â Â |
| Lymphocyte differentiation antigen CD38 (by homology) | CD38 | P28907 | CHEMBL4660 | Enzyme | 0.104671941 | 2 / 0Â Â Â Â Â |
| Tyrosine-protein kinase JAK1 | JAK1 | P23458 | CHEMBL2835 | Kinase | 0.104671941 | 132 / 0Â Â Â Â Â |
| Ribosomal protein S6 kinase 1 | RPS6KB1 | P23443 | CHEMBL4501 | Kinase | 0.104671941 | 97 / 0Â Â Â Â Â |
| Serine/threonine-protein kinase Aurora-A | AURKA | O14965 | CHEMBL4722 | Kinase | 0.104671941 | 93 / 0Â Â Â Â Â |
| Protein kinase N2 | PKN2 | Q16513 | CHEMBL3032 | Kinase | 0.104671941 | 22 / 0Â Â Â Â Â |
| Protein kinase N1 | PKN1 | Q16512 | CHEMBL3384 | Kinase | 0.104671941 | 12 / 0Â Â Â Â Â |
| Serine/threonine-protein kinase PIM1 | PIM1 | P11309 | CHEMBL2147 | Kinase | 0.104671941 | 394 / 0Â Â Â Â Â |
| Tyrosine-protein kinase SYK | SYK | P43405 | CHEMBL2599 | Kinase | 0.104671941 | 112 / 0Â Â Â Â Â |
| CaM kinase II | CAMK2D | Q13557 | CHEMBL2801 | Kinase | 0.104671941 | 49 / 0Â Â Â Â Â |
| Tyrosine-protein kinase JAK2 | JAK2 | O60674 | CHEMBL2971 | Kinase | 0.104671941 | 107 / 0Â Â Â Â Â |
| Protein kinase C (PKC) | PRKCZ | Q05513 | CHEMBL3438 | Kinase | 0.104671941 | 12 / 0Â Â Â Â Â |
| Dual specificity protein kinase TTK | TTK | P33981 | CHEMBL3983 | Kinase | 0.104671941 | 13 / 0Â Â Â Â Â |
| Serine/threonine-protein kinase PIM2 | PIM2 | Q9P1W9 | CHEMBL4523 | Kinase | 0.104671941 | 298 / 0Â Â Â Â Â |
| Kinesin-like protein 1 | KIF11 | P52732 | CHEMBL4581 | Other cytosolic protein | 0.104671941 | 158 / 0Â Â Â Â Â |
| Fibroblast activation protein alpha | FAP | Q12884 | CHEMBL4683 | Protease | 0.104671941 | 53 / 0Â Â Â Â Â |
| CDK2/Cyclin A | CCNA2 CDK2 | P20248 P24941 | CHEMBL3038469 | Kinase | 0.104671941 | 11 / 0Â Â Â Â Â |
| Protein kinase C mu | PRKD1 | Q15139 | CHEMBL3863 | Kinase | 0.104671941 | 19 / 0Â Â Â Â Â |
| Serine/threonine-protein kinase mTOR | MTOR | P42345 | CHEMBL2842 | Kinase | 0.104671941 | 53 / 0Â Â Â Â Â |
| PI3-kinase p110-alpha subunit | PIK3CA | P42336 | CHEMBL4005 | Enzyme | 0.104671941 | 53 / 0Â Â Â Â Â |
| CDC7/DBF4 (Cell division cycle 7-related protein kinase/Activator of S phase kinase) | CDC7 | O00311 | CHEMBL5443 | Kinase | 0.104671941 | 8 / 0Â Â Â Â Â |
| Tyrosine-protein kinase JAK3 | JAK3 | P52333 | CHEMBL2148 | Kinase | 0.104671941 | 71 / 0Â Â Â Â Â |
| Serine/threonine-protein kinase Aurora-B | AURKB | Q96GD4 | CHEMBL2185 | Kinase | 0.104671941 | 29 / 0Â Â Â Â Â |
| PDZ-binding kinase | PBK | Q96KB5 | CHEMBL4896 | Kinase | 0.104671941 | 54 / 0Â Â Â Â Â |
| Cyclin-dependent kinase 4 | CDK4 | P11802 | CHEMBL331 | Kinase | 0.104671941 | 17 / 0Â Â Â Â Â |
| Leucine-rich repeat serine/threonine-protein kinase 2 | LRRK2 | Q5S007 | CHEMBL1075104 | Kinase | 0.104671941 | 10 / 0Â Â Â Â Â |
| C-C chemokine receptor type 4 | CCR4 | P51679 | CHEMBL2414 | Family A G protein-coupled receptor | 0.104671941 | 12 / 0Â Â Â Â Â |
| Serine/threonine-protein kinase PRKX | PRKX | P51817 | CHEMBL5818 | Kinase | 0.104671941 | 3 / 0Â Â Â Â Â |
| Interleukin-1 receptor-associated kinase 4 | IRAK4 | Q9NWZ3 | CHEMBL3778 | Kinase | 0.104671941 | 74 / 0Â Â Â Â Â |
| Dopamine D5 receptor | DRD5 | P21918 | CHEMBL1850 | Family A G protein-coupled receptor | 0.104671941 | 74 / 9Â Â Â Â Â |
| Dopamine D1 receptor | DRD1 | P21728 | CHEMBL2056 | Family A G protein-coupled receptor | 0.104671941 | 231 / 15Â Â Â Â Â |
| Serine/threonine-protein kinase haspin | HASPIN | Q8TF76 | CHEMBL1075163 | Kinase | 0.104671941 | 16 / 0Â Â Â Â Â |
| Dipeptidyl peptidase I | CTSC | P53634 | CHEMBL2252 | Protease | 0.104671941 | 104 / 0Â Â Â Â Â |
| Tyrosine-protein kinase TYK2 | TYK2 | P29597 | CHEMBL3553 | Kinase | 0.104671941 | 38 / 0Â Â Â Â Â |
| Nitric-oxide synthase, brain | NOS1 | P29475 | CHEMBL3568 | Enzyme | 0.104671941 | 216 / 0Â Â Â Â Â |
| Nitric-oxide synthase, endothelial | NOS3 | P29474 | CHEMBL4803 | Enzyme | 0.104671941 | 57 / 0Â Â Â Â Â |
| Serotonin 2a (5-HT2a) receptor | HTR2A | P28223 | CHEMBL224 | Family A G protein-coupled receptor | 0.104671941 | 729 / 151Â Â Â Â Â |
| Ribosomal protein S6 kinase alpha 3 | RPS6KA3 | P51812 | CHEMBL2345 | Kinase | 0.104671941 | 8 / 0Â Â Â Â Â |
| Tyrosine-protein kinase ITK/TSK | ITK | Q08881 | CHEMBL2959 | Kinase | 0.104671941 | 15 / 0Â Â Â Â Â |
| LIM domain kinase 1 | LIMK1 | P53667 | CHEMBL3836 | Kinase | 0.104671941 | 31 / 0Â Â Â Â Â |
| C-C motif chemokine 2 | CCL2 | P13500 | CHEMBL1649052 | Family A G protein-coupled receptor | 0.104671941 | 3 / 0Â Â Â Â Â |
| 3-phosphoinositide dependent protein kinase-1 | PDPK1 | O15530 | CHEMBL2534 | Kinase | 0.104671941 | 39 / 0Â Â Â Â Â |
| Protein kinase C iota | PRKCI | P41743 | CHEMBL2598 | Kinase | 0.104671941 | 181 / 0Â Â Â Â Â |
| Ribosomal protein S6 kinase alpha 5 | RPS6KA5 | O75582 | CHEMBL4237 | Kinase | 0.104671941 | 14 / 0Â Â Â Â Â |
| Somatostatin receptor 4 | SSTR4 | P31391 | CHEMBL1853 | Family A G protein-coupled receptor | 0.104671941 | 8 / 0Â Â Â Â Â |
| Adenosine A2a receptor | ADORA2A | P29274 | CHEMBL251 | Family A G protein-coupled receptor | 0.104671941 | 12 / 0Â Â Â Â Â |
| Poly [ADP-ribose] polymerase 3 | PARP3 | Q9Y6F1 | CHEMBL5083 | Enzyme | 0.104671941 | 4 / 0Â Â Â Â Â |
| Poly [ADP-ribose] polymerase 2 | PARP2 | Q9UGN5 | CHEMBL5366 | Enzyme | 0.104671941 | 27 / 0Â Â Â Â Â |
| Serotonin 4 (5-HT4) receptor | HTR4 | Q13639 | CHEMBL1875 | Family A G protein-coupled receptor | 0.104671941 | 39 / 0Â Â Â Â Â |
| ATPase family AAA domain-containing protein 2 | ATAD2 | Q6PL18 | CHEMBL2150837 | Reader | 0.104671941 | 14 / 0Â Â Â Â Â |
| Inhibitor of apoptosis protein 3 | XIAP | P98170 | CHEMBL4198 | Other cytosolic protein | 0.104671941 | 187 / 0Â Â Â Â Â |
| Dual-specificity tyrosine-phosphorylation regulated kinase 2 | DYRK2 | Q92630 | CHEMBL4376 | Kinase | 0.104671941 | 9 / 0Â Â Â Â Â |
| Gamma-amino-N-butyrate transaminase (by homology) | ABAT | P80404 | CHEMBL2044 | Transferase | 0.104671941 | 10 / 0Â Â Â Â Â |
| Dihydroorotate dehydrogenase | DHODH | Q02127 | CHEMBL1966 | Oxidoreductase | 0.100578902 | 80 / 0Â Â Â Â Â |
| Aldo-keto-reductase family 1 member C3 | AKR1C3 | P42330 | CHEMBL4681 | Enzyme | 0.100578902 | 158 / 0Â Â Â Â Â |
| Aldo-keto reductase family 1 member C2 | AKR1C2 | P52895 | CHEMBL5847 | Enzyme | 0.100578902 | 61 / 0Â Â Â Â Â |
| Lysine-specific demethylase 6B | KDM6B | O15054 | CHEMBL1938211 | Eraser | 0.100578902 | 14 / 0Â Â Â Â Â |
| Peroxisome proliferator-activated receptor gamma | PPARG | P37231 | CHEMBL235 | Nuclear receptor | 0.100578902 | 280 / 0Â Â Â Â Â |
| Liver glycogen phosphorylase | PYGL | P06737 | CHEMBL2568 | Enzyme | 0.100578902 | 109 / 0Â Â Â Â Â |
| Muscle glycogen phosphorylase | PYGM | P11217 | CHEMBL3526 | Enzyme | 0.100578902 | 28 / 0Â Â Â Â Â |
| Lysine-specific demethylase 4C | KDM4C | Q9H3R0 | CHEMBL6175 | Eraser | 0.100578902 | 33 / 0Â Â Â Â Â |
| Thromboxane-A synthase | TBXAS1 | P24557 | CHEMBL1835 | Cytochrome P450 | 0.100578902 | 132 / 0Â Â Â Â Â |
| ADAMTS4 | ADAMTS4 | O75173 | CHEMBL2318 | Protease | 0.100578902 | 6 / 0Â Â Â Â Â |
| Apoptosis regulator Bcl-X | BCL2L1 | Q07817 | CHEMBL4625 | Other ion channel | 0.100578902 | 24 / 0Â Â Â Â Â |
| Glutamate [NMDA] receptor PROTEIN | GRIN1 | Q05586 | CHEMBL2015 | Ligand-gated ion channel | 0.100578902 | 19 / 0Â Â Â Â Â |
| Peroxisome proliferator-activated receptor alpha | PPARA | Q07869 | CHEMBL239 | Nuclear receptor | 0.100578902 | 208 / 0Â Â Â Â Â |
| Prostanoid EP1 receptor | PTGER1 | P34995 | CHEMBL1811 | Family A G protein-coupled receptor | 0.100578902 | 225 / 0Â Â Â Â Â |
| Prostanoid EP4 receptor | PTGER4 | P35408 | CHEMBL1836 | Family A G protein-coupled receptor | 0.100578902 | 40 / 0Â Â Â Â Â |
| Dual-specificity tyrosine-phosphorylation regulated kinase 1A | DYRK1A | Q13627 | CHEMBL2292 | Kinase | 0.100578902 | 19 / 0Â Â Â Â Â |
| Matrix metalloproteinase 13 | MMP13 | P45452 | CHEMBL280 | Protease | 0.100578902 | 44 / 0Â Â Â Â Â |
| Matrix metalloproteinase 3 | MMP3 | P08254 | CHEMBL283 | Protease | 0.100578902 | 52 / 0Â Â Â Â Â |
| Matrix metalloproteinase 9 | MMP9 | P14780 | CHEMBL321 | Protease | 0.100578902 | 60 / 0Â Â Â Â Â |
| Matrix metalloproteinase 2 | MMP2 | P08253 | CHEMBL333 | Protease | 0.100578902 | 105 / 0Â Â Â Â Â |
| Dual specificity protein kinase CLK4 (by homology) | CLK4 | Q9HAZ1 | CHEMBL4203 | Kinase | 0.100578902 | 13 / 0Â Â Â Â Â |
| Dual specificty protein kinase CLK1 (by homology) | CLK1 | P49759 | CHEMBL4224 | Kinase | 0.100578902 | 17 / 0Â Â Â Â Â |
| Phospholipase A2 group IIA | PLA2G2A | P14555 | CHEMBL3474 | Enzyme | 0.100578902 | 43 / 0Â Â Â Â Â |
| Lysosomal protective protein | CTSA | P10619 | CHEMBL6115 | Protease | 0.100578902 | 280 / 0Â Â Â Â Â |
| Dual specificity phosphatase Cdc25A | CDC25A | P30304 | CHEMBL3775 | Phosphatase | 0.100578902 | 6 / 0Â Â Â Â Â |
| Dual specificity phosphatase Cdc25B | CDC25B | P30305 | CHEMBL4804 | Phosphatase | 0.100578902 | 7 / 0Â Â Â Â Â |
| Lysine-specific demethylase 4D | KDM4D | Q6B0I6 | CHEMBL6138 | Eraser | 0.100578902 | 7 / 0Â Â Â Â Â |
| Aldose reductase (by homology) | AKR1B1 | P15121 | CHEMBL1900 | Enzyme | 0.100578902 | 331 / 0Â Â Â Â Â |
| Carbonic anhydrase VII | CA7 | P43166 | CHEMBL2326 | Lyase | 0.100578902 | 11 / 0Â Â Â Â Â |
| Estrogen receptor beta | ESR2 | Q92731 | CHEMBL242 | Nuclear receptor | 0.100578902 | 12 / 0Â Â Â Â Â |
| Carbonic anhydrase I | CA1 | P00915 | CHEMBL261 | Lyase | 0.100578902 | 98 / 0Â Â Â Â Â |
| Carbonic anhydrase XII | CA12 | O43570 | CHEMBL3242 | Lyase | 0.100578902 | 41 / 0Â Â Â Â Â |
| Carbonic anhydrase IV | CA4 | P22748 | CHEMBL3729 | Lyase | 0.100578902 | 7 / 0Â Â Â Â Â |
| Tyrosine-protein kinase ABL | ABL1 | P00519 | CHEMBL1862 | Kinase | 0.100578902 | 6 / 0Â Â Â Â Â |
| Hydroxyacid oxidase 2 (by homology) | HAO2 | Q9NYQ3 | CHEMBL2169732 | Enzyme | 0.100578902 | 28 / 0Â Â Â Â Â |
| Serine/threonine-protein kinase PIM1 | PIM1 | P11309 | CHEMBL2147 | Kinase | 0.100578902 | 15 / 0Â Â Â Â Â |
| Neurotensin receptor 3 | SORT1 | Q99523 | CHEMBL3091 | Membrane receptor | 0.100578902 | 13 / 0Â Â Â Â Â |
| Methionine aminopeptidase 2 | METAP2 | P50579 | CHEMBL3922 | Protease | 0.100578902 | 39 / 0Â Â Â Â Â |
| Serine/threonine-protein kinase PIM2 | PIM2 | Q9P1W9 | CHEMBL4523 | Kinase | 0.100578902 | 6 / 0Â Â Â Â Â |
| Intercellular adhesion molecule (ICAM-1), Integrin alpha-L/beta-2 | ITGAL ICAM1 ITGB2 | P20701 P05362 P05107 | CHEMBL2096661 | Membrane receptor | 0.100578902 | 38 / 0Â Â Â Â Â |
| G protein-coupled receptor 44 | PTGDR2 | Q9Y5Y4 | CHEMBL5071 | Family A G protein-coupled receptor | 0.100578902 | 742 / 0Â Â Â Â Â |
| Glutamate carboxypeptidase II | FOLH1 | Q04609 | CHEMBL1892 | Protease | 0.100578902 | 36 / 0Â Â Â Â Â |
| CDK8/Cyclin C | CCNC CDK8 | P24863 P49336 | CHEMBL3038474 | Kinase | 0.100578902 | 2 / 0Â Â Â Â Â |
| Cell division protein kinase 8 | CDK8 | P49336 | CHEMBL5719 | Kinase | 0.100578902 | 1 / 0Â Â Â Â Â |
| Uracil nucleotide/cysteinyl leukotriene receptor | GPR17 | Q13304 | CHEMBL1075162 | Family A G protein-coupled receptor | 0.100578902 | 1 / 0Â Â Â Â Â |
| G-protein coupled receptor 35 | GPR35 | Q9HC97 | CHEMBL1293267 | Family A G protein-coupled receptor | 0.100578902 | 44 / 0Â Â Â Â Â |
| Glutamate receptor ionotropic kainate 1 | GRIK1 | P39086 | CHEMBL1918 | Ligand-gated ion channel | 0.100578902 | 18 / 0Â Â Â Â Â |
| Protein-tyrosine phosphatase 1B | PTPN1 | P18031 | CHEMBL335 | Phosphatase | 0.100578902 | 31 / 0Â Â Â Â Â |
| Dual specificity mitogen-activated protein kinase kinase 1 | MAP2K1 | Q02750 | CHEMBL3587 | Kinase | 0.100578902 | 78 / 0Â Â Â Â Â |
| Membrane metallo-endopeptidase-like 1 | MMEL1 | Q495T6 | CHEMBL3638356 | Hydrolase | 0.100578902 | 4 / 0Â Â Â Â Â |
| Integrin alpha-V/beta-3 | ITGAV ITGB3 | P06756 P05106 | CHEMBL1907598 | Membrane receptor | 0.100578902 | 60 / 0Â Â Â Â Â |
| Endothelin receptor ET-A (by homology) | EDNRA | P25101 | CHEMBL252 | Family A G protein-coupled receptor | 0.100578902 | 246 / 0Â Â Â Â Â |
| Matrix metalloproteinase 8 | MMP8 | P22894 | CHEMBL4588 | Protease | 0.100578902 | 75 / 0Â Â Â Â Â |
| Platelet-derived growth factor receptor beta | PDGFRB | P09619 | CHEMBL1913 | Kinase | 0.100578902 | 9 / 0Â Â Â Â Â |
| Fatty acid binding protein adipocyte | FABP4 | P15090 | CHEMBL2083 | Fatty acid binding protein family | 0.100578902 | 39 / 0Â Â Â Â Â |
| Vascular endothelial growth factor receptor 2 | KDR | P35968 | CHEMBL279 | Kinase | 0.100578902 | 25 / 0Â Â Â Â Â |
| Fibroblast growth factor receptor 1 | FGFR1 | P11362 | CHEMBL3650 | Kinase | 0.100578902 | 12 / 0Â Â Â Â Â |
| MAP kinase signal-integrating kinase 2 | MKNK2 | Q9HBH9 | CHEMBL4204 | Kinase | 0.100578902 | 16 / 0Â Â Â Â Â |
| Solute carrier family 22 member 12 | SLC22A12 | Q96S37 | CHEMBL6120 | Electrochemical transporter | 0.100578902 | 57 / 0Â Â Â Â Â |
| Angiotensin-converting enzyme (by homology) | ACE | P12821 | CHEMBL1808 | Protease | 0.100578902 | 350 / 0Â Â Â Â Â |
| Phosphodiesterase 5A | PDE5A | O76074 | CHEMBL1827 | Phosphodiesterase | 0.100578902 | 8 / 0Â Â Â Â Â |
| Matrix metalloproteinase 12 | MMP12 | P39900 | CHEMBL4393 | Protease | 0.100578902 | 30 / 0Â Â Â Â Â |
| Neprilysin | MME | P08473 | CHEMBL1944 | Protease | 0.100578902 | 243 / 0Â Â Â Â Â |
| Carbonic anhydrase II | CA2 | P00918 | CHEMBL205 | Lyase | 0.100578902 | 119 / 0Â Â Â Â Â |
| Lysine-specific demethylase 5A | KDM5A | P29375 | CHEMBL2424504 | Eraser | 0.100578902 | 7 / 0Â Â Â Â Â |
| Metabotropic glutamate receptor 1 | GRM1 | Q13255 | CHEMBL3772 | Family C G protein-coupled receptor | 0.100578902 | 2 / 0Â Â Â Â Â |
| Bone morphogenetic protein 1 | BMP1 | P13497 | CHEMBL3898 | Protease | 0.100578902 | 12 / 0Â Â Â Â Â |
| Lysine-specific demethylase 4A | KDM4A | O75164 | CHEMBL5896 | Eraser | 0.100578902 | 6 / 0Â Â Â Â Â |
| Peptidyl-prolyl cis-trans isomerase NIMA-interacting 1 | PIN1 | Q13526 | CHEMBL2288 | Enzyme | 0.100578902 | 45 / 0Â Â Â Â Â |
| Cathepsin (V and K) | CTSV | O60911 | CHEMBL3272 | Protease | 0.100578902 | 8 / 0Â Â Â Â Â |
| Cathepsin L | CTSL | P07711 | CHEMBL3837 | Protease | 0.100578902 | 16 / 0Â Â Â Â Â |
| Phosphodiesterase 10A | PDE10A | Q9Y233 | CHEMBL4409 | Phosphodiesterase | 0.100578902 | 12 / 0Â Â Â Â Â |
| Free fatty acid receptor 1 | FFAR1 | O14842 | CHEMBL4422 | Family A G protein-coupled receptor | 0.100578902 | 76 / 0Â Â Â Â Â |
| Epidermal growth factor receptor erbB1 | EGFR | P00533 | CHEMBL203 | Kinase | 0.100578902 | 36 / 0Â Â Â Â Â |
| c-Jun N-terminal kinase 1 | MAPK8 | P45983 | CHEMBL2276 | Kinase | 0.100578902 | 27 / 0Â Â Â Â Â |
| Matrix metalloproteinase 1 | MMP1 | P03956 | CHEMBL332 | Protease | 0.100578902 | 35 / 0Â Â Â Â Â |
| Muscle glycogen synthase | GYS1 | P13807 | CHEMBL4000 | Enzyme | 0.100578902 | 3 / 0Â Â Â Â Â |
| Serine/threonine-protein kinase Aurora-A | AURKA | O14965 | CHEMBL4722 | Kinase | 0.100578902 | 45 / 0Â Â Â Â Â |
| Vascular endothelial growth factor receptor 1 (by homology) | FLT1 | P17948 | CHEMBL1868 | Kinase | 0.100578902 | 7 / 0Â Â Â Â Â |
| ADAMTS5 | ADAMTS5 | Q9UNA0 | CHEMBL2285 | Protease | 0.100578902 | 65 / 0Â Â Â Â Â |
| DNA excision repair protein ERCC-5 | ERCC5 | P28715 | CHEMBL4736 | Other nuclear protein | 0.100578902 | 15 / 0Â Â Â Â Â |
| Carboxypeptidase A1 | CPA1 | P15085 | CHEMBL2088 | Protease | 0.100578902 | 12 / 0Â Â Â Â Â |
| Cathepsin S | CTSS | P25774 | CHEMBL2954 | Protease | 0.100578902 | 10 / 0Â Â Â Â Â |
| Angiotensin-converting enzyme 2 | ACE2 | Q9BYF1 | CHEMBL3736 | Protease | 0.100578902 | 24 / 0Â Â Â Â Â |
| PI3-kinase p110-alpha subunit | PIK3CA | P42336 | CHEMBL4005 | Enzyme | 0.100578902 | 25 / 0Â Â Â Â Â |
| Protein farnesyltransferase | FNTA FNTB | P49354 P49356 | CHEMBL2094108 | Enzyme | 0.100578902 | 35 / 0Â Â Â Â Â |
| CREB-binding protein/p53 | CREBBP | Q92793 | CHEMBL5747 | Writer | 0.100578902 | 10 / 0Â Â Â Â Â |
| Integrin alpha-4/beta-1 | ITGB1 ITGA4 | P05556 P13612 | CHEMBL1907599 | Membrane receptor | 0.100578902 | 220 / 0Â Â Â Â Â |
| Lysine-specific demethylase 5B | KDM5B | Q9UGL1 | CHEMBL3774295 | Eraser | 0.100578902 | 10 / 0Â Â Â Â Â |
| Lysine-specific demethylase 2B | KDM2B | Q8NHM5 | CHEMBL3779760 | Eraser | 0.100578902 | 3 / 0Â Â Â Â Â |
| Plectin | PLEC | Q15149 | CHEMBL1293240 | Unclassified protein | 0.100578902 | 3 / 0Â Â Â Â Â |
| Receptor-type tyrosine-protein phosphatase F (LAR) | PTPRF | P10586 | CHEMBL3521 | Membrane receptor | 0.100578902 | 11 / 0Â Â Â Â Â |
| T-cell protein-tyrosine phosphatase | PTPN2 | P17706 | CHEMBL3807 | Phosphatase | 0.100578902 | 14 / 0Â Â Â Â Â |
| Aldo-keto reductase family 1 member C1 | AKR1C1 | Q04828 | CHEMBL5905 | Enzyme | 0.100578902 | 14 / 0Â Â Â Â Â |
| 6-phosphofructo-2-kinase/fructose-2,6-bisphosphatase 3 | PFKFB3 | Q16875 | CHEMBL2331053 | Enzyme | 0.100578902 | 16 / 0Â Â Â Â Â |
| PI3-kinase p110-delta subunit | PIK3CD | O00329 | CHEMBL3130 | Enzyme | 0.100578902 | 10 / 0Â Â Â Â Â |
| PI3-kinase p110-beta subunit | PIK3CB | P42338 | CHEMBL3145 | Enzyme | 0.100578902 | 17 / 0Â Â Â Â Â |
| Hydroxycarboxylic acid receptor 2 | HCAR2 | Q8TDS4 | CHEMBL3785 | Family A G protein-coupled receptor | 0.100578902 | 60 / 0Â Â Â Â Â |
| Angiotensin II receptor | AGTR2 | P50052 | CHEMBL4607 | Family A G protein-coupled receptor | 0.100578902 | 7 / 0Â Â Â Â Â |
| Bromodomain-containing protein 4 | BRD4 | O60885 | CHEMBL1163125 | Reader | 0.100578902 | 10 / 0Â Â Â Â Â |
| Fatty acid binding protein adipocyte | FABP4 | P15090 | CHEMBL2083 | Fatty acid binding protein family | 0.308524211 | 0 / 3Â Â Â Â Â |
| Fatty acid binding protein muscle | FABP3 | P05413 | CHEMBL3344 | Fatty acid binding protein family | 0.308524211 | 0 / 5Â Â Â Â Â |
| Fatty acid binding protein epidermal | FABP5 | Q01469 | CHEMBL3674 | Fatty acid binding protein family | 0.308524211 | 0 / 2Â Â Â Â Â |
| Peroxisome proliferator-activated receptor delta | PPARD | Q03181 | CHEMBL3979 | Nuclear receptor | 0.308524211 | 0 / 7Â Â Â Â Â |
| Free fatty acid receptor 1 | FFAR1 | O14842 | CHEMBL4422 | Family A G protein-coupled receptor | 0.308524211 | 0 / 3Â Â Â Â Â |
| Fatty acid binding protein intestinal | FABP2 | P12104 | CHEMBL4879 | Fatty acid binding protein family | 0.308524211 | 0 / 1Â Â Â Â Â |
| 11-beta-hydroxysteroid dehydrogenase 1 | HSD11B1 | P28845 | CHEMBL4235 | Enzyme | 0.241739167 | 0 / 22Â Â Â Â Â |
| Peroxisome proliferator-activated receptor alpha | PPARA | Q07869 | CHEMBL239 | Nuclear receptor | 0.208479015 | 1 / 9Â Â Â Â Â |
| Androgen Receptor | AR | P10275 | CHEMBL1871 | Nuclear receptor | 0.200134622 | 0 / 33Â Â Â Â Â |
| Vitamin D receptor | VDR | P11473 | CHEMBL1977 | Nuclear receptor | 0.200134622 | 0 / 2Â Â Â Â Â |
| Bile acid receptor FXR | NR1H4 | Q96RI1 | CHEMBL2047 | Nuclear receptor | 0.200134622 | 0 / 11Â Â Â Â Â |
| DNA polymerase beta (by homology) | POLB | P06746 | CHEMBL2392 | Enzyme | 0.200134622 | 0 / 5Â Â Â Â Â |
| Dual specificity phosphatase Cdc25A | CDC25A | P30304 | CHEMBL3775 | Phosphatase | 0.200134622 | 0 / 14Â Â Â Â Â |
| G-protein coupled bile acid receptor 1 | GPBAR1 | Q8TDU6 | CHEMBL5409 | Family A G protein-coupled receptor | 0.200134622 | 0 / 15Â Â Â Â Â |
| Aldo-keto reductase family 1 member B10 | AKR1B10 | O60218 | CHEMBL5983 | Enzyme | 0.200134622 | 0 / 7Â Â Â Â Â |
| UDP-glucuronosyltransferase 2B7 | UGT2B7 | P16662 | CHEMBL4370 | Enzyme | 0.16664584 | 0 / 20Â Â Â Â Â |
| Cytochrome P450 19A1 | CYP19A1 | P11511 | CHEMBL1978 | Cytochrome P450 | 0.16664584 | 0 / 22Â Â Â Â Â |
| Corticosteroid binding globulin | SERPINA6 | P08185 | CHEMBL2421 | Secreted protein | 0.16664584 | 0 / 6Â Â Â Â Â |
| Testis-specific androgen-binding protein | SHBG | P04278 | CHEMBL3305 | Secreted protein | 0.16664584 | 0 / 26Â Â Â Â Â |
| Estradiol 17-beta-dehydrogenase 3 | HSD17B3 | P37058 | CHEMBL4234 | Enzyme | 0.16664584 | 0 / 11Â Â Â Â Â |
| Glucose-6-phosphate 1-dehydrogenase | G6PD | P11413 | CHEMBL5347 | Enzyme | 0.16664584 | 0 / 9Â Â Â Â Â |
| GABA-B receptor (by homology) | GABBR1 | Q9UBS5 | CHEMBL2064 | Family C G protein-coupled receptor | 0.16664584 | 0 / 1Â Â Â Â Â |
| Solute carrier family 22 member 6 | SLC22A6 | Q4U2R8 | CHEMBL1641347 | Electrochemical transporter | 0.158397607 | 2 / 2Â Â Â Â Â |
| Prostanoid EP2 receptor | PTGER2 | P43116 | CHEMBL1881 | Family A G protein-coupled receptor | 0.150097811 | 0 / 5Â Â Â Â Â |
| Prostanoid FP receptor | PTGFR | P43088 | CHEMBL1987 | Family A G protein-coupled receptor | 0.150097811 | 0 / 1Â Â Â Â Â |
| Protein farnesyltransferase | FNTA FNTB | P49354 P49356 | CHEMBL2094108 | Enzyme | 0.150097811 | 0 / 8Â Â Â Â Â |
| Niemann-Pick C1-like protein 1 | NPC1L1 | Q9UHC9 | CHEMBL2027 | Other membrane protein | 0.150097811 | 0 / 6Â Â Â Â Â |
| GABA A receptor alpha-2/beta-2/gamma-2 | GABRA2 GABRB2 GABRG2 | P47869 P47870 P18507 | CHEMBL2111413 | Ligand-gated ion channel | 0.150097811 | 0 / 2Â Â Â Â Â |
| 11-beta-hydroxysteroid dehydrogenase 2 | HSD11B2 | P80365 | CHEMBL3746 | Enzyme | 0.141787381 | 0 / 3Â Â Â Â Â |
| Hydroxyacid oxidase 1 | HAO1 | Q9UJM8 | CHEMBL4229 | Enzyme | 0.141787381 | 0 / 1Â Â Â Â Â |
| Lysine-specific demethylase 5C | KDM5C | P41229 | CHEMBL2163176 | Eraser | 0.133391038 | 5 / 1Â Â Â Â Â |
| Lysine-specific demethylase 2A | KDM2A | Q9Y2K7 | CHEMBL1938210 | Eraser | 0.133391038 | 4 / 1Â Â Â Â Â |
| Histone lysine demethylase PHF8 | PHF8 | Q9UPP1 | CHEMBL1938212 | Eraser | 0.133391038 | 3 / 1Â Â Â Â Â |
| Glutamate carboxypeptidase II | FOLH1 | Q04609 | CHEMBL1892 | Protease | 0.133391038 | 15 / 10Â Â Â Â Â |
| Mast cell carboxypeptidase A | CPA3 | P15088 | CHEMBL2645 | Protease | 0.133391038 | 3 / 0Â Â Â Â Â |
| Carbonic anhydrase II | CA2 | P00918 | CHEMBL205 | Lyase | 0.12507596 | 24 / 5Â Â Â Â Â |
| Carbonic anhydrase I | CA1 | P00915 | CHEMBL261 | Lyase | 0.12507596 | 27 / 7Â Â Â Â Â |
| Plasminogen | PLG | P00747 | CHEMBL1801 | Protease | 0.12507596 | 0 / 1Â Â Â Â Â |
| Glutathione S-transferase kappa 1 | GSTK1 | Q9Y2Q3 | CHEMBL4491 | Enzyme | 0.12507596 | 0 / 1Â Â Â Â Â |
| CDC45-related protein | CDC45 | O75419 | CHEMBL3040 | Other nuclear protein | 0.12507596 | 0 / 1Â Â Â Â Â |
| Renin | REN | P00797 | CHEMBL286 | Protease | 0.12507596 | 2 / 0Â Â Â Â Â |
| Kynurenine 3-monooxygenase (by homology) | KMO | O15229 | CHEMBL2145 | Oxidoreductase | 0.116739032 | 39 / 0Â Â Â Â Â |
| Voltage-gated calcium channel alpha2/delta subunit 1 | CACNA2D1 | P54289 | CHEMBL1919 | Calcium channel auxiliary subunit alpha2delta family | 0.116739032 | 0 / 4Â Â Â Â Â |
| Carboxypeptidase A1 | CPA1 | P15085 | CHEMBL2088 | Protease | 0.116739032 | 2 / 0Â Â Â Â Â |
| Farnesyl diphosphate synthase | FDPS | P14324 | CHEMBL1782 | Transferase | 0.116739032 | 2 / 0Â Â Â Â Â |
| Leukotriene A4 hydrolase | LTA4H | P09960 | CHEMBL4618 | Protease | 0.116739032 | 2 / 1Â Â Â Â Â |
| Metabotropic glutamate receptor 5 | GRM5 | P41594 | CHEMBL3227 | Family C G protein-coupled receptor | 0.116739032 | 0 / 4Â Â Â Â Â |
| Prostaglandin E synthase | PTGES | O14684 | CHEMBL5658 | Enzyme | 0.116739032 | 0 / 8Â Â Â Â Â |
| Squalene synthetase (by homology) | FDFT1 | P37268 | CHEMBL3338 | Enzyme | 0.116739032 | 0 / 1Â Â Â Â Â |
| Histone acetyltransferase PCAF | KAT2B | Q92831 | CHEMBL5500 | Writer | 0.101613855 | 0 / 6Â Â Â Â Â |
| Cytochrome P450 17A1 | CYP17A1 | P05093 | CHEMBL3522 | Cytochrome P450 | 0.101613855 | 15 / 0Â Â Â Â Â |
| Isocitrate dehydrogenase [NADP] cytoplasmic | IDH1 | O75874 | CHEMBL2007625 | Enzyme | 0.101613855 | 17 / 0Â Â Â Â Â |
| Tyrosine-protein kinase JAK3 | JAK3 | P52333 | CHEMBL2148 | Kinase | 0.101613855 | 9 / 0Â Â Â Â Â |
| Tyrosine-protein kinase JAK2 | JAK2 | O60674 | CHEMBL2971 | Kinase | 0.101613855 | 8 / 0Â Â Â Â Â |
| Intermediate conductance calcium-activated potassium channel protein 4 | KCNN4 | O15554 | CHEMBL4305 | Voltage-gated ion channel | 0.101613855 | 1 / 0Â Â Â Â Â |
| Muscarinic acetylcholine receptor M5 | CHRM5 | P08912 | CHEMBL2035 | Family A G protein-coupled receptor | 0.101613855 | 5 / 0Â Â Â Â Â |
| Lymphocyte differentiation antigen CD38 | CD38 | P28907 | CHEMBL4660 | Enzyme | 0.101613855 | 2 / 0Â Â Â Â Â |
| Vascular endothelial growth factor receptor 1 | FLT1 | P17948 | CHEMBL1868 | Kinase | 0.101613855 | 32 / 0Â Â Â Â Â |
| Vascular endothelial growth factor receptor 2 | KDR | P35968 | CHEMBL279 | Kinase | 0.101613855 | 81 / 0Â Â Â Â Â |
| Histamine H3 receptor | HRH3 | Q9Y5N1 | CHEMBL264 | Family A G protein-coupled receptor | 0.101613855 | 6 / 0Â Â Â Â Â |
| 11-beta-hydroxysteroid dehydrogenase 1 | HSD11B1 | P28845 | CHEMBL4235 | Enzyme | 0.101613855 | 49 / 0Â Â Â Â Â |
| Androgen Receptor | AR | P10275 | CHEMBL1871 | Nuclear receptor | 0.101613855 | 165 / 47Â Â Â Â Â |
| Cannabinoid receptor 2 | CNR2 | P34972 | CHEMBL253 | Family A G protein-coupled receptor | 0.101613855 | 29 / 0Â Â Â Â Â |
| Progesterone receptor | PGR | P06401 | CHEMBL208 | Nuclear receptor | 0.101613855 | 26 / 0Â Â Â Â Â |
| c-Jun N-terminal kinase 1 | MAPK8 | P45983 | CHEMBL2276 | Kinase | 0.101613855 | 7 / 0Â Â Â Â Â |
| c-Jun N-terminal kinase 3 | MAPK10 | P53779 | CHEMBL2637 | Kinase | 0.101613855 | 6 / 0Â Â Â Â Â |
| Histamine H4 receptor | HRH4 | Q9H3N8 | CHEMBL3759 | Family A G protein-coupled receptor | 0.101613855 | 3 / 0Â Â Â Â Â |
| Endothelial PAS domain-containing protein 1 | EPAS1 | Q99814 | CHEMBL1744522 | Unclassified protein | 0.101613855 | 4 / 0Â Â Â Â Â |
| Metabotropic glutamate receptor 5 | GRM5 | P41594 | CHEMBL3227 | Family C G protein-coupled receptor | 0.101613855 | 22 / 0Â Â Â Â Â |
| Elongation of very long chain fatty acids protein 6 | ELOVL6 | Q9H5J4 | CHEMBL5704 | Enzyme | 0.101613855 | 26 / 0Â Â Â Â Â |
| Protein kinase C epsilon | PRKCE | Q02156 | CHEMBL3582 | Kinase | 0.101613855 | 5 / 0Â Â Â Â Â |
| Sphingosine 1-phosphate receptor Edg-1 | S1PR1 | P21453 | CHEMBL4333 | Family A G protein-coupled receptor | 0.101613855 | 21 / 0Â Â Â Â Â |
| Acyl-CoA desaturase | SCD | O00767 | CHEMBL5555 | Enzyme | 0.101613855 | 10 / 0Â Â Â Â Â |
| Leucine-rich repeat serine/threonine-protein kinase 2 | LRRK2 | Q5S007 | CHEMBL1075104 | Kinase | 0.101613855 | 29 / 0Â Â Â Â Â |
| GABA-A receptor; alpha-5/beta-3/gamma-2 | GABRB3 GABRG2 GABRA5 | P28472 P18507 P31644 | CHEMBL2094122 | Ligand-gated ion channel | 0.101613855 | 10 / 0Â Â Â Â Â |
| Beta secretase 2 | BACE2 | Q9Y5Z0 | CHEMBL2525 | Protease | 0.101613855 | 12 / 0Â Â Â Â Â |
| P2X purinoceptor 7 | P2RX7 | Q99572 | CHEMBL4805 | Ligand-gated ion channel | 0.101613855 | 211 / 0Â Â Â Â Â |
| Beta-secretase 1 | BACE1 | P56817 | CHEMBL4822 | Protease | 0.101613855 | 37 / 0Â Â Â Â Â |
| Glucocorticoid receptor | NR3C1 | P04150 | CHEMBL2034 | Nuclear receptor | 0.101613855 | 13 / 0Â Â Â Â Â |
| Muscarinic acetylcholine receptor M3 | CHRM3 | P20309 | CHEMBL245 | Family A G protein-coupled receptor | 0.101613855 | 3 / 0Â Â Â Â Â |
| Muscarinic acetylcholine receptor M2 (by homology) | CHRM2 | P08172 | CHEMBL211 | Family A G protein-coupled receptor | 0.101613855 | 2 / 0Â Â Â Â Â |
| Cytochrome P450 19A1 | CYP19A1 | P11511 | CHEMBL1978 | Cytochrome P450 | 0.101613855 | 6 / 0Â Â Â Â Â |
| Signal transducer and activator of transcription 3 | STAT3 | P40763 | CHEMBL4026 | Transcription factor | 0.101613855 | 1 / 0Â Â Â Â Â |
| Monoamine oxidase B | MAOB | P27338 | CHEMBL2039 | Oxidoreductase | 0.101613855 | 29 / 0Â Â Â Â Â |
| Indoleamine 2,3-dioxygenase | IDO1 | P14902 | CHEMBL4685 | Enzyme | 0.101613855 | 1 / 0Â Â Â Â Â |
| Dihydrofolate reductase | DHFR | P00374 | CHEMBL202 | Oxidoreductase | 0.101613855 | 13 / 0Â Â Â Â Â |
| Bcl-2-related protein A1 (by homology) | BCL2A1 | Q16548 | CHEMBL6044 | Unclassified protein | 0.101613855 | 4 / 0Â Â Â Â Â |
| Carbonic anhydrase I | CA1 | P00915 | CHEMBL261 | Lyase | 0.101613855 | 7 / 0Â Â Â Â Â |
| Galanin receptor 3 | GALR3 | O60755 | CHEMBL2731 | Family A G protein-coupled receptor | 0.101613855 | 3 / 0Â Â Â Â Â |
| Carbonic anhydrase XII | CA12 | O43570 | CHEMBL3242 | Lyase | 0.101613855 | 10 / 0Â Â Â Â Â |
| Carbonic anhydrase IX | CA9 | Q16790 | CHEMBL3594 | Lyase | 0.101613855 | 10 / 0Â Â Â Â Â |
| Metabotropic glutamate receptor 2 | GRM2 | Q14416 | CHEMBL5137 | Family C G protein-coupled receptor | 0.101613855 | 17 / 0Â Â Â Â Â |
